# Supplementary material for: Transmol: repurposing a language model for molecular generation
Source: Royal Society of Chemistry journal article supplement (doi:10.1039/d1ra03086h), 2021-01-01
Supplement: d1ra03086h1.pdf [file d1ra03086h1.pdf]

## Supplementary Information

*Transmol: Repurposing a language model for molecular generation*

R. Zhumagambetov, F. Molnár, V. A. Peshkov and S. Fazli

### S1 Filters

In this section we briefly describe filters used in the analysis of the output molecules. As can be seen in Table S1, there are 5 different medical filters have been used. All filters rely on the empirical rules that certain molecules are highly likely to be useful. These rules are listed in the Constraints columns.

| Filter                                                           | Constraints                                                                                                                                                                                                                                                         |
|------------------------------------------------------------------|---------------------------------------------------------------------------------------------------------------------------------------------------------------------------------------------------------------------------------------------------------------------|
| Lipinski rule of 5 <sup>1</sup> (at most 1 violation is allowed) | Molecular weight $\leq 500$<br>LogP $\leq 5.0$<br>H-bond donor count $\leq 5$<br>H-bond acceptor count $\leq 10$                                                                                                                                                    |
| Ghose <sup>2</sup>                                               | Molecular weight between 160 and 480<br>LogP between -0.4 and +5.6<br>Atom count between 20 and 70<br>Molar refractivity between 40 and 130                                                                                                                         |
| Veber <sup>3</sup>                                               | Rotatable bonds $\leq 10$<br>Topological polar surface area $\leq 140$                                                                                                                                                                                              |
| Rule of 3 <sup>4</sup>                                           | Molecular weight $\leq 300$<br>LogP $\leq 3$<br>H-bond donor $\leq 3$<br>H-bond acceptor count $\leq 3$<br>Rotatable bond count $\leq 3$                                                                                                                            |
| REOS <sup>5</sup>                                                | Molecular weight between 200 and 500<br>LogP between -5.0 and +5.0<br>H-bond donor count between 0 and 5<br>H-bond acceptor count between 0 and 10<br>Formal charge between -2 and +2<br>Rotatable bond count between 0 and 8<br>Heavy atom count between 15 and 50 |

Table S1: Description of filters used

### S2 Adjusting beam search

#### S2.1 Adjusting beam search

To find the optimal parameters for the beam search a grid search has been conducted. A random molecule from the test set has been selected for the testing. Figure S1 shows the relation between 3 parameters (*Beam width*, *Topk* (the desired number of generated molecules), *Generated* (actual number of generated molecules), and 2 metrics (number of valid molecules and the fraction of valid molecules in the generated set). The chart demonstrates a dependency between *Beam width* and *Topk* (number of generated molecules)). In addition, for small numbers of *Topk*, the fraction of valid molecules is high. In this paper we have used a reward function that is reliant only on the input provided by the model. Further work could investigate other possible functions. For instance, the reward function could incorporate expert knowledge.

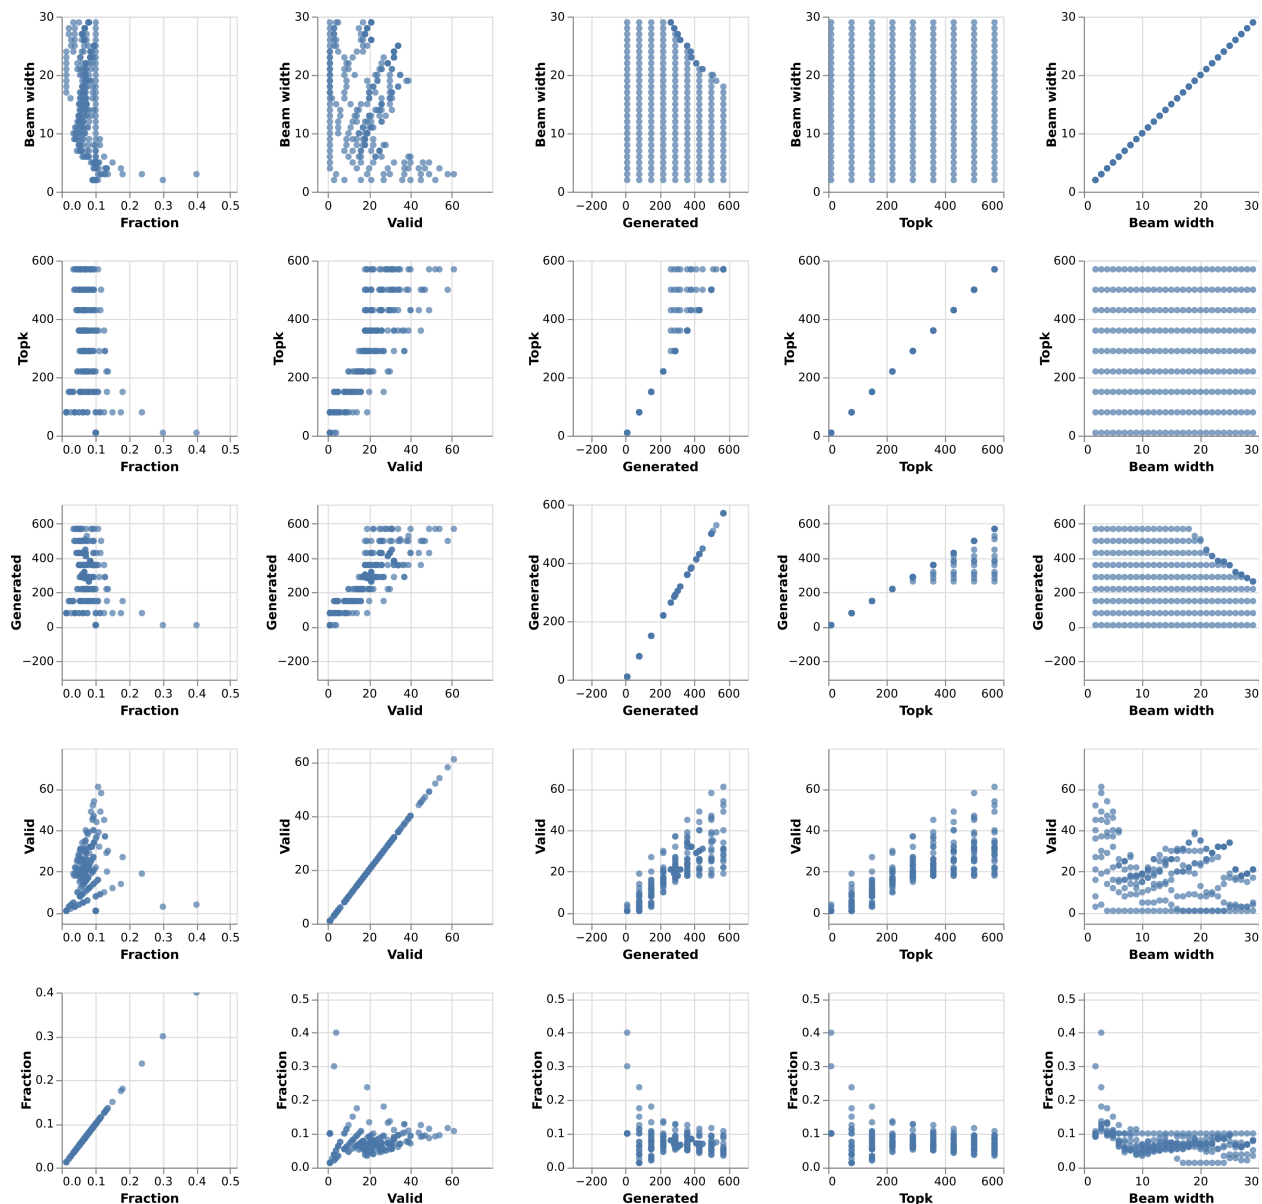

Supplemental Material, Figure S1: The scatter plot of the grid search with the following parameters: beam width, number of generation requests, actual number of generated SMILES strings, number of valid molecules, and fraction of valid molecules

### S3 Example molecules

To generate a molecule that resembles both seeds we use the special latent vector  $z_{12}$  that was created using the weighted mean of individual vectors  $z_1$  and  $z_2$ . One way to adjust the hybrid molecular output is to adjust the weights applied to individual vectors. Here we present the results of such adjustments using 3 exemplary pairs of molecules. Tables S5 to S7 contain the results of weight adjustments. In Tables S2 to S4 weights for both seeds are equal but  $\alpha$ , a beam search parameter that influences the length, is perturbed. To demonstrate that the algorithm can be adjusted to produce heavier molecules we also generated molecular output with sampling reward 1.9 and 2.5 which can be seen in Tables S8 and S9.

| Seed molecule 1 |                 |        |     |      |        |                       |       |       |        |                       |       |       |        | Seed molecule 2           |       |       |        |            |            |            |            |            |  |  |  |  |  |
|-----------------|-----------------|--------|-----|------|--------|-----------------------|-------|-------|--------|-----------------------|-------|-------|--------|---------------------------|-------|-------|--------|------------|------------|------------|------------|------------|--|--|--|--|--|
| No              | Sampling reward | Length |     |      |        | Tanimoto similarity 1 |       |       |        | Tanimoto similarity 2 |       |       |        | Tanimoto similarity (1+2) |       |       |        | Molecule 1 | Molecule 2 | Molecule 3 | Molecule 4 | Molecule 5 |  |  |  |  |  |
|                 |                 | min    | max | mean | median | min                   | max   | mean  | median | min                   | max   | mean  | median | min                       | max   | mean  | median |            |            |            |            |            |  |  |  |  |  |
| 1               | 4               | 13     | 20  | 16.2 | 16     | 0.223                 | 0.486 | 0.376 | 0.369  | 0.189                 | 0.521 | 0.275 | 0.256  | 0.46                      | 0.885 | 0.651 | 0.645  |            |            |            |            |            |  |  |  |  |  |
| 2               | 3.7             | 13     | 20  | 16.2 | 16     | 0.223                 | 0.486 | 0.371 | 0.367  | 0.189                 | 0.521 | 0.265 | 0.25   | 0.46                      | 0.885 | 0.635 | 0.638  |            |            |            |            |            |  |  |  |  |  |
| 3               | 3.4             | 13     | 20  | 15.9 | 16     | 0.223                 | 0.486 | 0.368 | 0.369  | 0.168                 | 0.521 | 0.262 | 0.242  | 0.46                      | 0.916 | 0.63  | 0.633  |            |            |            |            |            |  |  |  |  |  |
| 4               | 3.1             | 11     | 21  | 16.2 | 16     | 0.223                 | 0.486 | 0.374 | 0.378  | 0.168                 | 0.487 | 0.255 | 0.242  | 0.46                      | 0.916 | 0.629 | 0.637  |            |            |            |            |            |  |  |  |  |  |
| 5               | 2.8             | 10     | 21  | 15.9 | 16     | 0.223                 | 1     | 0.39  | 0.377  | 0.166                 | 0.487 | 0.262 | 0.246  | 0.46                      | 1.3   | 0.652 | 0.635  |            |            |            |            |            |  |  |  |  |  |
| 6               | 2.5             | 10     | 23  | 16.2 | 16     | 0.223                 | 1     | 0.389 | 0.37   | 0.166                 | 0.521 | 0.262 | 0.246  | 0.46                      | 1.3   | 0.651 | 0.628  |            |            |            |            |            |  |  |  |  |  |
| 7               | 2.2             | 10     | 22  | 16   | 16     | 0.223                 | 1     | 0.386 | 0.368  | 0.162                 | 0.521 | 0.26  | 0.241  | 0.46                      | 1.3   | 0.645 | 0.618  |            |            |            |            |            |  |  |  |  |  |
| 8               | 1.9             | 5      | 22  | 15.6 | 16     | 0.175                 | 1     | 0.381 | 0.372  | 0.159                 | 0.521 | 0.265 | 0.241  | 0.334                     | 1.3   | 0.646 | 0.617  |            |            |            |            |            |  |  |  |  |  |
| 9               | 1.6             | 1      | 22  | 14.7 | 15     | 0                     | 1     | 0.37  | 0.365  | 0                     | 0.521 | 0.271 | 0.248  | 0                         | 1.3   | 0.641 | 0.616  |            |            |            |            |            |  |  |  |  |  |
| 10              | 1.35            | 1      | 19  | 14   | 15     | 0                     | 1     | 0.364 | 0.358  | 0                     | 0.702 | 0.28  | 0.255  | 0                         | 1.3   | 0.644 | 0.63   |            |            |            |            |            |  |  |  |  |  |
| 11              | 1.3             | 1      | 20  | 13.6 | 15     | 0                     | 1     | 0.363 | 0.363  | 0                     | 0.516 | 0.288 | 0.272  | 0                         | 1.3   | 0.651 | 0.628  |            |            |            |            |            |  |  |  |  |  |
| 12              | 1.2             | 1      | 19  | 13.3 | 14     | 0                     | 1     | 0.356 | 0.356  | 0                     | 0.702 | 0.284 | 0.265  | 0                         | 1.3   | 0.64  | 0.633  |            |            |            |            |            |  |  |  |  |  |
| 13              | 1.05            | 1      | 19  | 12.6 | 13     | 0                     | 1     | 0.349 | 0.354  | 0                     | 0.516 | 0.289 | 0.283  | 0                         | 1.3   | 0.639 | 0.639  |            |            |            |            |            |  |  |  |  |  |
| 14              | 0.9             | 1      | 19  | 11.7 | 12     | 0                     | 1     | 0.339 | 0.353  | 0                     | 0.516 | 0.291 | 0.294  | 0                         | 1.3   | 0.629 | 0.642  |            |            |            |            |            |  |  |  |  |  |
| 15              | 0.75            | 1      | 19  | 10.9 | 11     | 0                     | 0.893 | 0.328 | 0.352  | 0                     | 0.524 | 0.289 | 0.29   | 0                         | 1.18  | 0.617 | 0.634  |            |            |            |            |            |  |  |  |  |  |
| 16              | 0.6             | 1      | 19  | 9.53 | 10     | 0                     | 0.893 | 0.31  | 0.333  | 0                     | 0.516 | 0.278 | 0.287  | 0                         | 1.18  | 0.588 | 0.633  |            |            |            |            |            |  |  |  |  |  |
| 17              | 0.45            | 1      | 17  | 8.23 | 8      | 0                     | 0.706 | 0.287 | 0.314  | 0                     | 0.516 | 0.268 | 0.294  | 0                         | 1.12  | 0.555 | 0.627  |            |            |            |            |            |  |  |  |  |  |
| 18              | 0.3             | 1      | 16  | 7.39 | 7      | 0                     | 0.694 | 0.263 | 0.305  | 0                     | 0.516 | 0.253 | 0.286  | 0                         | 1.12  | 0.516 | 0.596  |            |            |            |            |            |  |  |  |  |  |
| 19              | 0.15            | 1      | 14  | 6.45 | 6      | 0                     | 0.694 | 0.236 | 0.246  | 0                     | 0.516 | 0.233 | 0.258  | 0                         | 1.12  | 0.469 | 0.502  |            |            |            |            |            |  |  |  |  |  |
| 20              | 0               | 1      | 14  | 6.03 | 6      | 0                     | 0.492 | 0.222 | 0.22   | 0                     | 0.516 | 0.223 | 0.238  | 0                         | 1.01  | 0.445 | 0.468  |            |            |            |            |            |  |  |  |  |  |

Table S2: Comparison of sampling reward for the first pair of molecules

| Seed molecule 1 |                 |            |     |      |        |                   |       |       |        |                   |       |       |        |                  |      | Seed molecule 2 |        |                                                                                       |                                                                                       |                                                                                       |                                                                                       |                                                                                       |  |  |  |  |  |  |  |  |  |
|-----------------|-----------------|------------|-----|------|--------|-------------------|-------|-------|--------|-------------------|-------|-------|--------|------------------|------|-----------------|--------|---------------------------------------------------------------------------------------|---------------------------------------------------------------------------------------|---------------------------------------------------------------------------------------|---------------------------------------------------------------------------------------|---------------------------------------------------------------------------------------|--|--|--|--|--|--|--|--|--|
| No              | Sampling reward | Length min |     |      |        | Tanimoto mol1 min |       |       |        | Tanimoto mol2 min |       |       |        | Tanimoto sum min |      |                 |        | Molecule 1                                                                            | Molecule 2                                                                            | Molecule 3                                                                            | Molecule 4                                                                            | Molecule 5                                                                            |  |  |  |  |  |  |  |  |  |
|                 |                 | min        | max | mean | median | min               | max   | mean  | median | min               | max   | mean  | median | min              | max  | mean            | median |                                                                                       |                                                                                       |                                                                                       |                                                                                       |                                                                                       |  |  |  |  |  |  |  |  |  |
| 1               | 2.5             | 13         | 23  | 17.3 | 17     | 0.258             | 0.438 | 0.346 | 0.348  | 0.18              | 1     | 0.355 | 0.268  | 0.438            | 1.32 | 0.701           | 0.657  |    |    |    |    |    |  |  |  |  |  |  |  |  |  |
| 2               | 2.1             | 13         | 26  | 15.7 | 15     | 0.229             | 0.5   | 0.352 | 0.327  | 0.176             | 1     | 0.343 | 0.317  | 0.476            | 1.32 | 0.695           | 0.67   |    |    |    |    |    |  |  |  |  |  |  |  |  |  |
| 3               | 1.7             | 10         | 22  | 15.4 | 15     | 0.228             | 0.5   | 0.352 | 0.329  | 0.176             | 1     | 0.346 | 0.318  | 0.476            | 1.32 | 0.698           | 0.645  |    |    |    |    |    |  |  |  |  |  |  |  |  |  |
| 4               | 1.35            | 1          | 26  | 14.8 | 15     | 0                 | 0.498 | 0.348 | 0.374  | 0                 | 1     | 0.321 | 0.288  | 0                | 1.32 | 0.669           | 0.646  |    |    |    |    |    |  |  |  |  |  |  |  |  |  |
| 5               | 1.3             | 1          | 22  | 14.3 | 15     | 0                 | 0.5   | 0.344 | 0.334  | 0                 | 1     | 0.332 | 0.31   | 0                | 1.32 | 0.676           | 0.677  |    |    |    |    |    |  |  |  |  |  |  |  |  |  |
| 6               | 1.2             | 1          | 20  | 14.4 | 15     | 0                 | 0.498 | 0.341 | 0.373  | 0                 | 1     | 0.321 | 0.305  | 0                | 1.32 | 0.662           | 0.652  |    |    |    |    |    |  |  |  |  |  |  |  |  |  |
| 7               | 1.05            | 1          | 20  | 12.9 | 15     | 0                 | 0.5   | 0.313 | 0.337  | 0                 | 1     | 0.302 | 0.301  | 0                | 1.32 | 0.615           | 0.641  |   |   |   |   |   |  |  |  |  |  |  |  |  |  |
| 8               | 0.9             | 1          | 20  | 12   | 14     | 0                 | 0.5   | 0.305 | 0.329  | 0                 | 1     | 0.295 | 0.293  | 0                | 1.32 | 0.599           | 0.634  |  |  |  |  |  |  |  |  |  |  |  |  |  |  |
| 9               | 0.75            | 1          | 20  | 10.7 | 13     | 0                 | 0.5   | 0.284 | 0.322  | 0                 | 1     | 0.276 | 0.288  | 0                | 1.32 | 0.559           | 0.613  |  |  |  |  |  |  |  |  |  |  |  |  |  |  |
| 10              | 0.6             | 1          | 20  | 9.92 | 10     | 0                 | 0.5   | 0.278 | 0.322  | 0                 | 1     | 0.273 | 0.291  | 0                | 1.32 | 0.551           | 0.625  |  |  |  |  |  |  |  |  |  |  |  |  |  |  |
| 11              | 0.45            | 1          | 18  | 9.1  | 8      | 0                 | 0.498 | 0.271 | 0.323  | 0                 | 0.702 | 0.261 | 0.291  | 0                | 1.08 | 0.533           | 0.625  |  |  |  |  |  |  |  |  |  |  |  |  |  |  |
| 12              | 0.3             | 1          | 18  | 8.4  | 8      | 0                 | 0.498 | 0.257 | 0.312  | 0                 | 0.702 | 0.249 | 0.281  | 0                | 1.08 | 0.506           | 0.598  |  |  |  |  |  |  |  |  |  |  |  |  |  |  |
| 13              | 0.15            | 1          | 19  | 7.26 | 7      | 0                 | 0.516 | 0.236 | 0.259  | 0                 | 0.524 | 0.227 | 0.249  | 0                | 1.04 | 0.463           | 0.541  |  |  |  |  |  |  |  |  |  |  |  |  |  |  |
| 14              | 0               | 1          | 17  | 6.71 | 7      | 0                 | 0.547 | 0.226 | 0.203  | 0                 | 0.556 | 0.22  | 0.206  | 0                | 1.1  | 0.446           | 0.409  |  |  |  |  |  |  |  |  |  |  |  |  |  |  |

Table S3: Comparison of sampling reward for the second pair of molecules

| Seed molecule 1 |                 |            |     |      |        |                   |       |       |        |                   | Seed molecule 2 |       |        |                  |       |       |        |                                                                                     |                                                                                     |                                                                                     |                                                                                     |                                                                                     |                                                                                     |
|-----------------|-----------------|------------|-----|------|--------|-------------------|-------|-------|--------|-------------------|-----------------|-------|--------|------------------|-------|-------|--------|-------------------------------------------------------------------------------------|-------------------------------------------------------------------------------------|-------------------------------------------------------------------------------------|-------------------------------------------------------------------------------------|-------------------------------------------------------------------------------------|-------------------------------------------------------------------------------------|
| No              | Sampling reward | Length min |     |      |        | Tanimoto mol1 min |       |       |        | Tanimoto mol2 min |                 |       |        | Tanimoto sum min |       |       |        | Molecule 1                                                                          | Molecule 2                                                                          | Molecule 3                                                                          | Molecule 4                                                                          | Molecule 5                                                                          |                                                                                     |
|                 |                 | min        | max | mean | median | min               | max   | mean  | median | min               | max             | mean  | median | min              | max   | mean  | median |                                                                                     |                                                                                     |                                                                                     |                                                                                     |                                                                                     |                                                                                     |
| 1               | 6.7             | 36         | 36  | 36   | 36     | 0.36              | 0.36  | 0.36  | 0.36   | 0.426             | 0.426           | 0.426 | 0.426  | 0.786            | 0.786 | 0.786 | 0.786  |    |                                                                                     |                                                                                     |                                                                                     |                                                                                     |                                                                                     |
| 2               | 6.1             | 36         | 36  | 36   | 36     | 0.36              | 0.36  | 0.36  | 0.36   | 0.426             | 0.426           | 0.426 | 0.426  | 0.786            | 0.786 | 0.786 | 0.786  |    |                                                                                     |                                                                                     |                                                                                     |                                                                                     |                                                                                     |
| 3               | 5.5             | 36         | 36  | 36   | 36     | 0.36              | 0.36  | 0.36  | 0.36   | 0.426             | 0.426           | 0.426 | 0.426  | 0.786            | 0.786 | 0.786 | 0.786  |    |                                                                                     |                                                                                     |                                                                                     |                                                                                     |                                                                                     |
| 4               | 4.9             | 36         | 36  | 36   | 36     | 0.36              | 0.36  | 0.36  | 0.36   | 0.426             | 0.426           | 0.426 | 0.426  | 0.786            | 0.786 | 0.786 | 0.786  |    |                                                                                     |                                                                                     |                                                                                     |                                                                                     |                                                                                     |
| 5               | 4.3             | 36         | 36  | 36   | 36     | 0.36              | 0.36  | 0.36  | 0.36   | 0.426             | 0.426           | 0.426 | 0.426  | 0.786            | 0.786 | 0.786 | 0.786  |    |                                                                                     |                                                                                     |                                                                                     |                                                                                     |                                                                                     |
| 6               | 3.7             | 36         | 36  | 36   | 36     | 0.36              | 0.36  | 0.36  | 0.36   | 0.426             | 0.426           | 0.426 | 0.426  | 0.786            | 0.786 | 0.786 | 0.786  |    |                                                                                     |                                                                                     |                                                                                     |                                                                                     |                                                                                     |
| 7               | 3.1             | 36         | 36  | 36   | 36     | 0.36              | 0.36  | 0.36  | 0.36   | 0.426             | 0.426           | 0.426 | 0.426  | 0.786            | 0.786 | 0.786 | 0.786  |    |                                                                                     |                                                                                     |                                                                                     |                                                                                     |                                                                                     |
| 8               | 2.5             | 36         | 36  | 36   | 36     | 0.36              | 0.372 | 0.365 | 0.362  | 0.426             | 0.5             | 0.453 | 0.435  | 0.786            | 0.862 | 0.818 | 0.807  |    |    |    |                                                                                     |                                                                                     |                                                                                     |
| 9               | 1.9             | 30         | 44  | 35.6 | 36     | 0.349             | 0.42  | 0.373 | 0.367  | 0.409             | 0.501           | 0.447 | 0.433  | 0.784            | 0.862 | 0.82  | 0.82   |    |    |    |    |    |    |
| 10              | 1.35            | 1          | 32  | 9.55 | 9      | 0                 | 0.531 | 0.322 | 0.362  | 0                 | 0.531           | 0.322 | 0.363  | 0                | 1.06  | 0.644 | 0.724  |  |  |  |  |  |  |
| 11              | 1.3             | 1          | 20  | 9.13 | 9      | 0                 | 0.406 | 0.234 | 0.234  | 0                 | 0.406           | 0.233 | 0.234  | 0                | 0.812 | 0.467 | 0.469  |  |  |  |  |  |  |
| 12              | 1.2             | 1          | 32  | 9.07 | 7.5    | 0                 | 0.547 | 0.297 | 0.348  | 0                 | 0.547           | 0.297 | 0.352  | 0                | 1.09  | 0.594 | 0.704  |  |  |  |  |  |  |
| 13              | 1.05            | 1          | 32  | 7.76 | 7      | 0                 | 0.547 | 0.264 | 0.258  | 0                 | 0.547           | 0.264 | 0.258  | 0                | 1.09  | 0.528 | 0.516  |  |  |  |  |  |  |
| 14              | 0.9             | 1          | 13  | 6.33 | 6      | 0                 | 0.547 | 0.244 | 0.219  | 0                 | 0.547           | 0.244 | 0.219  | 0                | 1.09  | 0.487 | 0.438  |  |  |  |  |  |  |
| 15              | 0.75            | 1          | 13  | 6.34 | 6      | 0                 | 0.547 | 0.239 | 0.203  | 0                 | 0.547           | 0.239 | 0.203  | 0                | 1.09  | 0.477 | 0.406  |  |  |  |  |  |  |
| 16              | 0.6             | 1          | 13  | 6.25 | 6      | 0                 | 0.547 | 0.228 | 0.203  | 0                 | 0.547           | 0.228 | 0.203  | 0                | 1.09  | 0.456 | 0.406  |  |  |  |  |  |  |
| 17              | 0.45            | 1          | 13  | 5.98 | 6      | 0                 | 0.547 | 0.216 | 0.188  | 0                 | 0.547           | 0.216 | 0.188  | 0                | 1.09  | 0.432 | 0.375  |  |  |  |  |  |  |
| 18              | 0.3             | 1          | 13  | 5.73 | 6      | 0                 | 0.547 | 0.204 | 0.156  | 0                 | 0.547           | 0.204 | 0.156  | 0                | 1.09  | 0.408 | 0.312  |  |  |  |  |  |  |
| 19              | 0.15            | 1          | 13  | 5.6  | 6      | 0                 | 0.547 | 0.196 | 0.156  | 0                 | 0.547           | 0.196 | 0.156  | 0                | 1.09  | 0.393 | 0.312  |  |  |  |  |  |  |
| 20              | 0               | 1          | 12  | 5.48 | 6      | 0                 | 0.547 | 0.188 | 0.156  | 0                 | 0.547           | 0.188 | 0.156  | 0                | 1.09  | 0.377 | 0.312  |  |  |  |  |  |  |

Table S4: Comparison of sampling reward for the third pair of molecules

| Seed molecule 1                                                                   |          |          | Seed molecule 2                                                                     |                                                                                     |                                                                                      |                                                                                       |                                                                                       |
|-----------------------------------------------------------------------------------|----------|----------|-------------------------------------------------------------------------------------|-------------------------------------------------------------------------------------|--------------------------------------------------------------------------------------|---------------------------------------------------------------------------------------|---------------------------------------------------------------------------------------|
| 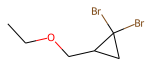 |          |          |    |                                                                                     |                                                                                      |                                                                                       |                                                                                       |
| No                                                                                | Weight 1 | Weight 2 | Molecule 1                                                                          | Molecule 2                                                                          | Molecule 3                                                                           | Molecule 4                                                                            | Molecule 5                                                                            |
| 1                                                                                 | 0.15     | 0.85     |    |    |    |    |    |
| 2                                                                                 | 0.25     | 0.75     |    |    |    |    |    |
| 3                                                                                 | 0.35     | 0.65     |    |    |    |    |    |
| 4                                                                                 | 0.45     | 0.55     |   |   |   |   |   |
| 5                                                                                 | 0.55     | 0.45     |  |  |  |  |  |
| 6                                                                                 | 0.65     | 0.35     |  |  |  |  |  |
| 7                                                                                 | 0.75     | 0.25     |  |  |  |  |  |
| 8                                                                                 | 0.85     | 0.15     |  |  |  |  |  |

Table S5: Comparison of weights for the first pair of molecules with sampling reward 0.75

| Seed molecule 1                                                                   |          |          | Seed molecule 2                                                                     |                                                                                     |                                                                                      |                                                                                       |                                                                                       |
|-----------------------------------------------------------------------------------|----------|----------|-------------------------------------------------------------------------------------|-------------------------------------------------------------------------------------|--------------------------------------------------------------------------------------|---------------------------------------------------------------------------------------|---------------------------------------------------------------------------------------|
| 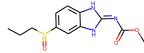 |          |          |    |                                                                                     |                                                                                      |                                                                                       |                                                                                       |
| No                                                                                | Weight 1 | Weight 2 | Molecule 1                                                                          | Molecule 2                                                                          | Molecule 3                                                                           | Molecule 4                                                                            | Molecule 5                                                                            |
| 1                                                                                 | 0.15     | 0.85     |    |    |    |    |    |
| 2                                                                                 | 0.25     | 0.75     |    |    |    |    |    |
| 3                                                                                 | 0.35     | 0.65     |    |    |    |    |    |
| 4                                                                                 | 0.45     | 0.55     |   |   |   |   |   |
| 5                                                                                 | 0.55     | 0.45     |  |  |  |  |  |
| 6                                                                                 | 0.65     | 0.35     |  |  |  |  |  |
| 7                                                                                 | 0.75     | 0.25     |  |  |  |  |  |
| 8                                                                                 | 0.85     | 0.15     |  |  |  |  |  |

Table S6: Comparison of weights for the second pair of molecules with sampling reward 0.75

| Seed molecule 1 |          |          | Seed molecule 2 |            |            |            |            |
|-----------------|----------|----------|-----------------|------------|------------|------------|------------|
|                 |          |          |                 |            |            |            |            |
| No              | Weight 1 | Weight 2 | Molecule 1      | Molecule 2 | Molecule 3 | Molecule 4 | Molecule 5 |
| 1               | 0.15     | 0.85     |                 |            |            |            |            |
| 2               | 0.25     | 0.75     |                 |            |            |            |            |
| 3               | 0.35     | 0.65     |                 |            |            |            |            |
| 4               | 0.45     | 0.55     |                 |            |            |            |            |
| 5               | 0.55     | 0.45     |                 |            |            |            |            |
| 6               | 0.65     | 0.35     |                 |            |            |            |            |
| 7               | 0.75     | 0.25     |                 |            |            |            |            |
| 8               | 0.85     | 0.15     |                 |            |            |            |            |

Table S7: Comparison of weights for the third pair of molecules with sampling reward 0.75



| Seed molecule 1 |          |          | Seed molecule 2 |            |            |            |            |
|-----------------|----------|----------|-----------------|------------|------------|------------|------------|
|                 |          |          |                 |            |            |            |            |
| No              | Weight 1 | Weight 2 | Molecule 1      | Molecule 2 | Molecule 3 | Molecule 4 | Molecule 5 |
| 1               | 0.15     | 0.85     |                 |            |            |            |            |
| 2               | 0.25     | 0.75     |                 |            |            |            |            |
| 3               | 0.35     | 0.65     |                 |            |            |            |            |
| 4               | 0.45     | 0.55     |                 |            |            |            |            |
| 5               | 0.55     | 0.45     |                 |            |            |            |            |
| 6               | 0.65     | 0.35     |                 |            |            |            |            |
| 7               | 0.75     | 0.25     |                 |            |            |            |            |
| 8               | 0.85     | 0.15     |                 |            |            |            |            |

Table S8: Comparison of weights for the third pair of molecules with sampling reward 1.9

| Seed molecule 1 |          |          | Seed molecule 2 |            |            |            |            |
|-----------------|----------|----------|-----------------|------------|------------|------------|------------|
|                 |          |          |                 |            |            |            |            |
| No              | Weight 1 | Weight 2 | Molecule 1      | Molecule 2 | Molecule 3 | Molecule 4 | Molecule 5 |
| 1               | 0.15     | 0.85     |                 |            |            |            |            |
| 2               | 0.25     | 0.75     |                 |            |            |            |            |
| 3               | 0.35     | 0.65     |                 |            |            |            |            |
| 4               | 0.45     | 0.55     |                 |            |            |            |            |
| 5               | 0.55     | 0.45     |                 |            |            |            |            |
| 6               | 0.65     | 0.35     |                 |            |            |            |            |
| 7               | 0.75     | 0.25     |                 |            |            |            |            |
| 8               | 0.85     | 0.15     |                 |            |            |            |            |

Table S9: Comparison of weights for the third pair of molecules with sampling reward 2.5

## S4 List of vitamin D analogues

### S4.1 Sample 1

#### S4.1.1 Training set

C=C1C(=CC=C2CCCC3(C)C2CCC3C(C)CCCC(C)(C)O)CC(O)CC1O  
C=C1C(O)CC(=CC=C2CCCC3(C)C2CCC3C(C)C(C)CCC(C)(C)O)CC1O  
CCC(CC)(c1ccc(OCC(O)C(C)(C)C)c(C)c1)c1ccc(OCC(O)CCO)c(C)c1  
CC(=O)N1CCN(C(=O)Cn2c(-c3ccc(Cl)cc3)csc2=N)CC1  
CCC(CC)(c1ccc(OCC(=O)C(C)(C)C)c(C)c1)c1ccc(C(=O)NCC(=O)OC)n1C  
C=C1C(=CC=C2CCCC3(C)C2CCC3C(C)CCCC(C)(C)O)CC(O)C(Cc2cncn2)C1O  
C=C1C(=CC=C2CCCC3(C)C2CCC3C(C)CC2CC(C)(O)C(=O)N2Cc2cc(OC)cc(OC)c2)CC(O)CC1O  
CC(CCCNC(=O)CS)C1CCC2C(=CC=C3CC(O)CC(O)C3)CCCC21C  
CC(C=CCC(O)C12CCC3CC(C(C3)C1)C2)C1CCC2C(=CC=C3CC(O)CC(O)C3)CCCC21C  
CCn1c(C(=O)NC(O)CCO)ccc1C(CC)(CC)c1ccc(OCC(O)C(C)(C)C)c(C)c1  
CCn1c(C(=O)NC(C)CO)ccc1C(CC)(CC)c1ccc(OCC(O)C(C)(C)C)c(C)c1  
C=C1C(=CC=C2CCCC3(C)C2CCC3C(C)CSc2ccc(C(C)(C)O)cc2)CC(O)CC1O  
C=C1C(=CC=C2CCCC3(C)C2CCC3C(C)CC(C)C)CC(O)C(=CCO)C1O  
C=C1C(=CC=C2CCC(C)CCCC(C)(C)O)C3(C)C2CCC3C(C)CO)CC(O)CC1O  
COc1ccc2c(C(Nc3ccc(Cl)cc3)c3ccccc3Cl)c(C)[nH]c2c1  
COc1ccccc1NC(c1ccccc1Cl)c1c(C)[nH]c2ccccc12  
CC(=O)N1CCN(C(=O)Cn2c(-c3ccc(C)cc3)csc2=N)CC1  
C=C1C(=CC=C2CCCC3(C)C2CCC3C(C)CC2CC(C)(O)C(=O)N2CCCCc2ccccc2)CC(O)CC1O  
C=C1C(O)CC(=CC=C2CCCC3(C)C2CCC3C(C)C(CC)CC(C)(C)O)CC1O  
CC(C=CC(=O)Nc1ccccc1N)=CC(C)C1CCC2C(=CC=C3CC(O)CC(O)C3)CCCC21C  
Cc1ccc2c(C(NC3ccc(C(F)(F)F)cc3)c3ccccc3Cl)c(C)[nH]c2c1  
C=C1C(=CC=C2CCCC3(C)C2CCC3C(C)CCCC(C)(C)O)CC(O)C(Cc2cncn2)C1O  
N=c1scc(-c2ccccc2)n1CC(=O)N1CCN(c2ccccc2)CC1  
CC(CCCC(C)(C)O)C1CCC2C(=CC=C3CC(O)C4=CCOC4C3)CCCC21C  
COc1ccc(C(Nc2ccccc2)c2c(C)[nH]c3ccccc23)cc1  
C=C1C(=CC=C2CCCC3(C)C(C(C)CCCC(C)(C)O)CCC23C)CC(O)CC1O  
CCC(CC)(c1ccc(OCC(O)CO)c(C)c1)c1ccc(OCC(O)C(C)(C)C)c(C)c1  
CC(CCC(=O)O)C1CCC2C3CCC4CC(O)CCC4(C)C3CCC12C  
CCC(=CC=CC(O)(C(F)(F)F)C(F)(F)F)c1cccc(OCC2ccc(CO)c(CO)c2)c1  
CCC(CC)(c1ccc(OCC(O)C(C)(C)C)c(C)c1)c1ccc(C(=O)NC(C)CO)n1C  
Cc1[nH]c2ccccc2c1C(Nc1ccccc1)c1ccccc1Cl  
C=C1C(O)CC(=CC=C2CCCC3(C)C2CCC3C(C)C(CCCC)CCO)CC1O  
C=C1C(=CC=C2CCCC3(C)C2CCC3C(C)C(C)CCC(C)(C)O)CC(O)CC1O  
C=C1C(=CC=C2CCCC3(C)C2CCC3C(C)C=CC(O)C2(C=CC(=O)OCC)CC2)CC(O)CC1O  
Cc1ccc2c(C(Nc3ccccc3)c3ccccc3Cl)c(C)[nH]c2c1  
C=C1C(O)CC(=CC=C2CCCC3(C)C2CCC3C(C)CC#CC(O)C23CC4CC(C(C4)C2)C3)CC1O  
C=C1C(O)CC(=CC=C2CCCC3C(C)CCCC(C)(C)O)CCC23)CC1O  
C=C1C(O)CC(=CC=C2CCCC3(C)C2CCC3C(C)C(C)(C)CCC(C)(C)O)CC1O  
CN1CCN(C(=O)Cn2c(-c3ccc(Cl)cc3)csc2=N)CC1  
COc1ccc(C(Nc2ccc(OC)c(OC)c2)c2c(C)[nH]c3ccccc23)cc1  
COc1ccc(NC(c2nccs2)c2c(C)[nH]c3ccccc23)cc1OC  
CCCCS(=O)(=O)NCCCC(C)C1CCC2C(=CC=C3CC(O)CC(O)C3)CCCC21C  
CCC(=CC=CC(O)(C(F)(F)F)C(F)(F)F)c1cccc(CCC2ccc(CO)c(CO)c2)c1  
COc1ccc(C=CC2=[N+](C)c3ccc(OC)cc3C2(C)C)cc1  
N=c1scc(-c2ccc(Cl)cc2)n1CC(=O)N1CCN(c2ccccc2)CC1  
Cc1[nH]c2ccccc2c1C(NC1ccccc1)c1ccccc1Cl  
Cc1[nH]c2ccccc2c1C(Nc1ccc([N+](=O)[O-])cc1)c1ccccc1Cl  
Cc1ccc(NC(c2ccccc2Cl)c2c(C)[nH]c3ccccc23)cc1  
C=C1C(O)CC(=CC=C2CCCC3(C)C2CCC3C(C)C(CC)CC(O)(CC)CC)CC1O  
CCC(CC)(c1ccc(OCC(O)C(C)(C)C)c(C)c1)c1ccc(C(=O)NC(O)CCO)n1C  
C=C1C(O)CC(=CC=CCC(C)(C)CC(C)CCCC(C)(C)O)CC1O  
CCC(CC)(c1ccc(OCC(O)CO)c(C)c1)c1ccc(OCC(O)C(C)(C)C)c(C)c1  
COc1ccc(NC(c2ccccc2Cl)c2c(C)[nH]c3cc(C)ccc23)cc1OC

C=C1C(O)CC(=CC=C2CCCC3C2CCC3C(C)CCCC(C)(C)O)CC1O  
C=C1C(O)CC(=CC=C2CCCC3(C)C2CCC3C(C)C(CC)CCC(C)(C)O)CC1O  
CCC(=CC=CC(O)(CC)CC)c1cccc(OCc2ccc(CO)c(CO)c2)c1  
C=C1C(=CC=C2CCCC3(C)C2CCC3C(C)CCC(O)C(C)C)CC(O)CC1O  
C=C1C(=CC=C2CCCC3(C)C2CCC3C(C)CC2CC(C)(O)C(=O)N2Cc2cc(OC)c(O)CC(O)CC1O  
CCC(CC)(c1ccc(OC(=O)C(C)(C)C)c(C)c1)c1ccc(C(=O)NC(CC(=O)O)C(=O)O)n1C  
C=C1C(=CC=C2CCCC3(C)C2CCC3C(C)C(CCCC)CCC(C)(C)O)CC(O)CC1O  
Cc1[nH]c2cccc2c1C(Nc1cccc1)c1ccc(Cl)cc1  
C=C1C(=CC=C2CCCC3(C)C2CCC3C(C)CC2OC(=O)C(=C)C2CCC)CC(O)C(CCCO)C1O  
CCC(O)(CC)CSC(C)C1=CC2C(=CC=C3CC(O)C(C)(O)C(O)C3)CCCC12C  
CCC(CC)(c1ccc(OC(O)C(C)(C)C)c(C)c1)c1ccc(C(=O)NCC(=O)O)n1C  
C=C1C(=CC=C2CCCC3(C)C2CCC3C(C)CC)CC(O)C(=CCO)C1O  
CC[Si](CC)(c1ccc(OC(=O)C(C)(C)C)c(C)c1)c1ccc(OC2C02)c(C)c1  
C=C1C(=CC=C2CCCC3(C)C2CCC3C(C)C0CC(=C)C2(C)CCCC2)CC(O)CC1O  
Cc1[nH]c2cccc2c1C(Nc1ccc(N(C)C)cc1)c1cccc1Cl  
C=C1C(O)CC(=CC=C2CCCC3(C)C2CCC3C(C)C(CC)CCO)CC1O  
CC(CCCC(=O)Nc1cccc1N)C1CCC2C(=CC=C3CC(O)CC(O)C3)CCCC21C  
C=C1C(=CC=C2CCCC3(C)C2CCC3C(C)CCCC(C)(C)C)CC(O)CC1O  
C=C1C(=CC=C2CCCC3(C)C(C(C)CCC(F)(F)C(O)(CC)CC)=CC23)CC(O)CC1C(F)F  
CS(=O)(=O)c1ccc(C(=O)NCCCC(=O)N2CCN(c3ccc(C(F)(F)F)cc3)CC2)cc1[N+](=O)[O-]  
CCC(O)(CC)CSC(C)C1=CC2C(=CC=C3CC(O)C(OC(O)C(O)C3)CCCC12C  
Cc1ccc(CNC(c2cccc2Cl)c2c(C)[nH]c3cc(C)ccc23)cc1  
C=C1C(=CC=C2CCCC3(C)C2CCC3C(C)CC2OC(=O)C(=C)C2CC(C)C)CC(O)C(C)C1O  
CCCOC1C(O)CC(=CC=C2CCCC3(C)C(C(C)SCCC(O)(CC)CC)=CC23)CC1O  
Cc1ccc2c(C(Nc3ccc(OC(F)(F)F)cc3)c3cccc3Cl)c(C)[nH]c2c1  
N=c1scc(-c2ccc(Cl)cc2)n1CC(=O)N1CCOCC1  
C=C1C(O)CC(=CC=C2CCCC3(C)C2CCC3C(C)C=CC(O)C23CC4CC(CC(C4)C2)C3)CC1O  
COC(=O)c1ccc(C=CC2=[N+](C)c3ccc(OC)cc3C2(C)C)cc1  
COc1ccc(NC(c2cccc2Cl)c2c(C)[nH]c3cccc23)cc1  
COc1ccc(NC(c2ccc(OC(F)(F)F)cc2)c2c(C)[nH]c3cccc23)cc1OC  
CCCS(=O)(=O)c1oc(-c2cccs2)nc1S(=O)(=O)c1ccc(F)cc1  
C=C1C(O)CC(=CC=CCCC(C)CCCC(C)(C)O)CC1O  
CCC(CC)(c1ccc(OC(O)C(C)(C)C)c(C)c1)c1ccc(OC(CO)CO)c(C)c1  
C=C1C(=CC=C2CCCC3(C)C2CCC3C(C)CC2OC(=O)C(=C)C2CC)CC(O)CC1O  
C=C1C(=CC=C2CCCC3(C)C2CCC3C(C)CC2CC(C)(O)C(=O)N2Cc2cccc2)CC(O)CC1O  
C=C1C(=CC=C2CCCC3(C)C2CCC3C(C)CC2OC(=O)C(=C)C2CCC)CC(O)C(C)C1O  
C=C1C(=CC=C2CCCC3(C)C2CCC3C(C)C=CC(O)C2(C(=O)OCCCC)CC(O)CC1O  
C=C1C(=CC=C2CCCC3(C)C2CCC3C(C)CC2OC(=O)C(=C)C2CCCC)CC(O)CC1O  
C=C1C(=CC=C2CCCC3(C)C2CCC3C(C)CC2CC(C)(O)C(=O)N2C)CC(O)CC1O  
C=C(COCC(C)C1CCC2C(=CC=C3CC(O)CC(O)C3=C)CCCC21C)C1=CCCC1(C)C  
CCC(CC)(c1ccc(OC(O)CO)c(C)c1)c1ccc(OC(O)C(C)(C)CCc2cccc2)c(C)c1  
Cc1ccc2c(C(NC3cccc3)c3cccc3Cl)c(C)[nH]c2c1  
C=C1C(=CC=C2CCCC3(C)C2CCC3C(C)CC2OC(=O)C(=C)C2CCCC)CC(O)C(C)C1O  
C=C1C(=CC=C2CCCC3(C)C2CCC3C(C)CC2OC(=O)C(=C)C2CC)CC(O)C(C)C1O  
C=C1C(=CC=C2CCCC3(C)C2CCC3C(C)COCc2cccc2)CC(O)CC1O  
C=C1C(O)CC(=CC=C2CCCC3(C)C2CCC3C(C)C(CCO)CCCC)CC1O  
CC(CCCCCNS(N)(=O)=O)C1CCC2C(=CC=C3CC(O)CC(O)C3)CCCC21C

#### S4.1.2 Testing set

The SMILES strings of the recreated VDR ligands are highlighted in yellow.

C=C1C(O)CC(=CC=C2CCCC3(C)C2CCC3C(C)CCCC(C)O)CC1O  
C=C1C(=CC=C2CCCC3(C)C2CCC3C(C)CCCC(C)(C)O)CC(O)C(Cc2n2ncm2)C1O  
**C=C1C(=CC=C2CCCC3(C)C2CCC3C(C)C(CC)CCC(C)(C)O)CC(O)CC1O**  
CC(O)CCCC(C)C1CCC2C(=CC=C3CC(O)C(C)C(O)C3)CCCC21C  
CCC(O)(CC)CSC(C)C1=CC2C(=CC=C3CC(O)C(=CCO)C(O)C3)CCCC12C  
C=C1C(O)CC(=CC=C2CCCC3(C)C2CCC3C(C)CCC(O)(CC)CC)CC1O

CC(CCCC(C)(C)O)C1CCC2C(=CC=C3CC(O)C(=CCF)C(O)C3)CCCC21C  
 C=C1C(=CC=C2CCCC3(C)C2CCC3C(C)O)c2ccc(C(C)(C)O)c2)CC(O)CC1O  
 CCCOC1C(O)CC(=CC=C2CCCC3(C)C(C(C)SCCCC(O)(CC)CC)=CCC23)CC1O  
 C=C1C(O)CC(=CC=C2CCCC3(C)C2CCC3C(C)CCCC(C)(C)O)CC1O  
 C=C1C(O)CC(=CC=C2CCCC3(C)C2CCC3C(C)OCC(C)C(C)(C)O)CC1O  
 C=C1C(O)CC(=CC=C2CCCC3(C)C2CCC3C(C)C(CCCC)CC(C)(C)O)CC1O  
 C=C1C(=CC=C2CCCC3(C)C2CCC3C(C)CCCC(C)(C)O)CC(O)C2=CCOC12  
 C=C1C(O)CC(=CC=C2CCCC3(C)C(CCCC(C)(C)O)CCC23)CC1O  
 C=C1CCC(O)CC1=CC=C1CCCC2(C)C1CCC2C(C)CCCC(C)C  
 C=C1C(=CC=C2CCCC3(C)C2CCC3C(C)CCCC(C)(C)O)CC(O)C(Cc2c2c2)C1O  
 C=C1C(=CC=C2CCCC3(C)C2CCC3C(C)CCCC(C)(C)O)CC(O)C(Cc2c2c2)C1O  
 C=C1C(O)CC(=CC=C2CCCC3(C)C2CCC3C(C)C(CCCC)CCC(C)(C)O)CC1O  
 C=C1C(=CC=C2CCCC3(C)C2CCC3C(C)(C)CC)CC(O)C(=CCO)C1O  
 C=C1C(=CC=C2CCCC3(C)C2CCC3C(C)C=CC(O)C2CC2)CC(O)CC1O  
 C=C1C(O)CC(=CC=C2CCCC3(C)C2CCC3C(C)C(CCCC)CC(O)(CC)CC)CC1O  
 CCCc1cc(C(O)(CC)CC)c1c1cc(Cc2ccc(CO)c(CO)c2)ccc1C  
 CC(CCCC(C)(C)O)C1CCC2C(=CC=C3CC(O)CC(O)C3=O)CCCC21C  
 C=C1C(=CC=C2CCCC3(C)C(C4(CCCC(C)(C)O)CC4)=CCC23)CC(O)CC1O  
 C=C1C(=CC=C2CCCC3(C)C2CCC3C(C)CCCC(C)(C)O)CC(O)C(Cc2c2c2)C1O  
 C=C1C(=CC=C2CCCC3(C)C(C4(CCC(=O)C(C)(C)O)CC4)=CCC23)CC(O)CC1O  
 C=C1CC(C(C)C)C2CCC3C(=CC=C4CC(O)C(=C)C(O)C4)CCCC32C)OC1=O  
 C=C1C(O)CC(=CC=C2CCCC3(C)C2CCC3C(C)CC#CC(O)CC23CC4CC(C(C4)C2)C3)CC1O  
 CCC(CC)(c1ccc(OCC(O)C(C)(C)C)c(C)c1)c1ccc(OCC(O)C(O)C)C(C)c1  
 C=C1C(O)CC(=CC=C2CCCC3(C)C2CCC3C(C)C=CCC(O)C23CC4CC(C(C4)C2)C3)CC1O  
 C=C1C(=CC=C2CCCC3(C)C2CCC3C(C)C(CCO)CCCC)CC(O)CC1O  
 CCCc1cc(C(O)(CC)CC)c1c1cc(OCC2ccc(CO)c(CO)c2)ccc1CC  
 C=C1C(O)CC(=CC=CCC(C)CC(C)CCCC(C)(C)O)CC1O  
 C=C1C(O)CC(=CC=C2CCCC3(C)C2CCC3C(C)C=CCC(O)CC23CC4CC(C(C4)C2)C3)CC1O  
 C=C1C(=CC=C2CCCC3(C)C2CCC3C(C)C(CCCC)CC(O)C(C)C)CC(O)CC1O  
 CCn1c(C(=O)NC(C)C(=O)O)c1c1cc(C(C)(C)C)c(C)c1  
 C=C1C(=CC=C2CCC(C)CCCC(C)(C)O)C3(C)C2CCC3C(C)CCCC)CC(O)CC1O  
 C=C1CC(C(C)C)C2CCC3C(=CC=C4CC(O)CC(O)C4=C)CCCC32C)OC1=O  
 C=C1C(=CC=C2CCCC3(C)C2CCC3C(C)CC2OC(=O)C(=C)C2(C)C)CC(O)CC1O  
**C=C1C(=CC=C2CCCC3(C)C2CCC3C(C)CC2OC(=O)C(=C)C2CCC)CC(O)CC1O**  
 C=C1C(=CC=C2CCCC3(C)C2CCC3C(C)CC2OC(=O)C(=C)C23CCCC3)CC(O)CC1O  
 C=C1C(=O)OC(C(C)C)C2CCC3C(=CC=C4CC(O)C(CCCO)C(O)C4=C)CCCC32C)C1C  
 C=C1C(=O)OC(C(C)C)C2CCC3C(=CC=C4CC(O)C(O)C4=C)CCCC32C)C1C  
 C=C1C(=CC=C2CCCC3(C)C2CCC3C(C)CC2OC(=O)C(=C)C2CCC)CC(O)C(O)C(O)C1O  
 C=C1C(=O)OC(C(C)C)C2CCC3C(=CC=C4CC(O)C(C)C(O)C4=C)CCCC32C)C1C  
**C=C1C(O)CC(=CC=C2CCCC3(C)C2CCC3C(C)C(C)CCCC)CC1O**  
 C=C1C(=CC=C2CCCC3(C)C2CCC3C(C)CC2OC(=O)C(=C)C2C)CC(O)CC1O  
 C=C1C(=CC=C2CCCC3(C)C2CCC3C(C)CC2OC(=O)C(=C)C2CC)CC(O)C(CCCO)C1O  
 C=C1C(=CC=C2CCCC3(C)C2CCC3C(C)CC2OC(=O)C(=C)C2CC)CC(O)C(O)C(O)C1O  
 C=C1C(=CC=C2CCCC3(C)C2CCC3C(C)CC2OC(=O)C(=C)C2CCC)CC(O)C(CCCO)C1O  
 C=C1C(=CC=C2CCCC3(C)C2CCC3C(C)CC2OC(=O)C(=C)C2CCCC)CC(O)C(O)C(O)C1O  
 C=C1C(=CC=C2CCCC3(C)C2CCC3C(C)CC2OC(=O)C(=C)C2CC(C)C)CC(O)C(CCCO)C1O  
 C=C1C(=CC=C2CCCC3(C)C2CCC3C(C)CC2OC(=O)C(=C)C2CC(C)C)CC(O)C(O)C(O)C1O  
 CC(CCCC(C)(C)O)C1CCC2C(=CC=C3CC(O)C(=CCO)C(O)C3)CCCC21C  
 CC(CCCNS(=O)(=O)C(F)(F)F)C1CCC2C(=CC=C3CC(O)CC(O)C3)CCCC21C  
 CC(CCCNS(=O)(=O)c1ccccc1)C1CCC2C(=CC=C3CC(O)CC(O)C3)CCCC21C  
 C=C1C(=CC=C2CCCC3(C)C2CCC3C(C)OCCCC(O)(CC)CC)CC(O)CC1C(F)F  
 C=C1C(=CC=C2CCCC3(C)C2CCC3C(C)CCCC(C)(C)O)CC(O)CC1C(F)F  
 CCC(CC)(c1ccc(OCC(=O)C(C)(C)C)c(C)c1)c1ccc(OCC(=O)C(C)C)c(C)c1  
 C=C1C(=CC=C2CCCC3(C)C2CCC3C(C)COC#CC(C)(C)C)CC(O)CC1O  
 C=C1C(=CC=C2CCCC3(C)C2CCC3C(C)CCCC(C)(C)O)CC1O  
 C=C1C(=CC=C2CCCC3(C)C2CCC3C(C)CCCC(C)(C)O)CC2OC=C2C1O  
 C=C1C(O)CC(=CC=CCC(C)=CC(C)CCCC(C)(C)O)CC1O

C=C1C(=CC=C2CCCC3(C)C2CCC3C(C)C0CC(=C)C(C)(C)CC(0)CC10  
 CC(C=CC(=0)N0)=CC(C)C1CCC2C(=CC=C3CC(0)CC(0)C3)CCCC21C  
 CCC(CC)(c1ccc(OCC(=0)C(C)(C)C)c(C)c1)c1ccc(OCC(0)C0)c(C)c1  
**CCC(CC)(c1ccc(OCC(0)C(C)(C)C)c(C)c1)c1ccc(C(=0)NCCCC)n1C**  
 C=C1C(=CC=C2CCCC3(C)C2CCC3C(C)CC2CC(C)(0)C(=0)N2Cc2cc(OCCC)cc(OCCC)c2)CC(0)CC10  
 CC(CCCCC(=0)Nc1cccc1N)C1CCC2C(=CC=C3CC(0)CC(0)C3)CCCC21C  
 C=C1C(=CC=C2CCCC3(C)C2CCC3C(C)CC2CC(C)(0)C(=0)N2Cc2ccccc2)CC(0)CC10  
 CC(CCCNS(C)(=0)=0)C1CCC2C(=CC=C3CC(0)CC(0)C3)CCCC21C  
 CC(CCCCC(=0)N0)C1CCC2C(=CC=C3CC(0)CC(0)C3)CCCC21C  
 CC(CCCNS(N)(=0)=0)C1CCC2C(=CC=C3CC(0)CC(0)C3)CCCC21C  
 CC(CCCNS(C)(=0)=0)C1CCC2C(=CC=C3CC(0)CC(0)C3)CCCC21C  
 C=C1C(=CC=C2CCCC3(C)C2CCC3C(C)CC2CC(C)(0)C(=0)N2Cc2cc(OCCC)cc(OCCC)c2)CC(0)CC10  
 C0c1ccc(C(Nc2ccc(C(F)(F)F)cc2)c2c(C)[nH]c3ccccc23)cc1  
 Cc1ccc(NC(c2ccccc2Cl)c2c(C)[nH]c3ccccc23)cc1C  
 C=C1C(=CC=C2CCCC3(C)C2CCC3C(C)CC2CC(C)(0)C(=0)N2Cc2ccc(OC)cc2)CC(0)CC10  
 C=C1C(=CC=C2CCCC3(C)C2CCC3C(C)CC2CC(C)(0)C(=0)N2CCc2cc(OC)cc(OC)c2)CC(0)CC10  
 CCC(CC)(c1ccc(OCC(=0)C(C)(C)C)c(C)c1)c1ccc(C(=0)NCCC(=0)OC)n1C  
 C=C1C(=CC=C2CCCC3(C)C2CCC3C(C)CC2CC(C)(0)C(=0)N2CCc2cc(OC)cc(OC)c2)CC(0)CC10  
 Cc1ccc(-c2csc(=N)n2CC(=0)N2CCN(c3ccccc3)CC2)cc1  
 CCC(CC)(c1ccc(OCC(0)C(C)(C)C)c(C)c1)c1ccc(C(=0)NCCC(=0)O)n1C  
 CCn1c(C(=0)NCC(=0)OC)ccc1C(CC)(CC)c1ccc(OCC(=0)C(C)(C)C)c(C)c1  
 Nc1nc2ccc(S(=0)(=0)N3CCCC3)cc2s1  
 C=C1C(=CC=C2CCCC3(C)C2CCC3C(C)CC2CC(C)(0)C(=0)N2CCc2ccccc2)CC(0)CC10  
 CC(C)S(=0)(=0)c1oc(-c2cccs2)nc1S(=0)(=0)c1ccccc1  
 CCC(CC)(c1ccc(OCC(=0)C(C)(C)C)c(C)c1)c1ccc(C(=0)NC(C)(=0)O)n1C  
**C0c1ccc(NC(c2ccccc2Cl)c2c(C)[nH]c3ccccc23)cc10C**  
 Cc1[nH]c2ccccc2c1C(Nc1ccc(Cl)cc1)c1ccnc1  
 CC(C)CC(N)C(=0)NC(CC(C)C)C(=0)NC1C0CC(0)C(0)C0CCC(C(=0)O)NC(=0)C(CC(C)C)NC(=0)C(CC(C)C)NC(=0)C(C)(C)NC1=0  
 C0C(=0)c1ccc2c(c1)C(C)(C)C(C=Cc1ccc(OC)cc1)=[N+]2C  
 CCC(CC)(c1ccc(OCC(0)C0)c(C)c1)c1ccc(OCC(0)C(C)(C)CCCC2ccccc2)c(C)c1  
 Cc1[nH]c2ccccc2c1C(Nc1ccc(Cl)cc1)c1ccnc1  
 Cc1[nH]c2ccccc2c1C(Nc1ccc(Cl)cc1)c1nccs1  
 Cc1[nH]c2ccccc2c1C(Nc1ccc(Cl)cc1)c1ccccc1Cl  
 C0c1ccc(NC(c2ccc(C(F)(F)F)cc2)c2c(C)[nH]c3ccccc23)cc10C  
 CC(=0)N1CCN(C(=0)Cn2c(-c3ccccc3)csc2=N)CC1  
 CCS(=0)(=0)c1oc(-c2cccs2)nc1S(=0)(=0)c1ccccc1  
 Cc1ccc2c(C(Nc3ccc(Cl)cc3)c3ccccc3Cl)c(C)[nH]c2c1  
 C0c1ncccc1NC(c1ccnc1)c1c(C)[nH]c2cc(C)ccc12  
 CCn1c(C(=0)NCCO)ccc1C(CC)(CC)c1ccc(OCC(0)C(C)(C)C)c(C)c1  
 CC0c1ccc(C=CC2=[N+](C)c3ccc(C(=0)OC)cc3C2(C)C)cc1  
 Cc1ccc2c(C(Nc3ccc(C(F)(F)F)cc3)c3ccccc3Cl)c(C)[nH]c2c1  
 CC(C)CS(=0)(=0)c1oc(-c2cccs2)nc1S(=0)(=0)c1ccc(F)cc1  
 Cc1[nH]c2ccccc2c1C(Nc1ccc(Cl)cc1)c1ncc[nH]1  
 C0C(=0)c1ccc2c(c1)C(C)(C)C(C=Cc1ccc(0)cc1)=[N+]2C  
 Cc1[nH]c2ccccc2c1C(Nc1cccn1)c1ccc(C(C)C)cc1

### S4.1.3 Seeds

C=C1C(=CC=C2CCCC3(C)C2CCC3C(C)CCCC(C)(C)0)CC(0)C(CcN2cncn2)C10  
 C=C1C(=CC=C2CCCC3(C)C2CCC3C(C)CC20C(=0)C(=C)C2CCCC)CC(0)C(C)C10  
 C=C1C(=CC=C2CCC(C)CCCC(C)(C)0)C3(C)C2CCC3C(C)C0)CC(0)CC10  
 CCn1c(C(=0)NC(C)C0)ccc1C(CC)(CC)c1ccc(OCC(0)C(C)(C)C)c(C)c1  
 C=C1C(=CC=C2CCCC3(C)C2CCC3C(C)C(C)CCC(C)(C)0)CC(0)CC10  
 CCC(CC)(c1ccc(OCC(=0)C(C)(C)C)c(C)c1)c1ccc(C(=0)NCC(=0)OC)n1C  
 C=C1C(=CC=C2CCCC3(C)C2CCC3C(C)CC(C)C)CC(0)C(=CCCC)C10  
 CC(CCCNS(N)(=0)=0)C1CCC2C(=CC=C3CC(0)CC(0)C3)CCCC21C  
 CN1CCN(C(=0)Cn2c(-c3ccc(Cl)cc3)csc2=N)CC1

CCC(=CC=CC(O)(CC)CC)c1cccc(OCc2ccc(CO)c(CO)c2)c1  
 Cc1[nH]c2cccc2c1C(Nc1cccc1)cc1  
 CC(CCCC(=O)Nc1cccc1N)C1CC2C(=CC=C3CC(O)CC(O)C3)CCCC21C  
 CCC(CC)(c1ccc(OC(O)C(C)(C)C)c(C)c1)c1ccc(C(=O)NC(CO)CCO)n1C  
 CCC(CC)(c1ccc(OC(O)C(C)(C)C)c(C)c1)c1ccc(C(=O)NCC(=O)O)n1C  
 Cc1[nH]c2cccc2c1C(Nc1ccc(N(C)C)cc1)c1cccc1C1  
 COc1ccc(NC(c2cccc2C1)c2c(C)[nH]c3cccc23)cc1  
 CCC(=CC=CC(O)(C(F)(F)F)C(F)(F)F)c1cccc(OCc2ccc(CO)c(CO)c2)c1  
 Cc1ccc(CNC(c2cccc2C1)c2c(C)[nH]c3cc(C)ccc23)cc1  
 Cc1[nH]c2cccc2c1C(NC1cccc1)c1cccc1C1  
 Cc1ccc2c(C(NC3ccc(C(F)(F)F)cc3)c3cccc3C1)c(C)[nH]c2c1  
 Cc1ccc2c(C(Nc3ccnc3)c3cccc3C1)c(C)[nH]c2c1  
 C=C1C(O)CC(=CC=C2CCCC3(C)C2CCC3C(C)C(CC)CCO)CC10  
 C=C1C(=CC=C2CCCC3(C)C2CCC3C(C)CC2OC(=O)C(=C)C2CC(C)C)CC(O)C(C)C10  
 C=C1C(=CC=C2CCCC3(C)C2CCC3C(C)CC2OC(=O)C(=C)C2CC)CC(O)CC10  
 CS(=O)(=O)c1ccc(C(=O)NCCCC(=O)N2CCN(c3ccc(C(F)(F)F)cc3)CC2)cc1[N+](=O)[O-]  
 COc1ccc(C(Nc2cccn2)c2c(C)[nH]c3cccc23)cc1  
 C=C1C(=CC=C2CCCC3(C)C2CCC3C(C)CC2OC(=O)C(=C)C2CC)CC(O)C(C)C10  
 CCC(O)(CC)CSC(C)C1=CCC2C(=CC=C3CC(O)C(OC(O)C(O)C3)CCCC12C  
 C=C1C(=CC=C2CCCC3(C)C2CCC3C(C)CC2CC(C)(O)C(=O)N2Cc2cccc2)CC(O)CC10  
 CCC(O)(CC)CSC(C)C1=CCC2C(=CC=C3CC(O)C(C)(O)C(O)C3)CCCC12C

## S4.2 Sample 2

### S4.2.1 Training set

C=C1C(=CC=C2CCCC3(C)C2CCC3C(C)CCCC(C)(C)O)CC2OCC=C2C10  
 Cc1ccc2c(C(NC3cccc3)c3cccc3C1)c(C)[nH]c2c1  
 C=C1CC(CC(C)C2CCC3C(=CC=C4CC(O)CC(O)C4=C)CCCC32C)OC1=O  
 Cc1ccc(NC(c2cccc2C1)c2c(C)[nH]c3cccc23)cc1  
 C=C1C(=CC=C2CCCC3(C)C2CCC3C(C)C(CCCC)CC(O)C(C)C)CC(O)CC10  
 C=C1C(O)CC(=CC=C2CCCC3(C)C2CCC3C(C)C(C)CCC(C)(C)O)CC10  
 CCC(CC)(c1ccc(OC(O)C(C)(C)C)c(C)c1)c1ccc(C(=O)NCCCC)n1C  
 C=C1C(O)CC(=CC=C2CCCC3(C)C2CCC3C(C)C(CC)CCO)CC10  
 CCC(CC)(c1ccc(OC(O)C(C)(C)C)c(C)c1)c1ccc(OC(O)C(O)CO)c(C)c1  
 CC(CCCC(=O)Nc1cccc1N)C1CC2C(=CC=C3CC(O)CC(O)C3)CCCC21C  
 CC(=O)N1CCN(C(=O)Cn2c(-c3ccc(C1)cc3)csc2=N)CC1  
 N=c1scc(-c2ccc(C1)cc2)n1CC(=O)N1CCOCC1  
 CCn1c(C(=O)NC(C)CO)ccc1C(CC)(CC)c1ccc(OC(O)C(C)(C)C)c(C)c1  
 CCC(CC)(c1ccc(OC(O)C(C)(C)C)c(C)c1)c1ccc(OC(O)CCO)c(C)c1  
 COc1ccc(NC(c2ccc(OC(F)(F)F)cc2)c2c(C)[nH]c3cccc23)cc10C  
 C=C1C(=CC=C2CCCC3(C)C2CCC3C(C)CCCC(C)(C)O)CC(O)CC10  
 C=C1C(O)CC(=CC=C2CCCC3(C)C2CCC3C(C)C(CCCC)CC(C)(C)O)CC10  
 COc1ccc(NC(c2cccc2C1)c2c(C)[nH]c3cccc23)cc10C  
 C=C1C(=CC=C2CCCC3(C)C2CCC3C(C)CC2OC(=O)C(=C)C2CC(C)C)CC(O)CC10  
 CC[Si](CC)(c1ccc(OC(=O)C(C)(C)C)c(C)c1)c1ccc(OC2CO2)c(C)c1  
 CC(C)S(=O)(=O)c1oc(-c2cccs2)nc1S(=O)(=O)c1cccc1  
 C=C1C(=O)OC(CC(C)C2CCC3C(=CC=C4CC(O)C(OC(O)C(O)C4=C)CCCC32C)C1C  
 CC(C)CS(=O)(=O)c1oc(-c2cccs2)nc1S(=O)(=O)c1ccc(F)cc1  
 CCS(=O)(=O)c1oc(-c2cccs2)nc1S(=O)(=O)c1cccc1  
 C=C1C(O)CC(=CC=C2CCCC3(C)C2CCC3C(C)CCCC(C)O)CC10  
 COCOCC=C1C(O)CC(=CC=C2CCCC3(C)C2CCC3C(C)CCCC(C)(C)O)CC10  
 C=C1C(=CC=C2CCCC3(C)C2CCC3C(C)CCCC(C)(C)O)CC(O)C(CN2cnm2)C10  
 CCC(CC)(c1ccc(OC(=O)C(C)(C)C)c(C)c1)c1ccc(C(=O)NC(C)C(=O)O)n1C  
 C=C1C(=CC=C2CCCC3(C)C2CCC3C(C)CC2OC(=O)C(=C)C2CCC)CC(O)C(C)C10  
 CC(O)CCCC(C)C1CCC2C(=CC=C3CC(O)C(C)C(O)C3)CCCC21C  
 C=C1C(=CC=C2CCCC3(C)C(C4(CCCC(C)(C)O)CC4)=CCC23)CC(O)CC10  
 C=C1C(=CC=C2CCCC3(C)C2CCC3C(C)CCCC(C)(C)O)CC(O)C2=CCOC12

CC(CCCCN(C)=O)C1CCCC2C(=CC=C3CC(O)CC(O)C3)CCCC21C  
 Cc1[nH]c2cccc2c1C(Nc1ccc(Cl)cc1)c1ncc[nH]1  
 C=C1C(=CC=C2CCCC3(C)C2CCC3C(C)CC2CC(C)(O)C(=O)N2CCc2cccc2)CC(O)CC10  
 Cc1ccc2c(C(Nc3ccc(OC(F)(F)F)cc3)c3cccc3Cl)c(C)[nH]c2c1  
 CCC(CC)(c1ccc(OC(O)C(C)(C)c(C)c1)c1ccc(C(=O)NCC(=O)O)n1C  
 C=C1C(=CC=C2CCCC3(C)C2CCC3C(C)CCC(O)C(C)C)CC(O)CC10  
 CC(=O)N1CCN(C(=O)Cn2c(-c3ccc(C)cc3)csc2=N)CC1  
 C=C1C(=CC=C2CCCC3(C)C2CCC3C(C)CC2OC(=O)C(=C)C2CC(C)C)CC(O)C(C)C10  
 C=C1C(O)CC(=CC=C2CCCC3(C)C2CCC3C(C)C(CC)CCC)CC10  
 CCC(CC)(c1ccc(OC(O)CO)c(C)c1)c1ccc(OC(O)C(C)(C)c(C)c1  
 Cc1[nH]c2cccc2c1C(Nc1cccc1)c1ccc(Cl)cc1  
 C=C1C(=CC=C2CCCC3(C)C2CCC3C(C)CC2OC(=O)C(=C)C2CCCC)CC(O)CC10  
 CCCS(=O)(=O)c1oc(-c2cccs2)nc1S(=O)(=O)c1ccc(F)cc1  
 C=C1C(=CC=C2CCCC3(C)C2CCC3C(C)CC2CC(C)(O)C(=O)N2CCc2cc(OC)cc(OC)c2)CC(O)CC10  
 CC(CCCCC(=O)Nc1cccc1N)C1CCC2C(=CC=C3CC(O)CC(O)C3)CCCC21C  
 CC(CCCCN(C)=O)CS)C1CCC2C(=CC=C3CC(O)CC(O)C3)CCCC21C  
 C=C1C(=CC=C2CCCC3(C)C2CCC3C(C)CC2OC(=O)C(=C)C2CCCC)CC(O)C(CCCO)C10  
 C=C1C(O)CC(=CC=CCC(C)=CC(C)CCC(C)(C)O)CC10  
 Cc1[nH]c2cccc2c1C(Nc1ccc([N+](=O)[O-])cc1)c1cccc1Cl  
 C=C1C(=CC=C2CCCC3(C)C2CCC3C(C)CC2OC(=O)C(=C)C2CC(C)C)CC(O)C(CCCO)C10  
 C=C1C(O)CC(=CC=C2CCCC3(C)C2CCC3C(C)C(CC)CC(C)(C)O)CC10  
 C=C1C(=CC=C2CCCC3(C)C(C(C)CCC(C)(C)O)CCC23C)CC(O)CC10  
 COc1ccc(C(Nc2ccc(C(F)(F)F)cc2)c2c(C)[nH]c3cccc23)cc1  
 Cc1ccc2c(C(Nc3cccnc3)c3cccc3Cl)c(C)[nH]c2c1  
 CS(=O)(=O)c1ccc(C(=O)NCCCC(=O)N2CCN(c3ccc(C(F)(F)F)cc3)CC2)cc1[N+](=O)[O-]  
 Cc1ccc(NC(c2cccc2Cl)c2c(C)[nH]c3cccc23)cc1C  
 C=C1C(=CC=C2CCCC3(C)C2CCC3C(C)CC2CC(C)(O)C(=O)N2CCc2cccc2)CC(O)CC10  
 C=C1C(=CC=C2CCCC3(C)C2CCC3C(C)CC2OC(=O)C(=C)C2CC(C)C)CC(O)C(OCCO)C10  
 Cc1[nH]c2cccc2c1C(Nc1ccc(Cl)cc1)c1cccnc1  
 C=C1C(=CC=C2CCCC3(C)C2CCC3C(C)CC2CC(C)(O)C(=O)N2Cc2cc(OC)cc(OC)c2)CC(O)CC10  
 Cc1ccc2c(C(Nc3ccc(C(F)(F)F)cc3)c3cccc3Cl)c(C)[nH]c2c1  
 COc1ccc(C(Nc2ccc(OC)c(OC)c2)c2c(C)[nH]c3cccc23)cc1  
 CCC(=CC=CC(O)(CC)CC)c1ccc(OCc2ccc(O)c(O)c2)c1  
 CC(CCCC(C)(C)O)C1CCC2C(=CC=C3CC(O)CC(O)C3=O)CCCC21C  
 C=C1C(=CC=C2CCCC3(C)C2CCC3C(C)(C)CC)CC(O)C(=CCO)C10  
 COc1ccc(NC(c2nccs2)c2c(C)[nH]c3cccc23)cc10C  
 C=C1C(=CC=C2CCCC3(C)C2CCC3C(C)CC(C)C)CC(O)C(=CCO)C10  
 COC(=O)c1ccc2c(c1)C(C)(C)C(C=Cc1ccc(O)cc1)=[N+]2C  
 COc1ccc(NC(c2cccc2Cl)c2c(C)[nH]c3cccc23)cc1  
 CC(C=CC(=O)NO)=CC(C)C1CCC2C(=CC=C3CC(O)CC(O)C3)CCCC21C  
 CCC(CC)(c1ccc(OC(O)CO)c(C)c1)c1ccc(OC(O)C(C)(C)CCCc2cccc2)c(C)c1  
 C=C1C(=CC=C2CCCC3(C)C2CCC3C(C)CC2CC(C)(O)C(=O)N2Cc2cccc2)CC(O)CC10  
 COC(=O)c1ccc2c(c1)C(C)(C)C(C=Cc1ccc(OC)cc1)=[N+]2C  
 CCC(CC)(c1ccc(OC(O)C(C)(C)c(C)c1)c1ccc(C(=O)NC(O)CO)n1C  
 CC(CCCCN(N)=O)C1CCC2C(=CC=C3CC(O)CC(O)C3)CCCC21C  
 COc1ccc(NC(c2ccc(C(F)(F)F)cc2)c2c(C)[nH]c3cccc23)cc10C  
 C=C1C(O)CC(=CC=C2CCCC3(C)C2CCC3C(C)C=CC(O)C23CC4CC(CC(C4)C2)C3)CC10  
 Cc1[nH]c2cccc2c1C(Nc1cccc1)c1ccc(C(C)C)cc1  
 CCCOC1C(O)CC(=CC=C2CCCC3(C)C(C(C)SCC(O)(CC)CC)=CCC23)CC10  
 C=C1C(=CC=C2CCCC3(C)C2CCC3C(C)CC2OC(=O)C(=C)C2CC)CC(O)C(CCCO)C10  
 C=C1C(=O)OC(CC(C)C)C2CCC3C(=CC=C4CC(O)C(CCCO)C(O)C4=C)CCCC32C)C1C  
 N=c1sc(-c2ccc(Cl)cc2)n1CC(=O)N1CCN(c2cccc2)CC1  
 C=C1C(O)CC(=CC=C2CCCC3(C)C2CCC3C(C)C(CCO)CCC)CC10  
 C=C1C(=CC=C2CCCC3(C)C2CCC3C(C)COCC(=C)C2(C)CCCC2)CC(O)CC10  
 CCC(CC)(c1ccc(OC(=O)C(C)(C)c(C)c1)c1ccc(C(=O)NCCC(=O)O)n1C  
 C=C1C(=CC=C2CCCC3(C)C2CCC3C(C)CCCC(C)(C)O)CC(O)C(CCN2cncn2)C10  
 C=C1C(=CC=C2CCCC3(C)C2CCC3C(C)CC2OC(=O)C(=C)C2CC)CC(O)C(OCCO)C10  
 CC(C=CC(=O)Nc1cccc1N)=CC(C)C1CCC2C(=CC=C3CC(O)CC(O)C3)CCCC21C  
 CC(=O)N1CCN(C(=O)Cn2c(-c3cccc3)csc2=N)CC1



C=C1C(=CC=C2CCCC3(C)C2CCC3C(C)CC20C(=O)C(=C)C2CCC)CC(0)C(0CCCC)C10  
C=C1C(=CC=C2CCCC3(C)C(C4(CCC(=O)C(C)(C)O)CC4)=CCC23)CC(0)CC10  
CC(CCCCCNS(N)(=O)=O)C1CCC2C(=CC=C3CC(O)CC(O)C3)CCCC21C  
C=C1C(=CC=C2CCCC3(C)C2CCC3C(C)C0CC(=C)C(C)(C)C)CC(0)CC10  
C=C1C(=CC=C2CCCC3(C)C2CCC3C(C)CC2CC(C)(O)C(=O)N2CCCc2cc(OC)cc(OC)c2)CC(0)CC10  
C=C1C(=CC=C2CCCC3(C)C2CCC3C(C)C=CC(O)C2(C=CC(=O)OCC)CC2)CC(0)CC10  
CCOc1ccc(C=CC2=[N+](C)c3ccc(C(=O)OC)cc3C2(C)C)cc1  
C=C1C(=CC=C2CCCC3(C)C2CCC3C(C)C0c2ccc(C(C)(C)O)cc2)CC(0)CC10  
Cc1[nH]c2ccccc2c1C(Nc1ccc(N(C)C)cc1)c1ccccc1C1

### S4.2.2 Testing set

The SMILES strings of the recreated VDR ligands are highlighted in yellow.

C=C1C(=CC=C2CCCC3(C)C2CCC3C(C)CCCC(C)(C)O)CC(0)C(CcN2ncnm2)C10  
CCC(0)(CC)CSC(C)C1=CC2C(=CC=C3CC(O)C(C)(O)C(O)C3)CCCC12C  
C=C1C(=CC=C2CCCC3(C)C2CCC3C(C)C(C)CCC(C)(C)O)CC(0)CC10  
C=C1C(O)CC(=CC=C2CCCC3C2CCC3C(C)CCCC(C)(C)O)CC10  
C=C1C(O)CC(=CC=C2CCCC3(C)C2CCC3C(C)C=CC(O)C23CC4CC(CC(C4)C2)C3)CC10  
C=C1C(O)CC(=CC=C2CCCC3(C)C2CCC3C(C)C(C)(C)CCC(C)(C)O)CC10  
CCC(0)(CC)CSC(C)C1=CC2C(=CC=C3CC(O)C(0CCO)C(O)C3)CCCC12C  
CCC(0)(CC)CSC(C)C1=CC2C(=CC=C3CC(O)C(=CCO)C(O)C3)CCCC12C  
C=C1C(O)CC(=CC=C2CCCC3(C)C2CCC3C(C)CCC(O)(CC)CC)CC10  
C=C1C(=CC=C2CCCC3(C)C2CCC3C(C)C(C)CCC(C)(C)O)CC(0)CC10  
CCC(CC)(c1ccc(OC(O)CO)c(C)c1)c1ccc(OC(O)C(C)(C)C)c(C)c1  
C=C1C(=CC=C2CCCC3(C)C2CCC3C(C)CCCC(C)(C)O)CC(0)C(CcN2ncn2)C10  
C=C1C(O)CC(=CC=C2CCCC3C(C)CCCC(C)(C)O)CCC23)CC10  
CCC(CC)(c1ccc(OC(O)C(C)(C)C)c(C)c1)c1ccc(OC(O)CO)c(C)c1  
CC(CCCC(C)(C)O)C1CCC2C(=CC=C3CC(O)C(=CCF)C(O)C3)CCCC21C  
C=C1C(O)CC(=CC=C2CCCC3(C)C2CCC3C(C)CC#CC(O)C23CC4CC(CC(C4)C2)C3)CC10  
C=C1C(=CC=C2CCCC3(C)C2CCC3C(C)CSc2ccc(C(C)(C)O)cc2)CC(0)CC10  
CCOC1C(O)CC(=CC=C2CCCC3(C)C(C(C)SCCCC(O)(CC)CC)=CCC23)CC10  
C=C1C(O)CC(=CC=C2CCCC3(C)C2CCC3C(C)CCCC(C)(C)O)CC10  
C=C1C(O)CC(=CC=C2CCCC3(C)C2CCC3C(C)OCC(C)C(C)(C)O)CC10  
C=C1C(O)CC(=CC=C2CCCC3(C)C2CCC3C(C)C(CCCC)CC(C)(C)O)CC10  
C=C1C(=CC=C2CCCC3(C)C2CCC3C(C)C(CCCC)CCC(C)(C)O)CC(0)CC10  
C=C1C(O)CC(=CC=C2CCCC3(C)C(CCCC(C)(C)O)CCC23)CC10  
C=C1CCC(O)CC1=CC=C1CCC2(C)C1CCC2C(C)CCCC(C)C  
C=C1C(=CC=C2CCCC3(C)C2CCC3C(C)CCCC(C)(C)O)CC(0)C(CcN2cncm2)C10  
C=C1C(=CC=C2CCCC3(C)C2CCC3C(C)CC)CC(O)C(=CCO)C10  
C=C1C(=CC=C2CCCC3(C)C2CCC3C(C)C=CC(O)C2CC2)CC(0)CC10  
C=C1C(O)CC(=CC=C2CCCC3(C)C2CCC3C(C)C(C)CC(O)(CC)CC)CC10  
C=C1C(=CC=C2CCCC3(C)C2CCC3C(C)C=CC(O)C2(C(=O)OCCCC)CC2)CC(0)CC10  
C=C1C(O)CC(=CC=C2CCCC3(C)C2CCC3C(C)C(CCCC)CC(O)(CC)CC)CC10  
CCc1cc(C(O)(CC)CC)ccc1-c1cc(Cc2ccc(CO)c(CO)c2)ccc1C  
C=C1C(=CC=C2CCCC3(C)C2CCC3C(C)CCCC(C)(C)O)CC(0)C(CcN2cnc2)C10  
C=C1CC(CC(C)C2CCC3C(=CC=C4CC(O)C(=C)C(O)C4)CCCC32C)OC1=O  
C=C1C(O)CC(=CC=C2CCCC3(C)C2CCC3C(C)CC#CC(O)CC23CC4CC(CC(C4)C2)C3)CC10  
**C=C1C(O)CC(=CC=C2CCCC3(C)C2CCC3C(C)C(CCCC)CC(O)CC10**  
C=C1C(=CC=C2CCCC3(C)C2CCC3C(C)C(CCO)CCCC)CC(0)CC10  
CCC(=CC=CC(O)(C(F)(F)F)C(F)(F)F)c1cccc(Cc2ccc(CO)c(CO)c2)c1  
C=C1C(O)CC(=CC=CCC(C)(C)CC(C)CCCC(C)(C)O)CC10  
CCCc1cc(C(O)(CC)CC)ccc1-c1cc(OCc2ccc(CO)c(CO)c2)ccc1CC  
C=C1C(O)CC(=CC=C2CCCC3(C)C2CCC3C(C)C(C)CCC(C)(C)O)CC10  
C=C1C(O)CC(=CC=CCC(C)CC(C)CCCC(C)(C)O)CC10  
C=C1C(O)CC(=CC=C2CCCC3(C)C2CCC3C(C)C=CCC(O)CC23CC4CC(CC(C4)C2)C3)CC10  
CcN1c(C(=O)NC(C)C(=O)O)ccc1C(CC)(CC)c1ccc(OC(O)C(C)(C)C)c(C)c1  
CCC(=CC=CC(O)(C(F)(F)F)C(F)(F)F)c1cccc(OCc2ccc(CO)c(CO)c2)c1

C=C1C(=CC=C2CCCC(C)C)C3(C)C2CCC3C(C)CCO)CC(0)CC10  
 C=C1C(=CC=C2CCCC3(C)C2CCC3C(C)CC20C(=0)C(=C)C2(C)C)CC(0)CC10  
 C=C1C(=CC=C2CCCC3(C)C2CCC3C(C)CC20C(=0)C(=C)C2CCC)CC(0)CC10  
 C=C1C(=CC=C2CCCC3(C)C2CCC3C(C)CC20C(=0)C(=C)C2CCC3)CC(0)CC10  
 C=C1C(=CC=C2CCCC3(C)C2CCC3C(C)CC20C(=0)C(=C)C2CCC)CC(0)C(CCCO)C10  
 C=C1C(=CC=C2CCCC3(C)C2CCC3C(C)CC20C(=0)C(=C)C2CCC)CC(0)C(C)C10  
 C=C1C(=CC=C2CCCC3(C)C2CCC3C(C)CC20C(=0)C(=C)C2CC)CC(0)C(C)C10  
 C=C1C(=0)OC(C)C)C2CCC3C(=CC=C4CC(O)C(C)C(O)C4=C)CCCC32C)C1C  
 C=C1C(=CC=C2CCCC3(C)C2CCC3C(C)CC20C(=0)C(=C)C2C)CC(0)CC10  
 C=C1C(=CC=C2CCCC(C)C)C3(C)C2CCC3C(C)CO)CC(0)CC10  
 C=C1C(=CC=C2CCCC3(C)C2CCC3C(C)CC20C(=0)C(=C)C2CC)CC(0)CC10  
 C=C1C(=CC=C2CCCC3(C)C2CCC3C(C)CC20C(=0)C(=C)C2CCC)CC(0)C(OCCC)C10  
 C=C1C(=CC=C2CCC(C)C)C3(C)C2CCC3C(C)CO)CC(0)CC10  
 C=C1C(=CC=C2CCCC3(C)C2CCC3C(C)CC2CC(C)C(O)C(=O)N2C)CC(0)CC10  
 C=C1C(=CC=C2CCCC3(C)C2CCC3C(C)CCC(C)C)CC(0)CC10  
 CC(OCCC(C)C)C1OCC2C(=CC=C3CC(O)C(=CCO)C(O)C3)CCCC21C  
 CC(CCCNS(=O)(=O)C(F)F)C1CCC2C(=CC=C3CC(O)CC(O)C3)CCCC21C  
 C=C1C(=CC=C2CCCC3(C)C2CCC3C(C)OCCC(O)CC)CC(0)CC1C(F)F  
 CCC(CC)(c1ccc(OCC(=O)C(C)C)c(C)c1)c1ccc(C(=O)NCC(=O)OC)n1C  
 CCCS(=O)(=O)NCCCC(C)C1CCC2C(=CC=C3CC(O)CC(O)C3)CCCC21C  
 CC(OCCC(C)C)C1OCC2C(=CC=C3CC(O)C4=CCOC4C3)CCCC21C  
 C=C1C(=CC=C2CCCC3(C)C2CCC3C(C)CCC(C)C)O)CC(0)CC1C(F)F  
 CCC(CC)(c1ccc(OCC(=O)C(C)C)c(C)c1)c1ccc(OCC(=O)C(C)C)c(C)c1  
 C=C1C(=CC=C2CCCC3(C)C2CCC3C(C)COCC#CC(C)C)CC(0)CC10  
 CC(C=CC(O)C1CC3CC(CC(C3)C1)C2)C1CCC2C(=CC=C3CC(O)CC(O)C3)CCCC21C  
 C=C1C(=CC=C2CCCC3(C)C(C)C)CCC(F)F)C(O)CC)CC(=CC23)CC(0)CC1C(F)F  
 C=C1C(O)CC(=CC=C3CC(C)CCC(C)C)O)CC10  
 C=C1C(=CC=C2CCCC3(C)C2CCC3C(C)COc2cccc2)CC(0)CC10  
 C=C1C(=CC=C2CCCC3(C)C2CCC3C(C)CC2CC(C)O)C(=O)N2Cc2cc(OCC)cc(OCC)c2)CC(0)CC10  
 CCC(CC)(c1ccc(OCC(=O)C(C)C)c(C)c1)c1ccc(OCC(O)CO)c(C)c1  
 CCn1c(C(=O)NC(O)CC)ccc1C(CC)(CC)c1ccc(OCC(O)C(C)C)c(C)c1  
 C=C1C(=CC=C2CCCC3(C)C2CCC3C(C)CC2CC(C)O)C(=O)N2Cc2cc(OCCC)cc(OCCC)c2)CC(0)CC10  
 CC(OCCNS(=O)(=O)C1CCC2C(=CC=C3CC(O)CC(O)C3)CCCC21C  
 CC(OCCC(=O)O)C1CCC2C(=CC=C3CC(O)CC(O)C3)CCCC21C  
 C=C(COCC(C)C1CCC2C(=CC=C3CC(O)CC(O)C3=C)CCCC21C)C1=CCCC1(C)C  
 CC(OCCNS(C)C(=O)=O)C1CCC2C(=CC=C3CC(O)CC(O)C3)CCCC21C  
 CC(OCC(=O)O)C1CCC2C3CCC4CC(O)CCC4(C)C3CCC12C  
 C=C1C(=CC=C2CCCC3(C)C2CCC3C(C)CC2CC(C)O)C(=O)N2CCCCc2cccc2)CC(0)CC10  
 CCC(CC)(c1ccc(OCC(=O)C(C)C)c(C)c1)c1ccc(C(=O)NC(CC(=O)O)C(=O)O)n1C  
 C=C1C(=CC=C2CCCC3(C)C2CCC3C(C)CC2CC(C)O)C(=O)N2Cc2cc(OCCC)cc(OCCC)c2)CC(0)CC10  
 CCC(CC)(c1ccc(OCC(O)C(C)C)c(C)c1)c1ccc(C(=O)NC(C)CO)n1C  
 C=C1C(=CC=C2CCCC3(C)C2CCC3C(C)CC2CC(C)O)C(=O)N2Cc2ccc(O)cc2)CC(0)CC10  
 Cc1ccc(-c2csc(=N)n2CC(=O)N2CCN(c3cccc3)CC2)cc1  
 CCC(CC)(c1ccc(OCC(O)C(C)C)c(C)c1)c1ccc(C(=O)NCCC(=O)O)n1C  
**N=c1sc(-c2cccc2)n1CC(=O)N1CCN(c2cccc2)CC1**  
 CCn1c(C(=O)NCC(=O)OC)ccc1C(CC)(CC)c1ccc(OCC(=O)C(C)C)c(C)c1  
 Nc1nc2ccc(S(=O)(=O)N3CCCC3)cc2s1  
 CC(C)CC(N)C(=O)NC(CC(C)C)C(=O)NC1CCOC(O)C(O)COCCC(C(=O)O)NC(=O)C(CC(C)C)NC(=O)C(C)C(C)NC(=O)C(C)C(C)NC1=O  
 Cc1ccc(CNC(c2cccc2Cl)c2c(C)[nH]c3cc(C)ccc23)cc1  
 CN1CCN(C(=O)Cn2c(-c3ccc(Cl)cc3)csc2=N)CC1  
 Cc1[nH]c2cccc2c1C(Nc1ccc(Cl)cc1)c1ccncc1  
 Cc1[nH]c2cccc2c1C(Nc1ccc(Cl)cc1)c1ncs1  
 COc1ccc(C=CC2=[N+](C)c3ccc(O)cc3C2(C)C)cc1  
 Cc1[nH]c2cccc2c1C(Nc1ccc(Cl)cc1)c1cccc1C1  
 Cc1ccc2c(C(Nc3ccc(Cl)cc3)c3cccc3Cl)c(C)[nH]c2c1  
 Cc1[nH]c2cccc2c1C(NCc1cccc1)c1cccc1C1  
 COc1ncccc1NC(c1ccnc1)c1c(C)[nH]c2cc(C)ccc12  
 CCn1c(C(=O)NCCO)ccc1C(CC)(CC)c1ccc(OCC(O)C(C)C)c(C)c1

CCC(CC) (c1ccc(OCC(O)CO)c(C)c1)c1ccc(OCC(O)C(C)(C)CCc2ccccc2)c(C)c1  
 COc1ccc2c(C(Nc3ccc(Cl)cc3)c3ccccc3Cl)c(C)[nH]c2c1  
 COC(=O)c1ccc(C=CC2=[N+](C)c3ccc(OC)cc3C2(C)C)cc1  
**Cc1[nH]c2ccccc2c1C(Nc1ccccc1)c1ccccc1Cl**  
 COc1ccccc1NC(c1ccccc1Cl)c1c(C)[nH]c2ccccc12  
 Cc1ccc2c(C(NC3ccc(C(F)(F)F)cc3)c3ccccc3Cl)c(C)[nH]c2c1  
 COc1ccc(NC(c2ccccc2Cl)c2c(C)[nH]c3cc(C)ccc23)cc1OC  
 COc1ccc(C(Nc2ccccc2)c2c(C)[nH]c3ccccc23)cc1

### S4.2.3 Seeds

C=C1C(=CC=C2CCCC3(C)C(C4(CCC(=O)C(C)(C)O)CC4)=CCC23)CC(O)CC1O  
 C=C1C(=CC=C2CCCC3(C)C2CCC3C(C)CC2OC(=O)C(=C)C2CC)CC(O)C(CCCO)C1O  
 CC(C)S(=O)(=O)c1oc(-c2cccs2)nc1S(=O)(=O)c1ccccc1  
 C=C1C(=CC=C2CCCC3(C)C2CCC3C(C)CC2CC(C)(O)C(=O)N2CCc2ccccc2)CC(O)CC1O  
 C=C1C(O)CC(=CC=C2CCCC3(C)C2CCC3C(C)C=CCC(O)C23CC4CC(CC(C4)C2)C3)CC1O  
 CC(=O)N1CCN(C(=O)Cn2c(-c3ccc(Cl)cc3)csc2=N)CC1  
 COc1ccc(NC(c2ccccc2Cl)c2c(C)[nH]c3ccccc23)cc1  
 C=C1C(=CC=C2CCCC3(C)C2CCC3C(C)CC2OC(=O)C(=C)C2CCC)CC(O)C(C)C1O  
 CC(CCCCNS(N)(=O)=O)C1CCC2C(=CC=C3CC(O)CC(O)C3)CCCC21C  
 CCC(CC)(c1ccc(OCC(O)CO)c(C)c1)c1ccc(OCC(O)C(C)(C)CCc2ccccc2)c(C)c1  
 C=C1C(=CC=C2CCCC3(C)C2CCC3C(C)C(CCCC)CC(O)C(C)C)CC(O)CC1O  
 Cc1[nH]c2ccccc2c1C(Nc1ccc(Cl)cc1)c1ccccc1  
 C=C1C(O)CC(=CC=C2CCCC3(C)C2CCC3C(C)CCCC(C)O)CC1O  
 C=C1C(=CC=C2CCCC3(C)C2CCC3C(C)CC2CC(C)(O)C(=O)N2CCc2cc(OC)cc(OC)c2)CC(O)CC1O  
 COc1ccc(NC(c2ccc(C(F)(F)F)cc2)c2c(C)[nH]c3ccccc23)cc1OC  
 CC(CCCCC(=O)Nc1ccccc1N)C1CCC2C(=CC=C3CC(O)CC(O)C3)CCCC21C  
 COC(=O)c1ccc2c(c1)C(C)(C)C(C=Cc1ccc(OC)cc1)=[N+]2C  
 CCC(=CC=CC(O)(CC)CC)c1ccccc(OCc2ccc(CO)c(CO)c2)c1  
 CC(=O)N1CCN(C(=O)Cn2c(-c3ccccc3)csc2=N)CC1  
 Cc1ccc(NC(c2ccccc2Cl)c2c(C)[nH]c3ccccc23)cc1  
 Cc1[nH]c2ccccc2c1C(Nc1ccccc1)c1ccc(Cl)cc1  
 C=C1C(O)CC(=CC=C2CCCC3(C)C2CCC3C(C)C(C)C(C)C)CC(O)CC1O  
 C=C1C(=CC=C2CCCC3(C)C2CCC3C(C)CC2OC(=O)C(=C)C2CCC)CC(O)C(OCCCC)C1O  
 C=C1C(=CC=C2CCCC3(C)C2CCC3C(C)CCCC(C)(C)O)CC2OCC=C2C1O  
 CC(CCCC(=O)Nc1ccccc1N)C1CCC2C(=CC=C3CC(O)CC(O)C3)CCCC21C  
 CC(=O)N1CCN(C(=O)Cn2c(-c3ccc(C)cc3)csc2=N)CC1  
 CCC(CC)(c1ccc(OCC(=O)C(C)(C)C)c(C)c1)c1ccc(C(=O)NCCC(=O)OC)n1C  
 COc1ccc(C(Nc2ccc(OC)c(OC)c2)c2c(C)[nH]c3ccccc23)cc1  
 N=c1sc(-c2ccc(Cl)cc2)n1CC(=O)N1CCN(c2ccccc2)CC1  
 CC(CCCC(C)(C)O)C1CCC2C(=CC=C3CC(O)CC(O)C3=O)CCCC21C

## S4.3 Sample 3

### S4.3.1 Training set

C=C1C(=CC=C2CCCC3(C)C2CCC3C(C)CCCC(C)(C)O)CC(O)C(Cc2ccccc2)C1O  
 CCC(=CC=CC(O)(C(F)(F)F)C(F)(F)F)c1ccccc(OCc2ccc(CO)c(CO)c2)c1  
 CCC(CC)(c1ccc(OCC(O)C(C)(C)C)c(C)c1)c1ccc(C(=O)NCC(=O)O)n1C  
 C=C1C(O)CC(=CC=C2CCCC3(C)C2CCC3C(C)C(C)C)CC(O)CC1O  
 CCC(=CC=CC(O)(C(F)(F)F)C(F)(F)F)c1ccccc(OCc2ccc(CO)c(CO)c2)c1  
 COc1ccc(NC(c2ccccc2)c2c(C)[nH]c3ccccc23)cc1OC  
 Nc1nc2ccc(S(=O)(=O)N3CCCC3)cc2s1  
 CC(C)CS(=O)(=O)c1oc(-c2cccs2)nc1S(=O)(=O)c1ccc(F)cc1  
 C=C1C(=CC=C2CCCC3(C)C2CCC3C(C)CC2OC(=O)C(=C)C2CC(C)C)CC(O)C(OCCCC)C1O  
 C=C1C(O)CC(=CC=C2CCCC3(C)C2CCC3C(C)C(C)C)CC(O)CC1O  
 C=C1C(=CC=C2CCCC3(C)C2CCC3C(C)CC2OC(=O)C(=C)C2CC)CC(O)C(CCCO)C1O

C=C1C(O)CC(=CC=C2CCCC3(C)C2CCC3C(C)C(C)C)CC1O  
 C=C1C(O)CC(=CC=C2CCCC3(C)C(C)C)CC1O  
 C=C1C(O)CC(=CC=C2CCCC3(C)C2CCC3C(C)C(C)C)CC1O  
 C=C1C(=CC=C2CCC(C)C)C3(C)C2CCC3C(C)C)CC1O  
 N=C1scc(-c2ccc(Cl)cc2)n1CC(=O)N1CCOCC1  
 C=C1C(=CC=C2CCCC3(C)C2CCC3C(C)C(C)C)CC1O  
 CC(C)C(C)C(=O)C1CCC2C(=CC=C3CC(O)C(C)C)CCCC21C  
 C=C1C(=CC=C2CCCC3(C)C2CCC3C(C)C(C)C)CC1O  
 CCC(O)C(C)C(C)C1=CC=C2C(=CC=C3CC(O)C(C)C)C3)CCCC12C  
 C=C1C(=CC=C2CCCC3(C)C2CCC3C(C)C2CC(C)C)C(=O)N2CCc2cccc2)CC(O)CC1O  
 CN1CCN(C(=O)Cn2c(-c3ccc(Cl)cc3)csc2=N)CC1  
 C=C1C(=O)OC(C)C2CCC3(=CC=C4CC(O)C(C)C)C4=C)CCCC32C)C1C  
 CC(C)C(C)C(N)C(=O)C1CCC2C(=CC=C3CC(O)C(C)C)CCCC21C  
 Cc1[nH]c2cccc2c1C(Nc1cccc1)c1cccc1C1  
 Cc1[nH]c2cccc2c1C(Nc1ccc(Cl)cc1)c1ncs1  
 COc1ccc(C(Nc2ccc(C(F)F)cc2)c2c(C)[nH]c3cccc23)cc1  
 CCC(C)C(c1ccc(OCC(O)C)cc1)c1ccc(OCC(O)C(C)C)c1  
 COc1ccc(NC(c2cccc2Cl)c2c(C)[nH]c3cc(C)ccc23)cc1OC  
 COCCOCC=C1C(O)CC(=CC=C2CCCC3(C)C2CCC3C(C)C(C)C)CC1O  
 C=C1C(=CC=C2CCCC3(C)C2CCC3C(C)CC2OC(=O)C(=C)C2CCC)CC(O)CC1O  
 COc1ccc(C=CC2=[N+](C)c3ccc(OC)cc3C2(C)C)cc1  
 C=C1C(O)CC(=CC=C2CCCC3(C)C2CCC3C(C)C#C(O)C23CC4CC(C)C4)C2)C3)CC1O  
 C=C1C(=CC=C2CCCC3(C)C2CCC3C(C)CC2OC(=O)C(=C)C2CC(C)C)CC(O)CC1O  
 C=C1C(=CC=C2CCCC3(C)C2CCC3C(C)C=CC(O)C2CC2)CC(O)CC1O  
 C=C1C(O)CC(=CC=C2CCCC3(C)C2CCC3C(C)C(C)C)CC(C)C)CC1O  
 C=C1C(=CC=C2CCCC3(C)C2CCC3C(C)C(C)C)CC(O)C(Cn2cncn2)C1O  
 C=C1C(=CC=C2CCCC3(C)C2CCC3C(C)CC2CC(C)C)C(=O)N2Cc2cc(O)CC(C)C)CC(O)CC1O  
 CC(C)C(C)C(=O)C1CCC2C(=CC=C3CC(O)C(C)C)CCCC21C  
 C=C1C(=CC=C2CCCC3(C)C2CCC3C(C)CC2OC(=O)C(=C)C2CCCC)CC(O)C(C)C1O  
 CCC(C)C(c1ccc(OCC(=O)C(C)C)c1)c1ccc(C(=O)NCCC(=O)OC)n1C  
 N=C1scc(-c2cccc2)n1CC(=O)N1CCN(c2cccc2)CC1  
 CC(C=CC(=O)Nc1cccc1N)=CC(C)C1CCC2C(=CC=C3CC(O)C(C)C)CCCC21C  
 C=C1C(=CC=C2CCCC3(C)C2CCC3C(C)C(C)C)CC(O)C(Cn2nccn2)C1O  
 CCC(=CC=CC(O)C)C1cccc(OCc2ccc(C)C)C2)c1  
 Cc1ccc2c(C(Nc3cccnc3)c3cccc3Cl)c(C)[nH]c2c1  
 COc1ccc(NC(c2ccc(OC(F)F)cc2)c2c(C)[nH]c3cccc23)cc1OC  
 CCn1c(C(=O)NC(C)CO)ccc1C(C)C)c1ccc(OCC(O)C(C)C)c1  
 C=C1C(=CC=C2CCCC3(C)C2CCC3C(C)C(C)C)CC(O)C2=CCOC12  
 CCC(C)C(c1ccc(OCC(O)C(C)C)c1)c1ccc(C(=O)NCCC)O)n1C  
 C=C1C(=CC=C2CCCC3(C)C2CCC3C(C)CC2OC(=O)C(=C)C2CC(C)C)CC(O)C(C)C1O  
 C=C1C(=O)OC(C)C2CCC3(=CC=C4CC(O)C(C)C)C4=C)CCCC32C)C1C  
 C=C1C(O)CC(=CC=C2CCCC3(C)C2CCC3C(C)C(C)C)CC(C)C)CC1O  
 C=C1C(=CC=C2CCCC3(C)C2CCC3C(C)CC2OC(=O)C(=C)C2CC)CC(O)C(C)C1O  
 C=C1C(=CC=C2CCCC3(C)C2CCC3C(C)CC2CC(C)C)C(=O)N2Cc2cc(O)CC(C)C)CC(O)CC1O  
 C=C1C(=CC=C2CCCC3(C)C2CCC3C(C)C(C)C)CC(O)CC1O  
 CCn1c(C(=O)NC(C)CO)ccc1C(C)C)c1ccc(OCC(O)C(C)C)c1  
 C=C1C(O)CC(=CC=CCC(C)C)CC(C)CCCC(C)C)CC1O  
 C=C1C(=CC=C2CCCC3(C)C2CCC3C(C)C(C)C)CC(O)C(C)C)CC(O)CC1O  
 COc1ccc2c(C(Nc3ccc(Cl)cc3)c3cccc3Cl)c(C)[nH]c2c1  
 C=C1C(=CC=C2CCCC3(C)C2CCC3C(C)CC2OC(=O)C(=C)C2CCC)CC(O)C(C)C1O  
 CC(C)C(C)C(=O)N1C1CCC2C(=CC=C3CC(O)C(C)C)CCCC21C  
 CC(C)C(C)C(N)C(=O)C1CCC2C(=CC=C3CC(O)C(C)C)CCCC21C  
 Cc1ccc(NC(c2cccc2Cl)c2c(C)[nH]c3cccc23)cc1  
 C=C1C(=CC=C2CCCC3(C)C2CCC3C(C)C(C)C)CC(O)CC1O  
 CCCOC1C(O)CC(=CC=C2CCCC3(C)C(C)C)SCC(O)C)CC)C)CC23)CC1O  
 C=C1C(=CC=C2CCCC3(C)C2CCC3C(C)CC2CC(C)C)C(=O)N2CCc2cccc2)CC(O)CC1O  
 C=C1C(=CC=C2CCCC3(C)C2CCC3C(C)C(C)C)CC(O)CC1O

```

CCCS(=O)(=O)c1oc(-c2cccs2)nc1S(=O)(=O)c1ccc(F)cc1
C=C1C(=CC=C2CCCC3(C)C2CCC3C(C)CC2OC(=O)C(=C)C2CCCC)CC(O)C(CCCO)C1O
Cc1ccc(NC(c2ccccc2Cl)c2c(C)[nH]c3ccccc23)cc1C
CC(=O)N1CCN(C(=O)Cn2c(-c3ccc(Cl)cc3)csc2=N)CC1
Cc1ccc2c(C(Nc3ccc(C(F)F)cc3)c3ccccc3Cl)c(C)[nH]c2c1
C=C1C(O)CC(=CC=C2CCCC3(C)C2CCC3C(C)C(C)CC(O)(CC)CC)CC1O
CCOc1ccc(C=CC2=[N+](C)c3ccc(C(=O)OC)cc3C2(C)C)cc1
C=C1C(=CC=C2CCCC3(C)C2CCC3C(C)CCCC(C)(C)O)CC(O)CC1C(F)F
C=C1C(=CC=C2CCCC3(C)C2CCC3C(C)CC2OC(=O)C(=C)C2CC)CC(O)C(OC(=O)C)C1O
C=C1C(O)CC(=CC=C2CCCC3(C)C2CCC3C(C)C=CC(O)C23CC4CC(C(C4)C2)C3)CC1O
CCn1c(C(=O)NCC(=O)OC)ccc1C(CC)(CC)c1ccc(OC(=O)C(C)(C)C)c(C)c1
CC(CCCC(C)(C)O)C1CCC2C(=CC=C3CC(O)C(=CCF)C(O)C3)CCCC21C
C=C1C(=CC=C2CCCC3(C)C(C4(CCC(=O)C(C)(C)O)CC4)=CCC23)CC(O)CC1O
CC(CCCC(C)(C)O)C1CCC2C(=CC=C3CC(O)C(=CCO)C(O)C3)CCCC21C
Cc1[nH]c2ccccc2c1C(Nc1ccc(Cl)cc1)c1ncc[nH]1
CCC(O)(CC)CSC(C)C1=CC2C(=CC=C3CC(O)C(=CCO)C(O)C3)CCCC12C
C=C1C(=CC=C2CCCC3(C)C2CCC3C(C)COC(=C)C(C)(C)CC(O)CC1O
CC(CCC(=O)O)C1CCC2C3CCC4CC(O)CCC4(C)C3CCC12C
C=C1C(=CC=C2CCCC3(C)C2CCC3C(C)CC2CC(C)(O)C(=O)N2Cc2ccccc2)CC(O)CC1O
C=C1C(O)CC(=CC=C2CCCC3(C)CCCC(C)(C)O)CCC23)CC1O
CC(CCCNS(C)(=O)O)C1CCC2C(=CC=C3CC(O)CC(O)C3)CCCC21C
COC(=O)c1ccc2c(c1)C(C)(C)C(C=Cc1ccc(O)cc1)=[N+](C)2C
C=C1C(=CC=C2CCC(C)CCCC(C)(C)O)C3(C)C2CCC3C(C)CCO)CC(O)CC1O
C=C1C(=CC=C2CCCC3(C)C2CCC3C(C)COCc2ccccc2)CC(O)CC1O
C=C1C(O)CC(=CC=CCC(C)CC(C)CCCC(C)(C)O)CC1O
C=C1C(O)CC(=CC=C2CCCC3(C)C2CCC3C(C)CCCC(C)(C)O)CC1O
CC(CCCC(=O)Nc1ccccc1N)C1CCC2C(=CC=C3CC(O)CC(O)C3)CCCC21C
CC(CCCNS(N)(=O)O)C1CCC2C(=CC=C3CC(O)CC(O)C3)CCCC21C
CCC(CC)(c1ccc(OC(O)C(C)(C)C)c(C)c1)c1ccc(C(=O)NC(CO)CCO)n1C
C=C1C(=CC=C2CCCC3(C)C2CCC3C(C)CSc2ccc(C(C)(C)O)cc2)CC(O)CC1O

```

### S4.3.2 Testing set

The SMILES strings of the recreated VDR ligands are highlighted in yellow.

```

C=C1C(O)CC(=CC=C2CCCC3(C)C2CCC3C(C)CCCC(C)O)CC1O
C=C1C(=CC=C2CCCC3(C)C2CCC3C(C)CCCC(C)(C)O)CC(O)C(Cc1n2cnm2)C1O
CCC(O)(CC)CSC(C)C1=CC2C(=CC=C3CC(O)C(C)(O)C(O)C3)CCCC12C
C=C1C(=CC=C2CCCC3(C)C2CCC3C(C)C(C)CCC(C)(C)O)CC(O)CC1O
C=C1C(O)CC(=CC=C2CCCC3C2CCC3C(C)CCCC(C)(C)O)CC1O
CC(O)CCCC(C)C1CCC2C(=CC=C3CC(O)C(C)C(O)C3)CCCC21C
C=C1C(O)CC(=CC=C2CCCC3(C)C2CCC3C(C)CCC(O)(CC)CC)CC1O
C=C1C(=CC=C2CCCC3(C)C2CCC3C(C)C(C)CCC(C)(C)O)CC(O)CC1O
CCC(CC)(c1ccc(OC(O)C(C)(C)C)c(C)c1)c1ccc(OC(CO)CO)c(C)c1
C=C1C(=CC=C2CCCC3(C)C2CCC3C(C)COCc2ccc(C(C)(C)O)cc2)CC(O)CC1O
CCOC1C(O)CC(=CC=C2CCCC3(C)C(C)SCCC(O)(CC)CC)=CCC23)CC1O
C=C1C(O)CC(=CC=C2CCCC3(C)C2CCC3C(C)C(CCCC)CC(C)(C)O)CC1O
C=C1C(=CC=C2CCCC3(C)C(C)C)CCCC(C)(C)O)CCC23)CC(O)CC1O
C=C1CCC(O)CC1=CC=C1CCC2(C)C1CCC2C(C)CCCC(C)C
C=C1C(O)CC(=CC=C2CCCC3(C)C2CCC3C(C)C(CCO)CCCC)CC1O
C=C1C(=CC=C2CCCC3(C)C2CCC3C(C)(C)CC)CC(O)C(=CCO)C1O
C=C1C(=CC=C2CCCC3(C)C2CCC3C(C)CC)CC(O)C(=CCO)C1O
C=C1C(=CC=C2CCCC3(C)C2CCC3C(C)C=CC(O)C2(C=CC(=O)OC)CC2)CC(O)CC1O
C=C1C(=CC=C2CCCC3(C)C2CCC3C(C)C=CC(O)C2(C(=O)OCCC)CC2)CC(O)CC1O
C=C1C(O)CC(=CC=C2CCCC3(C)C2CCC3C(C)C(CCCC)CC(O)(CC)CC)CC1O
CCCc1cc(C(O)(CC)CC)ccc1-c1cc(CCc2ccc(CO)c(CO)c2)ccc1C
CC(CCCC(C)(C)O)C1CCC2C(=CC=C3CC(O)CC(O)C3=O)CCCC21C

```

C=C1C(=CC=C2CCCC3(C)C(C4(CCCC(C)(C)O)CC4)=CCC23)CC(O)CC1O  
C=C1C(=CC=C2CCCC3(C)C2CCC3C(C)CCCC(C)(C)O)CC(O)C(Cc1ncnc2)C1O  
C=C1CC(CC(C)C)C2CCC3C(=CC=C4CC(O)C(=C)C(O)C4)CCCC32C)OC1=O  
C=C1C(O)CC(=CC=C2CCCC3(C)C2CCC3C(C)CC#CC(O)CC23CC4CC(CC(C4)C2)C3)CC1O  
**C=C1C(O)CC(=CC=C2CCCC3(C)C2CCC3C(C)C(CCCC)CCO)CC1O**  
CCC(CC)(c1ccc(OCC(O)C(C)(C)C)c(C)c1)c1ccc(OCC(O)C(O)C)C(C)c1  
C=C1C(O)CC(=CC=C2CCCC3(C)C2CCC3C(C)C=CCC(O)C23CC4CC(CC(C4)C2)C3)CC1O  
CCC(CC)(c1ccc(OCC(O)C)C)c(C)c1)c1ccc(OCC(O)C(C)(C)C)c(C)c1  
C=C1C(O)CC(=CC=C2CCCC3(C)C2CCC3C(C)C(CC)CC(C)(C)O)CC1O  
CCc1cc(C(O)(CC)CC)ccc1-c1cc(OCC2ccc(O)c(O)c2)ccc1CC  
C=C1C(O)CC(=CC=C2CCCC3(C)C2CCC3C(C)C=CCC(O)CC23CC4CC(CC(C4)C2)C3)CC1O  
CCn1c(C(=O)NC(C)C(=O)O)ccc1C(CC)(CC)c1ccc(OCC(O)C(C)(C)C)c(C)c1  
C=C1C(=CC=C2CCC(C)CCCC(C)(C)O)C3(C)C2CCC3C(C)CCO)CC(O)CC1O  
C=C1CC(CC(C)C)C2CCC3C(=CC=C4CC(O)CC(O)C4=C)CCCC32C)OC1=O  
C=C1C(=CC=C2CCCC3(C)C2CCC3C(C)CC2OC(=O)C(=C)C2(C)C)CC(O)CC1O  
C=C1C(=CC=C2CCCC3(C)C2CCC3C(C)CC2OC(=O)C(=C)C23CCCC3)CC(O)CC1O  
C=C1C(=CC=C2CCCC3(C)C2CCC3C(C)CC2OC(=O)C(=C)C2CCC)CC(O)C(C)C1O  
C=C1C(=CC=C2CCCC3(C)C2CCC3C(C)CC2OC(=O)C(=C)C2CCC)CC(O)C(OCCC)C1O  
C=C1C(=O)OC(CC(C)C)C2CCC3C(=CC=C4CC(O)C(C)C(O)C4=C)CCCC32C)C1C  
C=C1C(=CC=C2CCCC3(C)C2CCC3C(C)CCC(O)C(C)C)CC(O)CC1O  
C=C1C(=CC=C2CCCC3(C)C2CCC3C(C)CC2OC(=O)C(=C)C2C)CC(O)CC1O  
C=C1C(=CC=C2CCCC3(C)C2CCC3C(C)CC2OC(=O)C(=C)C2CCCC)CC(O)C(OCCC)C1O  
C=C1C(=CC=C2CCCC3(C)C2CCC3C(C)CC2OC(=O)C(=C)C2CC(C)C)CC(O)C(OCCC)C1O  
C=C1C(=CC=C2CCCC3(C)C2CCC3C(C)CC2OC(C)O)C(=O)N2C)CC(O)CC1O  
C=C1C(=CC=C2CCCC3(C)C2CCC3C(C)CCCC(C)(C)C)CC(O)CC1O  
CC(OCCNS(=O)(=O)C(F)(F)F)C1CCC2C(=CC=C3CC(O)CC(O)C3)CCCC21C  
C=C1C(=CC=C2CCCC3(C)C2CCC3C(C)OCCCC(O)(CC)CC)CC(O)CC1C(F)F  
CCC(CC)(c1ccc(OCC(O)C(C)(C)C)c(C)c1)c1ccc(OCC(O)CCO)c(C)c1  
CCC(CC)(c1ccc(OCC(=O)C(C)C)c(C)c1)c1ccc(C(=O)NCC(=O)OC)n1C  
**CCCCS(=O)(=O)NCCCC(C)C1CCC2C(=CC=C3CC(O)CC(O)C3)CCCC21C**  
CC(OCCC(C)(C)O)C1CCC2C(=CC=C3CC(O)C4=CCOC4C3)CCCC21C  
CCC(CC)(c1ccc(OCC(=O)C(C)(C)C)c(C)c1)c1ccc(OCC(=O)C(C)(C)C)c(C)c1  
CC[Si](CC)(c1ccc(OCC(=O)C(C)(C)C)c(C)c1)c1ccc(OCC2CO2)c(C)c1  
CC(C=CCC(O)C12CC3CC(CC(C3)C1)C2)C1CCC2C(=CC=C3CC(O)CC(O)C3)CCCC21C  
C=C1C(=CC=C2CCCC3(C)C(C(C)CCC(F)F)C(O)(CC)CC)=CCC23)CC(O)CC1C(F)F  
C=C1C(O)CC(=CC=C2CCCC3(C)CCCC(C)(C)O)CC1O  
C=C1C(=CC=C2CCCC3(C)C2CCC3C(C)CCCC(C)(C)O)CC2OCC=C2C1O  
C=C1C(O)CC(=CC=C2CCCC3(C)CCCC(C)(C)O)CC1O  
CC(C=CC(=O)NO)=CC(C)C1CCC2C(=CC=C3CC(O)CC(O)C3)CCCC21C  
C=C1C(=CC=C2CCCC3(C)C2CCC3C(C)CC2CC(C)(O)C(=O)N2Cc2cc(OCC)cc(OCC)c2)CC(O)CC1O  
CCC(CC)(c1ccc(OCC(=O)C(C)(C)C)c(C)c1)c1ccc(OCC(O)C)C(C)c1  
C=C1C(=CC=C2CCCC3(C)C2CCC3C(C)OCC(=C)C2(C)CCCC2)CC(O)CC1O  
C=C(COCC(C)C1CCC2C(=CC=C3CC(O)CC(O)C3=C)CCCC21C)C1=CCCCC1(C)C  
C=C1C(=CC=C2CCCC3(C)C2CCC3C(C)CC2CC(C)(O)C(=O)N2Cc2cc(OCC)cc(OCC)c2)CC(O)CC1O  
C=C1C(=CC=C2CCCC3(C)C2CCC3C(C)CC2CC(C)(O)C(=O)N2CCCCc2ccccc2)CC(O)CC1O  
CCC(CC)(c1ccc(OCC(=O)C(C)(C)C)c(C)c1)c1ccc(C(=O)NC(CC(=O)O)C(=O)O)n1C  
CCC(CC)(c1ccc(OCC(O)C(C)(C)C)c(C)c1)c1ccc(C(=O)NC(C)O)n1C  
C=C1C(=CC=C2CCCC3(C)C2CCC3C(C)CC2CC(C)(O)C(=O)N2Cc2ccc(OCC)cc2)CC(O)CC1O  
C=C1C(=CC=C2CCCC3(C)C2CCC3C(C)CC2CC(C)(O)C(=O)N2CCCCc2cc(OCC)cc(OCC)c2)CC(O)CC1O  
Cc1ccc(-c2csc(=N)n2CC(=O)N2CCN(c3ccccc3)CC2)cc1  
CCC(CC)(c1ccc(OCC(O)C(C)(C)C)c(C)c1)c1ccc(C(=O)NCCC(=O)O)n1C  
CC(C)S(=O)(=O)c1oc(-c2cccs2)nc1S(=O)(=O)c1ccccc1  
CCC(CC)(c1ccc(OCC(=O)C(C)(C)C)c(C)c1)c1ccc(C(=O)NC(C)C(=O)O)n1C  
CC(=O)N1CCN(C(=O)Cn2c(-c3ccc(C)cc3)csc2=N)CC1  
COc1ccc(NC(c2ccccc2Cl)c2c(C)[nH]c3ccccc23)cc1OC  
N=c1scc(-c2ccc(Cl)cc2)n1CC(=O)N1CCN(c2ccccc2)CC1

Cc1 [nH] c2cccc2c1C(Nc1ccc(Cl)cc1)c1cccnc1  
 CC(C)CC(N)C(=O)NC(CC(C)C)C(=O)NC1CCOCC(O)C(O)C(O)C(O)C(=O)O)NC(=O)C(CC(C)C)NC(=O)C(CC(C)C)NC(=O)C(C)(C)C(NC1=O)C  
 COc1ccc(C(Nc2ccc(OC)c(OC)c2)c2c(C) [nH] c3cccc23)cc1  
 COC(=O)c1ccc2c(c1)C(C)C(C)C(C=Cc1ccc(OC)cc1)=[N+]2C  
 Cc1ccc(CNC(c2cccc2Cl)c2c(C) [nH] c3cc(C)ccc23)cc1  
 CCC(CC)(c1ccc(OC(O)CO)c(C)c1)c1ccc(OC(O)C(C)C)CCCc2cccc2)c(C)c1  
 Cc1 [nH] c2cccc2c1C(Nc1ccc(Cl)cc1)c1ccncc1  
 Cc1 [nH] c2cccc2c1C(Nc1ccc(Cl)cc1)c1cccc1Cl  
 Cc1 [nH] c2cccc2c1C(Nc1ccc([N+](=O)[O-])cc1)c1cccc1Cl  
 COc1ccc(NC(c2ccc(C(F)(F)F)cc2)c2c(C) [nH] c3cccc23)cc1OC  
 CC(=O)N1CCN(C(=O)Cn2c(-c3cccc3)csc2=N)CC1  
 Cc1ccc2c(C(Nc3ccc(OC(F)(F)F)cc3)c3cccc3Cl)c(C) [nH] c2c1  
 CCS(=O)(=O)c1oc(-c2cccs2)nc1S(=O)(=O)c1cccc1  
 Cc1ccc2c(C(Nc3ccc(Cl)cc3)c3cccc3Cl)c(C) [nH] c2c1  
 Cc1 [nH] c2cccc2c1C(NC1cccc1)c1cccc1Cl  
 COc1ncccc1NC(c1cccnc1)c1c(C) [nH] c2cc(C)ccc12  
 CCn1c(C(=O)NCCO)ccc1C(CC)(CC)c1ccc(OC(O)C(C)C)C(C)c(C)c1  
 COc1ccc(NC(c2cccc2Cl)c2c(C) [nH] c3cccc23)cc1  
 Cc1ccc2c(C(NC3cccc3) c3cccc3Cl)c(C) [nH] c2c1  
 CCC(CC)(c1ccc(OC(O)CO)c(C)c1)c1ccc(OC(O)C(C)C)CCc2cccc2)c(C)c1  
 CS(=O)(=O)c1ccc(C(=O)NCCCC(=O)N2CCN(c3ccc(C(F)(F)F)cc3)CC2)cc1 [N+] (=O) [O-]  
 Cc1 [nH] c2cccc2c1C(Nc1cccc1)c1ccc(Cl)cc1  
 COC(=O)c1ccc(C=CC2=[N+](C)c3ccc(OC)cc3C2(C)C)cc1  
 COc1cccc1NC(c1cccc1Cl)c1c(C) [nH] c2cccc12  
 Cc1 [nH] c2cccc2c1C(Nc1ccc(N(C)C)cc1)c1cccc1Cl  
 Cc1 [nH] c2cccc2c1C(Nc1cccc1)c1ccc(C(C)C)cc1  
 Cc1ccc2c(C(NC3ccc(C(F)(F)F)cc3)c3cccc3Cl)c(C) [nH] c2c1  
 COc1ccc(C(Nc2ccccn2)c2c(C) [nH] c3cccc23)cc1

### S4.3.3 Seeds

CC(CCCNS(C)(=O)=O)C1CCC2C(=CC=C3CC(O)CC(O)C3)CCCC21C  
 CCC(CC)(c1ccc(OC(O)C(C)C)C(C)c1)c1ccc(C(=O)NCCCC)N1C  
 C=C1C(=CC=C2CCCC3(C)C2CCC3C(C)CC2OC(=O)C(=C)C2CC)CC(O)C(OC(O)C1O  
 C=C1C(=CC=C2CCCC3(C)C2CCC3C(C)C(CCCC)CCC(C)C)O)CC(O)CC1O  
 C=C1C(O)CC(=CC=CCC(C)C)CC(C)CCCC(C)C)O)CC1O  
 CCCS(=O)(=O)c1oc(-c2cccs2)nc1S(=O)(=O)c1ccc(F)cc1  
 C=C1C(=CC=C2CCCC3(C)C2CCC3C(C)CC2OC(=O)C(=C)C2CC)CC(O)C(CCCO)C1O  
 CC(CCCCC(=O)NO)C1CCC2C(=CC=C3CC(O)CC(O)C3)CCCC21C  
 C=C1C(=CC=C2CCCC3(C)C(C4(CCC(=O)C(C)C)O)CC4)=CCC23)CC(O)CC1O  
 C=C1C(=CC=C2CCCC3(C)C2CCC3C(C)C(CCO)CCCC)CC(O)CC1O  
 N=c1sc(-c2ccc(Cl)cc2)n1CC(=O)N1CCOCC1  
 COc1ccc(C=CC2=[N+](C)c3ccc(OC)cc3C2(C)C)cc1  
 C=C1C(O)CC(=CC=C2CCCC3(C)C2CCC3C(C)C(C)CCO)CC1O  
 C=C1C(O)CC(=CC=C2CCCC3(C)C2CCC3C(C)C=CC(O)C23CC4CC(CC(C4)C2)C3)CC1O  
 C=C1C(=CC=C2CCC(C)CCCC(C)C)O)C3(C)C2CCC3C(C)CO)CC(O)CC1O  
 C=C1C(=CC=C2CCCC3(C)C2CCC3C(C)COCC(=C)C(C)C)CC(O)CC1O  
 C=C1C(=CC=C2CCCC3(C)C2CCC3C(C)C=CC(O)C2CC2)CC(O)CC1O  
 C=C1C(O)CC(=CC=C2CCCC3(C)C(C)CCCC(C)C)O)CCC23)CC1O  
 CCC(CC)(c1ccc(OC(O)C(C)C)C(C)c1)c1ccc(C(=O)NCC(=O)O)N1C  
 CC(CCCNS(N)(=O)=O)C1CCC2C(=CC=C3CC(O)CC(O)C3)CCCC21C  
 C=C1C(=CC=C2CCCC3(C)C2CCC3C(C)CCCC(C)C)O)CC(O)CC1C(F)F  
 C=C1C(=CC=C2CCCC3(C)C2CCC3C(C)COc2cccc2)CC(O)CC1O  
 CC(C)CS(=O)(=O)c1oc(-c2cccs2)nc1S(=O)(=O)c1ccc(F)cc1  
 C=C1C(=CC=C2CCCC3(C)C2CCC3C(C)CC2OC(=O)C(=C)C2CCCC)CC(O)C(C)C1O  
 CC(CCCNC(=O)CS)C1CCC2C(=CC=C3CC(O)CC(O)C3)CCCC21C  
 Cc1 [nH] c2cccc2c1C(Nc1ccc(Cl)cc1)c1nccs1

C=C1C(O)CC(=CC=C2CCCC3(C)C2CCC3C(C)C(C)CCC(C)(C)O)CC1O  
C0c1ccc(NC(c2ccc(OC(F)(F)F)cc2)c2c(C)[nH]c3ccccc23)cc1OC  
CCn1c(C(=O)NC(C)CO)ccc1C(CC)(CC)c1ccc(OCC(O)C(C)(C)C)c(C)c1  
Cc1[nH]c2ccccc2c1C(Nc1ccc(Cl)cc1)c1ncc[nH]1

## S4.4 Sample 4

### S4.4.1 Training set

C=C1C(=CC=C2CCCC3(C)C2CCC3C(C)CC2CC(C)(O)C(=O)N2Cc2cc(OCC)cc(OCC)c2)CC(O)CC1O  
CCC(CC)(c1ccc(OCC(O)C(C)(C)C)c(C)c1)c1ccc(C(=O)NC(CO)CCO)n1C  
CCC(CC)(c1ccc(OCC(O)C(C)(C)C)c(C)c1)c1ccc(C(=O)NC(C)CO)n1C  
CC(CCCC(C)(C)O)C1CCC2C(=CC=C3CC(O)C(=CCO)C(O)C3)CCCC21C  
CC(C=CC(O)C12CC3CC(CC(C3)C1)C2)C1CCC2C(=CC=C3CC(O)CC(O)C3)CCCC21C  
CCC(CC)(c1ccc(OCC(O)C(C)(C)C)c(C)c1)c1ccc(C(=O)NCC(=O)O)n1C  
C=C1C(=CC=C2CCCC3(C)C2CCC3C(C)CCCC(C)(C)O)CC(O)C(Cc2cncn2)C1O  
CCC(=CC=CC(O)(C(F)(F)F)C(F)(F)F)c1cccc(OCc2ccc(CO)c(CO)c2)c1  
C=C1C(O)CC(=CC=C2CCCC3C2CCC3C(C)CCCC(C)(C)O)CC1O  
C=C1C(=CC=C2CCCC3(C)C2CCC3C(C)CC2OC(=O)C(=C)C2CC)CC(O)C(C)C1O  
C=C1CC(CC(C)C2CCC3C(=CC=C4CC(O)CC(O)C4=C)CCCC32C)OC1=O  
CC(CCCNS(=O)(=O)C(F)(F)F)C1CCC2C(=CC=C3CC(O)CC(O)C3)CCCC21C  
N=c1scc(-c2ccccc2)n1CC(=O)N1CCN(c2ccccc2)CC1  
C=C1C(=CC=C2CCCC3(C)C2CCC3C(C)CCCC(C)(C)C)CC(O)CC1O  
Cc1[nH]c2ccccc2c1C(Nc1ccc(N(C)C)cc1)c1ccccc1Cl  
CCn1c(C(=O)NCCO)ccc1C(CC)(CC)c1ccc(OCC(O)C(C)(C)C)c(C)c1  
C=C1C(=CC=C2CCCC3(C)C2CCC3C(C)COC(=C)C2(C)CCCC2)CC(O)CC1O  
Cc1ccc(NC(c2ccccc2Cl)c2c(C)[nH]c3ccccc23)cc1  
CC(CCCC(=O)Nc1ccccc1N)C1CCC2C(=CC=C3CC(O)CC(O)C3)CCCC21C  
C=C1C(=CC=C2CCCC3(C)C2CCC3C(C)CC2CC(C)(O)C(=O)N2Cc2ccccc2)CC(O)CC1O  
C=C1C(=CC=C2CCCC3(C)C2CCC3C(C)CCCC(C)(C)O)CC(O)C(Cc2cncn2)C1O  
C=C1C(=CC=C2CCCC3(C)C2CCC3C(C)(C)CC)CC(O)C(=CCO)C1O  
C=C1C(=O)OC(CC(C)C2CCC3C(=CC=C4CC(O)C(CCCO)C(O)C4=C)CCCC32C)C1C  
C=C1C(=CC=C2CCCC3(C)C2CCC3C(C)CC2CC(C)(O)C(=O)N2CCCc2cc(OC)cc(OC)c2)CC(O)CC1O  
CC(=O)N1CCN(C(=O)Cn2c(-c3ccc(C)cc3)csc2=N)CC1  
C0c1ccc(NC(c2ccc(C(F)(F)F)cc2)c2c(C)[nH]c3ccccc23)cc1OC  
C=C1C(O)CC(=CC=C2CCCC3(C)C2CCC3C(C)C(CCCC)CC(O)(CC)CC)CC1O  
C0c1ccccc1NC(c1ccccc1Cl)c1c(C)[nH]c2ccccc12  
C=C1C(=CC=C2CCCC3(C)C2CCC3C(C)CC2OC(=O)C(=C)C2CC)CC(O)C(OCCO)C1O  
C=C1C(=CC=C2CCCC3(C)C2CCC3C(C)C(C)CCC(C)(C)O)CC(O)CC1O  
Cc1ccc2c(C(NCc3ccc(C(F)(F)F)cc3)c3ccccc3Cl)c(C)[nH]c2c1  
CCn1c(C(=O)NCC(=O)OC)ccc1C(CC)(CC)c1ccc(OCC(=O)C(C)(C)C)c(C)c1  
Cc1[nH]c2ccccc2c1C(Nc1ccc(Cl)cc1)c1ncc[nH]1  
C=C1C(=CC=C2CCCC3(C)C2CCC3C(C)CC2OC(=O)C(=C)C23CCCC3)CC(O)CC1O  
C=C1C(O)CC(=CC=C2CCCC3(C)C2CCC3C(C)C(CC)CCO)CC1O  
CCC(O)(CC)CSC(C)C1=CCC2C(=CC=C3CC(O)C(C)(O)C(O)C3)CCCC12C  
Cc1[nH]c2ccccc2c1C(NCc1ccccc1)c1ccccc1Cl  
CC(CCCC(=O)Nc1ccccc1N)C1CCC2C(=CC=C3CC(O)CC(O)C3)CCCC21C  
C=C1C(O)CC(=CC=C2CCCC3(C)C2CCC3C(C)OCC(C)C(C)(C)O)CC1O  
CS(=O)(=O)c1ccc(C(=O)NCCCC(=O)N2CCN(c3ccc(C(F)(F)F)cc3)CC2)cc1[N+](=O)[O-]  
CCn1c(C(=O)NC(C)CO)ccc1C(CC)(CC)c1ccc(OCC(O)C(C)(C)C)c(C)c1  
C=C1C(=O)OC(CC(C)C2CCC3C(=CC=C4CC(O)C(C)C(O)C4=C)CCCC32C)C1C  
CC(CCCNS(C)(=O)=O)C1CCC2C(=CC=C3CC(O)CC(O)C3)CCCC21C  
CCC(CC)(c1ccc(OCC(=O)C(C)(C)C)c(C)c1)c1ccc(OCC(O)CO)c(C)c1  
CCCS(=O)(=O)c1oc(-c2cccs2)nc1S(=O)(=O)c1ccc(F)cc1  
N=c1scc(-c2ccc(Cl)cc2)n1CC(=O)N1CCOCC1  
C=C1C(=CC=C2CCC(C)CCCC(C)(C)O)C3(C)C2CCC3C(C)CCO)CC(O)CC1O  
C=C1C(=CC=C2CCCC3(C)C2CCC3C(C)COCc2ccccc2)CC(O)CC1O  
CC(CCCNS(C)(=O)=O)C1CCC2C(=CC=C3CC(O)CC(O)C3)CCCC21C



C=C1C(=CC=C2CCCC3(C)C2CCC3C(C)CC2CC(C)(O)C(=O)N2CCc2cc(OC)cc(OC)c2)CC(O)CC10  
C=C1C(=CC=C2CCC(CCCCC(C)(C)O)C3(C)C2CCC3C(C)O)CC(O)CC10  
C=C1C(=CC=C2CCCC3(C)C(C(C)CCCC(C)(C)O)CCC23C)CC(O)CC10  
Cc1[nH]c2ccccc2c1C(Nc1ccc(Cl)cc1)c1ccccc1Cl  
C=C1C(=CC=C2CCCC3(C)C2CCC3C(C)C0CC(=C)C(C)(C)CC(O)CC10  
C=C1C(O)CC(=CC=C2CCCC3(C)C2CCC3C(C)C(C)CCC(C)(C)O)CC10  
C=C1C(O)CC(=CC=CCCC(C)CCCC(C)(C)O)CC10  
C=C1C(=CC=C2CCCC3(C)C2CCC3C(C)CC2OC(=O)C(=C)C2CCC)CC(O)C(OCCCC)C10  
CCC(CC)(c1ccc(OC(C)C(C)(C)C)c(C)c1)c1ccc(OC(CCO)CCO)c(C)c1  
Cc1ccc2c(C(Nc3ccc(OC(F)(F)F)cc3)c3ccccc3Cl)c(C)[nH]c2c1  
C=C1C(=CC=C2CCCC3(C)C2CCC3C(C)CC2OC(=O)C(=C)C2(C)C)CC(O)CC10  
C=C1C(=CC=C2CCCC3(C)C2CCC3C(C)CC2CC(C)(O)C(=O)N2CCc2ccccc2)CC(O)CC10  
C=C1C(=CC=C2CCCC3(C)C2CCC3C(C)CC2CC(C)(O)C(=O)N2Cc2cc(OC)cc(OC)c2)CC(O)CC10  
C=C1C(O)CC(=CC=C2CCCC3(C)CCCC(C)(C)O)CCC23)CC10  
C=C1C(=CC=C2CCCC3(C)C2CCC3C(C)CCCC(C)(C)O)CC(O)C(Cc2nccn2)C10  
C=C1C(=CC=C2CCCC3(C)C2CCC3C(C)CCCC(C)(C)O)CC(O)CC10  
C=C1C(=CC=C2CCCC3(C)C2CCC3C(C)OCCCC(O)(CC)CC)CC(O)CC1C(F)F  
COc1ccc(NC(c2ccccc2Cl)c2c(C)[nH]c3ccccc23)cc1OC  
CC(C)S(=O)(=O)c1oc(-c2cccs2)nc1S(=O)(=O)c1ccccc1  
CCC(CC)(c1ccc(OC(C)O)c(C)c1)c1ccc(OC(C)C(C)C)CCCc2ccccc2)c(C)c1  
C=C1C(=CC=C2CCCC3(C)C2CCC3C(C)CC(C)C)CC(O)C(=CCO)C10  
C=C1C(=CC=C2CCCC3(C)C2CCC3C(C)CC2OC(=O)C(=C)C2CCC)CC(O)C(C)C10  
Cc1[nH]c2ccccc2c1C(Nc1cccn1)c1ccc(C(C)C)cc1  
CCC(O)(CC)CSC(C)C1=CCC2C(=CC=C3CC(O)C(OCCO)C(O)C3)CCCC12C  
C=C1C(=CC=C2CCCC3(C)C(C4(C)CCCC(C)(C)O)CC4)=CCC23)CC(O)CC10  
C=C1C(=CC=C2CCCC3(C)C2CCC3C(C)CCCC(C)(C)O)CC(O)C(Cc2cnc2)C10  
C=C1C(=CC=C2CCCC3(C)C2CCC3C(C)C(C)CCC)CCC(C)(C)O)CC(O)CC10  
C=C1C(=CC=C2CCCC3(C)C2CCC3C(C)CSc2ccc(C(C)(C)O)cc2)CC(O)CC10  
CCC(CC)(c1ccc(OC(=O)C(C)(C)C)c(C)c1)c1ccc(C(=O)NCC(=O)OC)n1C  
C=C1C(O)CC(=CC=C2CCCC3(C)C2CCC3C(C)CC#CC(O)CC23CC4CC(CC(C4)C2)C3)CC10  
CCOc1ccc(C=CC2=[N+](C)c3ccc(C(=O)OC)cc3C2(C)C)cc1  
C=C1C(=CC=C2CCCC3(C)C2CCC3C(C)CCCC(C)(C)O)CC(O)CC1C(F)F  
CCOC1C(O)CC(=CC=C2CCCC3(C)C(C(C)SCCC(O)(CC)CC)=CCC23)CC10  
C=C1C(O)CC(=CC=C2CCCC3(C)C(C)CCCC(C)(C)O)CCC23)CC10  
C=C1C(O)CC(=CC=C2CCCC3(C)C2CCC3C(C)CC#CC(O)C23CC4CC(CC(C4)C2)C3)CC10  
C=C1C(=CC=C2CCCC3(C)C2CCC3C(C)CC2OC(=O)C(=C)C2CC)CC(O)CC10  
Cc1ccc2c(C(Nc3ccc(Cl)cc3)c3ccccc3Cl)c(C)[nH]c2c1  
CC(O)CCC(C)(C)O)C1CCC2C(=CC=C3CC(O)C4=CCOC4C3)CCCC21C  
CC(O)CC(=O)O)C1CCC2C3CCC4CC(O)CCC4(C)C3CCC12C  
C=C1C(=CC=C2CCCC3(C)C2CCC3C(C)COc2ccc(C(C)(C)O)cc2)CC(O)CC10  
C=C1C(=CC=C2CCCC3(C)C2CCC3C(C)CC2CC(C)(O)C(=O)N2CCCc2ccccc2)CC(O)CC10  
Cc1ccc(GNC(c2ccccc2Cl)c2c(C)[nH]c3cc(C)ccc23)cc1  
C=C1C(O)CC(=CC=C2CCCC3(C)C2CCC3C(C)C(C)CC)CC(O)CC10  
C=C1C(O)CC(=CC=C2CCCC3(C)C2CCC3C(C)C=CC(O)C23CC4CC(CC(C4)C2)C3)CC10  
C=C1C(O)CC(=CC=C2CCCC3(C)C2CCC3C(C)C=CC(O)C23CC4CC(CC(C4)C2)C3)CC10  
C=C1C(=CC=C2CCCC3(C)C2CCC3C(C)CCCC(C)(C)O)CC2OCC=C2C10  
CCC(CC)(c1ccc(OC(=O)C(C)(C)C)c(C)c1)c1ccc(OC(=O)C(C)(C)C)c(C)c1  
C=C1C(=CC=C2CCCC3(C)C2CCC3C(C)CC2OC(=O)C(=C)C2CCCC)CC(O)C(C)C10  
CCCc1cc(C(O)(CC)CC)ccc1-c1cc(CCc2ccc(CO)c(CO)c2)ccc1C  
Cc1[nH]c2ccccc2c1C(Nc1ccc(Cl)cc1)c1ccncc1  
COc1ccc(NC(c2nccs2)c2c(C)[nH]c3ccccc23)cc1OC

#### S4.4.2 Testing set

The SMILES strings of the recreated VDR ligands are highlighted in yellow.

C=C1C(O)CC(=CC=C2CCCC3(C)C2CCC3C(C)CCCC(C)O)CC10  
C=C1C(=CC=C2CCCC3(C)C2CCC3C(C)CCCC(C)(C)O)CC(O)C(Cc2nccn2)C10

C=C1C(=CC=C2CCCC3(C)C2CCC3C(C)C(CC)CCC(C)(C)O)CC(O)CC1O  
 CC(O)CCCC(C)C1CCC2C(=CC=C3CC(O)C(C)C(O)C3)CCCC21C  
 C=C1C(O)CC(=CC=C2CCCC3(C)C2CCC3C(C)C(C)(C)CCC(C)(C)O)CC1O  
 CCC(O)(CC)CSC(C)C1=CCC2C(=CC=C3CC(O)C(=CCO)C(O)C3)CCCC12C  
 C=C1C(O)CC(=CC=C2CCCC3(C)C2CCC3C(C)CCC(O)(CC)CC)CC1O  
 CCC(CC)(c1ccc(OCC(O)CO)c(C)c1)c1ccc(OCC(O)C(C)(C)C)c(C)c1  
 CCC(CC)(c1ccc(OCC(O)C(C)(C)C)c(C)c1)c1ccc(OCC(O)CO)c(C)c1  
 CC(CCCC(C)(C)O)C1CCC2C(=CC=C3CC(O)C(=CCF)C(O)C3)CCCC21C  
 CCOCC1C(O)CC(=CC=C2CCCC3(C)C(C)C)SCCCC(O)(CC)CC)=CCC23)CC1O  
**C=C1C(O)CC(=CC=C2CCCC3(C)C2CCC3C(C)CCCC(C)(C)O)CC1O**  
 C=C1C(O)CC(=CC=C2CCCC3(C)C2CCC3C(C)C(CCCC)CC(C)(C)O)CC1O  
 C=C1C(=CC=C2CCCC3(C)C2CCC3C(C)CCCC(C)(C)O)CC(O)C2=CCOC12  
 C=C1CCC(O)CC1=CC=C1CCCC2(C)C1CCC2C(C)CCCC(C)C  
 C=C1C(=CC=C2CCCC3(C)C2CCC3C(C)CCCC(C)(C)O)CC(O)C(CCn2cmm2)C1O  
 C=C1C(O)CC(=CC=C2CCCC3(C)C2CCC3C(C)C(CCO)CCCC)CC1O  
 C=C1C(O)CC(=CC=C2CCCC3(C)C2CCC3C(C)C(CCCC)CCC(C)(C)O)CC1O  
**C=C1C(=CC=C2CCCC3(C)C2CCC3C(C)CC)CC(O)C(=CCCO)C1O**  
 C=C1C(=CC=C2CCCC3(C)C2CCC3C(C)C=CC(O)C2CC2)CC(O)CC1O  
 C=C1C(=CC=C2CCCC3(C)C2CCC3C(C)C=CC(O)C2(C=CC(=O)OCC)CC2)CC(O)CC1O  
 C=C1C(=CC=C2CCCC3(C)C2CCC3C(C)C=CC(O)C2(C(=O)OCCC)CC2)CC(O)CC1O  
 CC(CCCC(C)(C)O)C1CCC2C(=CC=C3CC(O)CC(O)C3=O)CCCC21C  
 C=C1C(=CC=C2CCCC3(C)C(C4(CCC(=O)C(C)(C)O)CC4)=CCC23)CC(O)CC1O  
 C=C1CC(CC(C)C)C2CCC3C(=CC=C4CC(O)C(=C)C(O)C4)CCCC32C)OC1=O  
 C=C1C(O)CC(=CC=C2CCCC3(C)C2CCC3C(C)C(CCCC)CCCO)CC1O  
 CCC(CC)(c1ccc(OCC(O)C(C)(C)C)c(C)c1)c1ccc(OCC(O)C(O)CO)c(C)c1  
 CCC(CC)(c1ccc(OCC(O)CO)c(C)c1)c1ccc(OCC(O)C(C)(C)C)c(C)c1  
 C=C1C(=CC=C2CCCC3(C)C2CCC3C(C)C(CCO)CCCC)CC(O)CC1O  
 C=C1C(O)CC(=CC=C2CCCC3(C)C2CCC3C(C)C(CC)CC(C)(C)O)CC1O  
 CCC(=CC=CC(O)(C(F)(F)F)C(F)(F)F)c1cccc(CCc2ccc(CO)c(CO)c2)c1  
 C=C1C(O)CC(=CC=CCC(C)(C)CC(C)CCCC(C)(C)O)CC1O  
 CCCc1cc(C(O)(CC)CC)ccc1-c1cc(OCc2ccc(CO)c(CO)c2)ccc1CC  
 C=C1C(O)CC(=CC=C2CCCC3(C)C2CCC3C(C)C(CC)CCC(C)(C)O)CC1O  
 C=C1C(O)CC(=CC=C2CCCC3(C)C2CCC3C(C)C(C)CCCC(C)(C)O)CC1O  
 C=C1C(O)CC(=CC=CCC(C)CC(C)CCCC(C)(C)O)CC1O  
 C=C1C(O)CC(=CC=C2CCCC3(C)C2CCC3C(C)C=CCC(O)CC23CC4CC(CC(C4)C2)C3)CC1O  
 C=C1C(=CC=C2CCCC3(C)C2CCC3C(C)C(CCCC)CC(O)C(C)C)CC(O)CC1O  
 CCn1c(C(=O)NC(C)C(=O)O)ccc1C(CC)(CC)c1ccc(OCC(O)C(C)(C)C)c(C)c1  
 C=C1C(=CC=C2CCC(C)CCCC(C)(C)O)C3(C)C2CCC3C(C)CCO)CC(O)CC1O  
 C=C1C(=CC=C2CCCC3(C)C2CCC3C(C)CC2OC(=O)C(=C)C2CCC)CC(O)CC1O  
 C=C1C(=O)OC(CC(C)C)C2CCC3C(=CC=C4CC(O)C(O)CCO)C(O)C4=C)CCCC32C)C1C  
 C=C1C(=CC=C2CCCC3(C)C2CCC3C(C)CC2OC(=O)C(=C)C2CCC)CC(O)C(CCCO)C1O  
 C=C1C(=CC=C2CCCC3(C)C2CCC3C(C)CCC(O)C(C)C)CC(O)CC1O  
 C=C1C(=CC=C2CCCC3(C)C2CCC3C(C)CC2OC(=O)C(=C)C2C)CC(O)CC1O  
 C=C1C(=CC=C2CCCC3(C)C2CCC3C(C)CC2OC(=O)C(=C)C2CCC)CC(O)C(CCCO)C1O  
 C=C1C(=CC=C2CCCC3(C)C2CCC3C(C)CC2OC(=O)C(=C)C2CCC)CC(O)C(CCCO)C1O  
 C=C1C(=CC=C2CCCC3(C)C2CCC3C(C)CC2OC(=O)C(=C)C2CC(C)C)CC(O)CC1O  
 C=C1C(=CC=C2CCCC3(C)C2CCC3C(C)CC2OC(=O)C(=C)C2CC(C)C)CC(O)C(CCCO)C1O  
 C=C1C(=CC=C2CCCC3(C)C2CCC3C(C)CC2OC(=O)C(=C)C2CC(C)C)CC(O)C(O)C(CCCO)C1O  
 C=C1C(=CC=C2CCCC3(C)C2CCC3C(C)CC2OC(=O)C(=O)N2C)CC(O)CC1O  
 C=C1C(=CC=C2CCCC3(C)C2CCC3C(C)CC2OC(=O)C(=C)C2CC(C)C)CC(O)C(C)C1O  
 CC(CCCNS(=O)(=O)c1cccc1)C1CCC2C(=CC=C3CC(O)CC(O)C3)CCCC21C  
 CCCC(=O)(=O)NCCCC(C)C1CCC2C(=CC=C3CC(O)CC(O)C3)CCCC21C  
 CC(CCCNC(=O)CS)C1CCC2C(=CC=C3CC(O)CC(O)C3)CCCC21C  
 CC[Si](CC)(c1ccc(OCC(=O)C(C)(C)C)c(C)c1)c1ccc(OCC2CO2)c(C)c1  
 C=C1C(=CC=C2CCCC3(C)C2CCC3C(C)COCC#CC(C)(C)C)CC(O)CC1O  
 CCC(=CC=CC(O)(CC)CC)c1cccc(OCc2ccc(CO)c(CO)c2)c1  
 C=C1C(=CC=C2CCCC3(C)C(C)C)CCC(F)(F)C(O)(CC)CC)=CCC23)CC(O)CC1C(F)F

C0C0CCC=C1C(0)CC(=CC=C2CCCC3(C)C2CCC3C(C)CCCC(C)(C)0)CC10  
 C=C1C(0)CC(=CC=CCC(C)=CC(C)CCCC(C)(C)0)CC10  
 CC(C=CC(=0)N0)=CC(C)C1CCC2C(=CC=C3CC(0)CC(0)C3)CCCC21C  
 CC(C=CC(=0)Nc1cccc1N)=CC(C)C1CCC2C(=CC=C3CC(0)CC(0)C3)CCCC21C  
 CCn1c(C(=0)NC(0)CC0)ccc1C(CC)(CC)c1ccc(0CC(0)C(C)(C)C)c(C)c1  
 CCC(CC)(c1ccc(0CC(0)C(C)(C)C)c(C)c1)c1ccc(C(=0)NCCC0)n1C  
 C=C1C(=CC=C2CCCC3(C)C2CCC3C(C)CC2CC(C)(0)C(=0)N2Cc2cc(0CCC)cc(0CCC)c2)CC(0)CC10  
 CC(CCCCCNS(N)(=0)=0)C1CCC2C(=CC=C3CC(0)CC(0)C3)CCCC21C  
 CC(CCCCC(=0)N0)C1CCC2C(=CC=C3CC(0)CC(0)C3)CCCC21C  
 CC(CCCCCNS(N)(=0)=0)C1CCC2C(=CC=C3CC(0)CC(0)C3)CCCC21C  
 C=C(C0CC(C)C1CCC2C(=CC=C3CC(0)CC(0)C3=C)CCCC21C)C1=CCCC1(C)C  
 C=C1C(=CC=C2CCCC3(C)C2CCC3C(C)CC2CC(C)(0)C(=0)N2CCCCc2cccc2)CC(0)CC10  
 CCC(CC)(c1ccc(0CC(=0)C(C)(C)C)c(C)c1)c1ccc(C(=0)NC(CC(=0)0)C(=0)0)n1C  
 C=C1C(=CC=C2CCCC3(C)C2CCC3C(C)CC2CC(C)(0)C(=0)N2Cc2cc(0CCC)cc(0CCC)c2)CC(0)CC10  
 C0c1ccc(C(Nc2ccc(C(F)(F)F)cc2)c2c(C)[nH]c3cccc23)cc1  
**Cc1ccc(NC(c2cccc2Cl)c2c(C)[nH]c3cccc23)cc1C**  
 C=C1C(=CC=C2CCCC3(C)C2CCC3C(C)CC2CC(C)(0)C(=0)N2Cc2ccc(0C)cc2)CC(0)CC10  
 CCC(CC)(c1ccc(0CC(=0)C(C)(C)C)c(C)c1)c1ccc(C(=0)NCCC(=0)0C)n1C  
 Cc1ccc(-c2csc(=N)n2CC(=0)N2CCN(c3cccc3)CC2)cc1  
 CCC(CC)(c1ccc(0CC(0)C(C)(C)C)c(C)c1)c1ccc(C(=0)NCCC(=0)0)n1C  
 Nc1nc2ccc(S(=0)(=0)N3CCCC3)cc2s1  
 C0c1ccc(NC(c2ccc(0C(F)(F)F)cc2)c2c(C)[nH]c3cccc23)cc10C  
 CC(=0)N1CCN(C(=0)Cn2c(-c3ccc(Cl)cc3)csc2=N)CC1  
 CCC(CC)(c1ccc(0CC(=0)C(C)(C)C)c(C)c1)c1ccc(C(=0)NC(C)C(=0)0)n1C  
 N=c1sc(-c2ccc(Cl)cc2)n1CC(=0)N1CCN(c2cccc2)CC1  
 Cc1[nH]c2cccc2c1C(Nc1ccc(Cl)cc1)c1cccnc1  
 CC(C)CC(N)C(=0)NC(CC(C)C)C(=0)NC1C0CC(0)C(0)C0CCC(C(=0)0)NC(=0)C(CC(C)C)NC(=0)C(CC(C)C)NC(=0)C(C)(C)NC1=0  
 C0c1ccc(C(Nc2ccc(0C)c(0C)c2)c2c(C)[nH]c3cccc23)cc1  
 C0C(=0)c1ccc2c(c1)C(C)(C)C(C=Cc1ccc(0C)cc1)=[N+]2C  
 CN1CCN(C(=0)Cn2c(-c3ccc(Cl)cc3)csc2=N)CC1  
 Cc1[nH]c2cccc2c1C(Nc1ccc(Cl)cc1)c1ncs1  
 C0c1ccc(C=CC2=[N+](C)c3ccc(0C)cc3C2(C)C)cc1  
 Cc1[nH]c2cccc2c1C(Nc1ccc([N+](=0)[O-])cc1)c1cccc1C1  
 CC(=0)N1CCN(C(=0)Cn2c(-c3cccc3)csc2=N)CC1  
 CCS(=0)(=0)c1oc(-c2cccs2)nc1S(=0)(=0)c1cccc1  
 C0c1ncccc1NC(c1cccnc1)c1c(C)[nH]c2cc(C)ccc12  
 C0c1ccc(NC(c2cccc2Cl)c2c(C)[nH]c3cccc23)cc1  
 Cc1ccc2c(C(Nc3ccc(C(F)(F)F)cc3)c3cccc3Cl)c(C)[nH]c2c1  
 Cc1ccc2c(C(NC3cccc3)c3cccc3Cl)c(C)[nH]c2c1  
 CC(C)CS(=0)(=0)c1oc(-c2cccs2)nc1S(=0)(=0)c1ccc(F)cc1  
 C0C(=0)c1ccc2c(c1)C(C)(C)C(C=Cc1ccc(0)cc1)=[N+]2C  
 Cc1ccc2c(C(Nc3cccnc3)c3cccc3Cl)c(C)[nH]c2c1  
 CCC(CC)(c1ccc(0CC(0)0)c(C)c1)c1ccc(0CC(0)C(C)C)CCc2cccc2)c(C)c1  
 C0c1ccc2c(C(Nc3ccc(Cl)cc3)c3cccc3Cl)c(C)[nH]c2c1  
 Cc1[nH]c2cccc2c1C(Nc1cccc1)c1ccc(Cl)cc1  
 C0C(=0)c1ccc(C=CC2=[N+](C)c3ccc(0C)cc3C2(C)C)cc1  
**Cc1[nH]c2cccc2c1C(Nc1cccc1)c1cccc1C1**  
 C0c1ccc(NC(c2cccc2Cl)c2c(C)[nH]c3cc(C)ccc23)cc10C  
 C0c1ccc(C(Nc2cccn2)c2c(C)[nH]c3cccc23)cc1

### S4.4.3 Seeds

C=C1C(=CC=C2CCCC3(C)C2CCC3C(C)C(CCCC)CCC(C)(C)0)CC(0)CC10  
 C=C1C(=CC=C2CCCC3(C)C2CCC3C(C)CCCC(C)(C)0)CC(0)C(Cc1nccn2)C10  
 C=C1C(0)CC(=CC=CCCC(C)CCCC(C)(C)0)CC10  
 Cc1ccc(NC(c2cccc2Cl)c2c(C)[nH]c3cccc23)cc1  
 C0C1ccc(C=CC2=[N+](C)c3ccc(C(=0)0C)cc3C2(C)C)cc1

CCC(CC) (c1ccc(OCC(O)CO)c(C)c1)c1ccc(OCC(O)C(C)(C)CCCc2ccccc2)c(C)c1  
 CC(OCCC(C)(C)O)C1CCC2C(=CC=C3CC(O)C(=CCO)C(O)C3)CCCC21C  
 Cc1ccc2c(C(Nc3ccc(O(F)(F)F)cc3)c3ccccc3Cl)c(C)[nH]c2c1  
 Cc1[nH]c2ccccc2c1C(Nc1ccc(Cl)cc1)c1ccccc1Cl  
 C=C1C(=CC=C2CCCC3(C)C2CCC3C(C)COCc2ccccc2)CC(O)CC10  
 COc1ccc(NC(c2ccccc2Cl)c2c(C)[nH]c3ccccc23)cc1OC  
 C=C1C(O)CC(=CC=C2CCCC3(C)C2CCC3C(C)CC#CC(O)C23CC4CC(CC(C4)C2)C3)CC10  
 C=C1C(O)CC(=CC=C2CCCC3C(C)CC(C)O)CCC23)CC10  
 C=C1C(=CC=C2CCCC3(C)C2CCC3C(C)(C)CC)CC(O)C(=CCO)C10  
 CCCc1cc(C(O)(CC)CC)ccc1-c1cc(CCc2ccc(CO)c(CO)c2)ccc1C  
 N=c1scc(-c2ccc(Cl)cc2)n1CC(=O)N1CCOCC1  
 CCCS(=O)(=O)c1oc(-c2cccs2)nc1S(=O)(=O)c1ccc(F)cc1  
 C=C1C(=CC=C2CCC(C)CC(C)O)C3(C)C2CCC3C(C)CO)CC(O)CC10  
 C=C1C(=CC=C2CCCC3(C)C2CCC3C(C)CC2OC(=O)C(=C)C2CCCC)CC(O)C(C)C10  
 Cc1[nH]c2ccccc2c1C(NC1CCCC1)c1ccccc1Cl  
 Cc1[nH]c2ccccc2c1C(Nc1ccc(Cl)cc1)c1cncnc1  
 C=C1C(O)CC(=CC=C2CCCC3(C)C(C)CC(C)O)CCC23)CC10  
 C=C1C(O)CC(=CC=C2CCCC3C2CCC3C(C)CCCC(C)(C)O)CC10  
 C=C1C(=CC=C2CCCC3(C)C2CCC3C(C)CC(C)C)CC(O)C(=CCO)C10  
 CC(OCCC(=O)Nc1ccccc1N)C1CCC2C(=CC=C3CC(O)CC(O)C3)CCCC21C  
 COc1ccc(NC(c2ccc(C(F)(F)F)cc2)c2c(C)[nH]c3ccccc23)cc1OC  
 C=C1C(=CC=C2CCCC3(C)C2CCC3C(C)CC2CC(C)(O)C(=O)N2Cc2ccccc2)CC(O)CC10  
 CCn1c(C(=O)NCC(=O)OC)ccc1C(CC)(CC)c1ccc(OCC(=O)C(C)(C)C)c(C)c1  
 Cc1[nH]c2ccccc2c1C(Nc1ccc(N(C)C)cc1)c1ccccc1Cl  
 CC(OCCC(=O)Nc1ccccc1N)C1CCC2C(=CC=C3CC(O)CC(O)C3)CCCC21C

## S4.5 Sample 5

### S4.5.1 Training set

CC(=O)N1CCN(C(=O)Cn2c(-c3ccc(C)cc3)csc2=N)CC1  
 C=C1C(=CC=C2CCC(C)CC(C)O)C3(C)C2CCC3C(C)CCO)CC(O)CC10  
 Cc1ccc2c(C(Nc3ccc(O(F)(F)F)cc3)c3ccccc3Cl)c(C)[nH]c2c1  
 CC(OCCC(C)(C)O)C1CCC2C(=CC=C3CC(O)C(=CCO)C(O)C3)CCCC21C  
 C=C1C(O)CC(=CC=C2CCCC3(C)C(C)CC(C)O)CCC23)CC10  
 COc1ccc(C(Nc2ccc(C(F)(F)F)cc2)c2c(C)[nH]c3ccccc23)cc1  
 C=C1C(=CC=C2CCCC3(C)C2CCC3C(C)CC(C)C)CC(O)CC10  
 CCC(CC) (c1ccc(OCC(=O)C(C)(C)C)c(C)c1)c1ccc(OCC(=O)C(C)(C)C)c(C)c1  
 CC(OCCC(=O)Nc1ccccc1N)C1CCC2C(=CC=C3CC(O)CC(O)C3)CCCC21C  
 Cc1ccc2c(C(Nc3ccccc3)c3ccccc3Cl)c(C)[nH]c2c1  
 CCn1c(C(=O)NCC(=O)OC)ccc1C(CC)(CC)c1ccc(OCC(=O)C(C)(C)C)c(C)c1  
 C=C1C(=CC=C2CCCC3(C)C(C)C)CCCC(C)(C)O)CCC23)CC(O)CC10  
 C=C1CCC(O)CC1=CC=C1CCCC2(C)C1CCC2C(C)CCCC(C)C  
 CCC(CC) (c1ccc(OCC(O)C(C)(C)C)c(C)c1)c1ccc(C(=O)NCCC(=O)O)n1C  
 C=C1C(=CC=C2CCCC3(C)C2CCC3C(C)CCCC(C)(C)O)CC(O)C2=CCOC12  
 C=C1C(=CC=C2CCCC3(C)C2CCC3C(C)CCCC(C)(C)O)CC(O)C(Cn2cnm2)C10  
 C=C1C(=CC=C2CCCC3(C)C2CCC3C(C)CCCC(C)(C)O)CC(O)CC1C(F)F  
 C=C1C(O)CC(=CC=CCC(C)CC(C)CCCC(C)(C)O)CC10  
 CC(OCCNS(=O)(=O)C(F)(F)F)C1CCC2C(=CC=C3CC(O)CC(O)C3)CCCC21C  
 C=C1C(=CC=C2CCCC3(C)C2CCC3C(C)CC2OC(=O)C(=C)C2CC)CC(O)C(C)C10  
 C=C1C(=CC=C2CCCC3(C)C2CCC3C(C)C(C)CCC(C)C)CC(O)CC10  
 C=C1C(O)CC(=CC=C2CCCC3(C)C2CCC3C(C)C(C)CCC(C)CCO)CC10  
 C=C1C(=CC=C2CCCC3(C)C(C4(C)CC(C)(C)O)CC4)=CCC23)CC(O)CC10  
 C=C1C(=CC=C2CCC(C)CC(C)O)C3(C)C2CCC3C(C)CO)CC(O)CC10  
 C=C1C(O)CC(=CC=C2CCCC3(C)C2CCC3C(C)C(C)CC)CC10  
 CCn1c(C(=O)NC(C)CO)ccc1C(CC)(CC)c1ccc(OCC(O)C(C)(C)C)c(C)c1  
 CCn1c(C(=O)NC(C)C(=O)O)ccc1C(CC)(CC)c1ccc(OCC(O)C(C)(C)C)c(C)c1  
 CCC(=CC=CC(O)(CC)CC)c1ccccc1Cc2ccc(CO)c(CO)c2)c1

CC(CCCNS(C) (=O)=O)C1CCC2C(=CC=C3CC(O)CC(O)C3)CCCC21C  
 CCCS(=O) (=O) c1oc(-c2cccs2)nc1S(=O) (=O) c1ccc(F)cc1  
 CCC(CC) (c1ccc(OCC(O)C(C)C)C(C)C)c(C)c1c1ccc(OCC(O)C(O)CO)c(C)c1  
 Cc1ccc(-c2csc(=N)n2CC(=O)N2CCN(c3ccccc3)CC2)cc1  
 C=C1C(=CC=C2CCCC3(C)C2CCC3C(C)CC(C)C)CC(O)C(=CCO)C1O  
 COc1ncccc1NC(c1cccnc1)c1c(C)[nH]c2cc(C)ccc12  
 CCC(CC) (c1ccc(OCC(O)C(C)C)C(C)C)c(C)c1c1ccc(C(=O)NCC(=O)O)n1C  
 COc1ccc(C(Nc2cccn2)c2c(C)[nH]c3ccccc23)cc1  
 CC(=O)N1CCN(C(=O)Cn2c(-c3ccccc3)csc2=N)CC1  
 C=C1C(=CC=C2CCCC3(C)C2CCC3C(C)CC2OC(=O)C(=C)C2CC)CC(O)C(OCCCC)C1O  
 CC(CCCNC(=O)CS)C1CCC2C(=CC=C3CC(O)CC(O)C3)CCCC21C  
 CCCc1cc(C(O)(CC)CC)ccc1-c1cc(OCC2ccc(CO)c(CO)c2)ccc1CC  
 C=C1C(=CC=C2CCCC3(C)C2CCC3C(C)CC2CC(C)(O)C(=O)N2Cc2ccccc2)CC(O)CC1O  
 COc1ccc(NC(c2ccccc2Cl)c2c(C)[nH]c3cc(C)ccc23)cc1OC  
 C=C1C(=CC=C2CCCC3(C)C2CCC3C(C)CC2CC(C)(O)C(=O)N2CCCCc2ccccc2)CC(O)CC1O  
 C=C1C(=CC=C2CCCC3(C)C2CCC3C(C)CC2OC(=O)C(=C)C23CCCC3)CC(O)CC1O  
 Cc1[nH]c2ccccc2c1C(Nc1ccc(N(C)C)cc1)c1ccccc1Cl  
 C=C1C(=CC=C2CCCC3(C)C2CCC3C(C)COC(=C)C(C)C)CC(O)CC1O  
 CCC(CC) (c1ccc(OCC(=O)C(C)C)C(C)C)c(C)c1c1ccc(C(=O)NC(CC(=O)O)C(=O)O)n1C  
 C=C1C(O)CC(=CC=CCC(C)=CC(C)CCCC(C)C)O)CC1O  
 Cc1ccc(CNC(c2ccccc2Cl)c2c(C)[nH]c3cc(C)ccc23)cc1  
 Cc1ccc2c(C(Nc3ccc(C(F)F)cc3)c3ccccc3Cl)c(C)[nH]c2c1  
 C=C1C(=CC=C2CCCC3(C)C2CCC3C(C)CC2CC(C)(O)C(=O)N2Cc2cc(OCC)cc(OCC)c2)CC(O)CC1O  
 Cc1[nH]c2ccccc2c1C(Nc1ccc(Cl)cc1)c1cnc1  
 C=C1C(=O)OC(C)C)C2CCC3C(=CC=C4CC(O)C(CCCO)C(O)C4=C)CCCC32C)C1C  
 C=C1C(=CC=C2CCCC3(C)C2CCC3C(C)COCc2ccccc2)CC(O)CC1O  
 C=C1C(=CC=C2CCCC3(C)C2CCC3C(C)CC2OC(=O)C(=C)C2CCC)CC(O)C(OCCCC)C1O  
 C=C1C(O)CC(=CC=C2CCCC3(C)C2CCC3C(C)C=CCC(O)C23CC4CC(CC(C4)C2)C3)CC1O  
 C=C1C(=CC=C2CCCC3(C)C2CCC3C(C)C(C)CCC(C)(C)O)CC(O)CC1O  
 CCC(CC) (c1ccc(OCC(O)C(C)C)C(C)C)c(C)c1c1ccc(OCC(O)CCO)c(C)c1  
 C=C1C(=CC=C2CCCC3(C)C2CCC3C(C)C(CCO)CCCC)CC(O)CC1O  
 C=C1C(=O)OC(C)C)C2CCC3C(=CC=C4CC(O)C(OCCCC)C(O)C4=C)CCCC32C)C1C  
 CCC(CC) (c1ccc(OCC(O)C(C)C)C(C)C)c(C)c1c1ccc(C(=O)NC(C)CO)n1C  
 C=C1C(=CC=C2CCCC3(C)C2CCC3C(C)COC#CC(C)C)CC(O)CC1O  
 C=C1C(O)CC(=CC=C2CCCC3C(C)C)O)CC23)CC1O  
 C=C1C(=CC=C2CCCC3(C)C2CCC3C(C)CC2OC(=O)C(=C)C2CC(C)C)CC(O)C(C)C1O  
 CCn1c(C(=O)NCCO)ccc1C(CC)(CC)c1ccc(OCC(O)C(C)C)C(C)c1  
 C=C1C(=CC=C2CCCC3(C)C2CCC3C(C)C(CCC)CC(O)C(C)C)CC(O)CC1O  
 COc1ccccc1NC(c1ccccc1Cl)c1c(C)[nH]c2ccccc12  
 C=C1C(O)CC(=CC=C2CCCC3(C)C2CCC3C(C)C(C)CC(O)(CC)CC)CC1O  
 N=c1scc(-c2ccc(Cl)cc2)n1CC(=O)N1CCOCC1  
 Cc1[nH]c2ccccc2c1C(Nc1ccc(Cl)cc1)c1ncc[nH]1  
 C=C1C(=CC=C2CCCC3(C)C(C4(CCC(=O)C(C)C)O)CC4)=CCC23)CC(O)CC1O  
 CC(CCCNS(N) (=O)=O)C1CCC2C(=CC=C3CC(O)CC(O)C3)CCCC21C  
 CCC(CC) (c1ccc(OCC(=O)C(C)C)C(C)C)c(C)c1c1ccc(C(=O)NCC(=O)O)n1C  
 C=C1C(=CC=C2CCCC3(C)C2CCC3C(C)CC2CC(C)(O)C(=O)N2CCCc2cc(OCC)cc(OCC)c2)CC(O)CC1O  
 C=C1C(=CC=C2CCCC3(C)C2CCC3C(C)CC2CC(C)(O)C(=O)N2Cc2cc(OCC)cc(OCC)c2)CC(O)CC1O  
 C=C1C(O)CC(=CC=C2CCCC3(C)C2CCC3C(C)C(C)CCC(C)(C)O)CC1O  
 C=C1C(O)CC(=CC=C2CCCC3(C)C2CCC3C(C)CC#CC(O)C23CC4CC(CC(C4)C2)C3)CC1O  
 CC(CCCNS(C) (=O)=O)C1CCC2C(=CC=C3CC(O)CC(O)C3)CCCC21C  
 C=C1C(=CC=C2CCCC3(C)C2CCC3C(C)CC2CC(C)(O)C(=O)N2Cc2cc(OCCCC)cc(OCCCC)c2)CC(O)CC1O  
 COc1ccc(NC(c2ccc(OCC(F)F)cc2)c2c(C)[nH]c3ccccc23)cc1OC  
 Cc1[nH]c2ccccc2c1C(Nc1ccccc1)c1ccc(Cl)cc1  
 C=C1C(=CC=C2CCCC3(C)C2CCC3C(C)CC2OC(=O)C(=C)C2CCCC)CC(O)C(OCCCC)C1O  
 C=C1C(O)CC(=CC=C2CCCC3(C)C2CCC3C(C)CCCC(C)C)O)CC1O  
 CCC(CC) (c1ccc(OCC(O)C(C)C)C(C)C)c(C)c1c1ccc(C(=O)NCCO)n1C  
 C=C1C(=CC=C2CCCC3(C)C2CCC3C(C)CCCC(C)C)CC(O)CC1O  
 CC(=O)N1CCN(C(=O)Cn2c(-c3ccc(Cl)cc3)csc2=N)CC1  
 C=C1C(=CC=C2CCCC3(C)C2CCC3C(C)C(C)CCC(C)C)O)CC(O)CC1O

C=C1C(=CC=C2CCCC3(C)C2CCC3C(C)CC)CC(=O)C(=O)C1O  
COc1ccc(NC(c2ccccc2Cl)c2c(C)[nH]c3ccccc23)cc1  
C=C(COCC(C)C1CCC2C(=CC=C3CC(O)CC(O)C3=C)CCCC21C)C1=CCCC1(C)C  
C=C1C(=CC=C2CCCC3(C)C2CCC3C(C)CC2CC(C)(O)C(=O)N2Cc2cc(O)CC)c(O)CC1O  
C=C1C(=CC=C2CCCC3(C)C2CCC3C(C)CC2CC(C)(O)C(=O)N2Cc2cc(O)CC)c(O)c2)CC(O)CC1O  
CCC(=CC=CC(O)(C(F)(F)F)C(F)(F)F)c1cccc(Cc2ccc(O)c(O)c2)c1  
CCC(CC)(c1ccc(OCC(O)C(C)C)c(C)c1)c1ccc(OCC(O)CCO)c(C)c1  
Cc1ccc2c(C(NC3ccccc3)c3ccccc3Cl)c(C)[nH]c2c1  
CC(C)CC(N)C(=O)NC(CC(C)C)C(=O)NC1CCOC(O)C(O)C(O)C(O)C(=O)NC(=O)C(CC(C)C)NC(=O)C(CC(C)C)NC(=O)C(C)(C)NC1=O  
CCOC1C(O)CC(=CC=C2CCCC3(C)C(C(C)SCCC(O)(CC)CC)=CCC23)CC1O  
C=C1C(=CC=C2CCCC3(C)C2CCC3C(C)CC2OC(=O)C(=C)C2CC(C)C)CC(O)C(CCCO)C1O  
CCC(O)(CC)CSC(C)C1=CC2C(=CC=C3CC(O)C(C)(O)C(O)C3)CCCC12C  
Nc1nc2ccc(S(=O)(=O)N3CCCC3)cc2s1

### S4.5.2 Testing set

The SMILES strings of the recreated VDR ligands are highlighted in yellow.

C=C1C(O)CC(=CC=C2CCCC3(C)C2CCC3C(C)CCCC(C)O)CC1O  
C=C1C(=CC=C2CCCC3(C)C2CCC3C(C)CCCC(C)(C)O)CC(O)C(CcN2ncnm2)C1O  
C=C1C(=CC=C2CCCC3(C)C2CCC3C(C)CCCC(C)(C)O)CC(O)CC1O  
C=C1C(O)CC(=CC=C2CCCC3(C)C2CCC3C(C)CCCC(C)(C)O)CC1O  
C=C1C(O)CC(=CC=C2CCCC3(C)C2CCC3C(C)C(C)(C)CCC(C)(C)O)CC1O  
CCC(O)(CC)CSC(C)C1=CC2C(=CC=C3CC(O)C(O)C3)CCCC12C  
CCC(O)(CC)CSC(C)C1=CC2C(=CC=C3CC(O)C(=CO)C(O)C3)CCCC12C  
C=C1C(O)CC(=CC=C2CCCC3(C)C2CCC3C(C)CCC(O)(CC)CC)CC1O  
CCC(CC)(c1ccc(OCC(O)CO)c(C)c1)c1ccc(OCC(O)C(C)(C)C)c(C)c1  
C=C1C(=CC=C2CCCC3(C)C2CCC3C(C)CCCC(C)(C)O)CC(O)C(CcN2ncnm2)C1O  
CC(O)CCC(C)(C)O)C1CCC2C(=CC=C3CC(O)C(=CCF)C(O)C3)CCCC21C  
C=C1C(=CC=C2CCCC3(C)C2CCC3C(C)COc2ccc(C(C)(C)O)cc2)CC(O)CC1O  
C=C1C(=CC=C2CCCC3(C)C2CCC3C(C)CSc2ccc(C(C)(C)O)cc2)CC(O)CC1O  
CCOC1C(O)CC(=CC=C2CCCC3(C)C(C(C)SCCC(O)(CC)CC)=CCC23)CC1O  
C=C1C(O)CC(=CC=C2CCCC3(C)C2CCC3C(C)OCC(C)C(C)(C)O)CC1O  
C=C1C(O)CC(=CC=C2CCCC3(C)C2CCC3C(C)C(CCCC)CC(C)(C)O)CC1O  
C=C1C(=CC=C2CCCC3(C)C2CCC3C(C)CCCC(C)(C)O)CC(O)C(CcN2cncn2)C1O  
C=C1C(=CC=C2CCCC3(C)C2CCC3C(C)CCCC(C)(C)O)CC(O)C(CcN2ccnm2)C1O  
C=C1C(O)CC(=CC=C2CCCC3(C)C2CCC3C(C)C(CCO)CCCC)CC1O  
C=C1C(O)CC(=CC=C2CCCC3(C)C2CCC3C(C)C(CCCC)CCC(C)(C)O)CC1O  
C=C1C(=CC=C2CCCC3(C)C2CCC3C(C)(C)CC)CC(O)C(=CCO)C1O  
C=C1C(=CC=C2CCCC3(C)C2CCC3C(C)C=CC(O)C2CC2)CC(O)CC1O  
C=C1C(=CC=C2CCCC3(C)C2CCC3C(C)C=CC(O)C2(C(=O)O)CC2)CC(O)CC1O  
CCCc1cc(C(O)(CC)CC)ccc1-c1cc(Cc2ccc(O)c(O)c2)ccc1C  
CC(O)CCC(C)(C)O)C1CCC2C(=CC=C3CC(O)CC(O)C3=O)CCCC21C  
C=C1C(=CC=C2CCCC3(C)C2CCC3C(C)CCCC(C)(C)O)CC(O)C(CcN2ccnc2)C1O  
C=C1CC(CC(C)C)C2CCC3C(=CC=C4CC(O)C(=C)C(O)C4)CCCC32C)OC1=O  
C=C1C(O)CC(=CC=C2CCCC3(C)C2CCC3C(C)CC#CC(O)CC23CC4CC(CC(C4)C2)C3)CC1O  
CcN1c(C(=O)NC(C)CO)ccc1C(CC)(CC)c1ccc(OCC(O)C(C)(C)C)c(C)c1  
CCC(CC)(c1ccc(OCC(O)CO)c(C)c1)c1ccc(OCC(O)C(C)(C)C)c(C)c1  
C=C1C(O)CC(=CC=C2CCCC3(C)C2CCC3C(C)C(CC)CC(C)(C)O)CC1O  
C=C1C(O)CC(=CC=CCC(C)(C)CC(C)CCCC(C)(C)O)CC1O  
C=C1C(O)CC(=CC=C2CCCC3(C)C2CCC3C(C)C(CC)CCC(C)(C)O)CC1O  
C=C1C(O)CC(=CC=C2CCCC3(C)C2CCC3C(C)C(CC)CCO)CC1O  
C=C1C(O)CC(=CC=C2CCCC3(C)C2CCC3C(C)C=CCC(O)CC23CC4CC(CC(C4)C2)C3)CC1O  
CCC(=CC=CC(O)(C(F)(F)F)C(F)(F)F)c1cccc(O)C2ccc(O)c(O)c2)c1



CC0c1ccc(C=CC2=[N+](C)c3ccc(C(=O)OC)cc3C2(C)C)cc1  
 CC(C)CS(=O)(=O)c1oc(-c2cccs2)nc1S(=O)(=O)c1ccc(F)cc1  
 COC(=O)c1ccc2c(c1)C(C)(C)C(C=Cc1ccc(O)cc1)=[N+]2C  
 CCC(CC)(c1ccc(OCC(O)CO)c(C)c1)c1ccc(OCC(O)C(C)(C)CCc2ccccc2)c(C)c1  
 CS(=O)(=O)c1ccc(C(=O)NCCCC(=O)N2CCN(c3ccc(C(F)(F)F)cc3)CC2)cc1[N+](=O)[O-]  
 COc1ccc2c(C(Nc3ccc(Cl)cc3)c3ccccc3Cl)c(C)[nH]c2c1  
 Cc1ccc(NC(c2ccccc2Cl)c2c(C)[nH]c3ccccc23)cc1  
 COC(=O)c1ccc(C=CC2=[N+](C)c3ccc(OC)cc3C2(C)C)cc1  
**Cc1[nH]c2ccccc2c1C(Nc1ccccc1)c1ccccc1Cl**  
 COc1ccc(NC(c2nccs2)c2c(C)[nH]c3ccccc23)cc1OC  
 Cc1[nH]c2ccccc2c1C(Nc1ccccc1)c1ccc(C(C)C)cc1  
 Cc1ccc2c(C(NC3ccc(C(F)(F)F)cc3)c3ccccc3Cl)c(C)[nH]c2c1

### S4.5.3 Seeds

C=C1C(=CC=C2CCCC3(C)C2CCC3C(C)CCC(O)C(C)C)CC(O)CC1O  
 C=C1C(=CC=C2CCC(C)CCC(C)C(C)O)C3(C)C2CCC3C(C)CCO)CC(O)CC1O  
 CCC(=CC=CC(O)(CC)CC)c1cccc(OCc2ccc(CO)c(CO)c2)c1  
 C=C1C(=CC=C2CCCC3(C)C2CCC3C(C)COC(=C)C(C)(C)C)CC(O)CC1O  
 C=C1C(=CC=C2CCCC3(C)C2CCC3C(C)CC2OC(=O)C(=C)C2CCC)CC(O)C(OCCCC)C1O  
 Cc1ccc(CNC(c2ccccc2Cl)c2c(C)[nH]c3cc(C)ccc23)cc1  
 CCC(CC)(c1ccc(OCC(=O)C(C)(C)C)c(C)c1)c1ccc(OCC(=O)C(C)(C)C)c(C)c1  
 C=C1C(=CC=C2CCCC3(C)C(C4(CCCC(C)(C)O)CC4)=CCC23)CC(O)CC1O  
 COc1ccc(NC(c2ccccc2Cl)c2c(C)[nH]c3cc(C)ccc23)cc1OC  
 C=C1C(O)CC(=CC=C2CCCC3(C)C2CCC3C(C)C(CCCC)CC(O)(CC)CC)CC1O  
 Cc1ccc2c(C(Nc3ccnc3)c3ccccc3Cl)c(C)[nH]c2c1  
 Cc1ccc(-c2csc(=N)n2CC(=O)N2CCN(c3ccccc3)CC2)cc1  
 C=C1C(=CC=C2CCCC3(C)C2CCC3C(C)CC2OC(=O)C(=C)C2CCCC)CC(O)C(OCCCC)C1O  
 C=C1C(=CC=C2CCCC3(C)C2CCC3C(C)C(CCCC)CC(O)C(C)C)CC(O)CC1O  
 CC(OCCC(=O)Nc1ccccc1N)C1CCC2C(=CC=C3CC(O)CC(O)C3)CCCC21C  
 COc1ccc(C(Nc2ccc(C(F)(F)F)cc2)c2c(C)[nH]c3ccccc23)cc1  
 C=C1C(=CC=C2CCCC3(C)C2CCC3C(C)C(CCCC)CCC(C)(C)O)CC(O)CC1O  
 C=C1C(=CC=C2CCCC3(C)C2CCC3C(C)CC2CC(C)(O)C(=O)N2Cc2cc(OC)cc(OC)c2)CC(O)CC1O  
 C=C1C(O)CC(=CC=C2CCCC3(C)C2CCC3C(C)CCCC(C)(O)CC1O  
 C=C1C(=O)OC(CC(C)C)C2CCC3C(=CC=C4CC(O)C(OCCCC)C(O)C4=C)CCCC32C)C1C  
 CC(C)CC(N)C(=O)NC(CC(C)C)C(=O)NC1CCOC(C)C(O)C(OCCC(C(=O)O)NC(=O)C(CC(C)C)NC(=O)C(C)(C)NC(=O)C(C)C)NC1=O  
 CCC(CC)(c1ccc(OCC(O)C(C)(C)C)c(C)c1)c1ccc(OC(CO)CO)c(C)c1  
 C=C1C(=CC=C2CCCC3(C)C2CCC3C(C)CCCC(C)(O)CC(O)C2=CCOC12  
 Cc1[nH]c2ccccc2c1C(Nc1ccc(N(C)C)cc1)c1ccccc1Cl  
 C=C1C(=CC=C2CCCC3(C)C2CCC3C(C)COC#CC(C)(C)C)CC(O)CC1O  
 CCC(CC)(c1ccc(OCC(O)C(C)(C)C)c(C)c1)c1ccc(C(=O)NCCCC)n1C  
 CCn1c(C(=O)NC(CO)CO)ccc1C(CC)(CC)c1ccc(OCC(O)C(C)(C)C)c(C)c1  
 C=C1C(O)CC(=CC=C2CCCC3(C)C(CCCC(C)(C)O)CCC23)CC1O  
 C=C1C(=CC=C2CCCC3(C)C2CCC3C(C)CCCC(C)(O)CC(O)C(Cc2cnm2)C1O  
 CCCOC1C(O)CC(=CC=C2CCCC3(C)C(C(C)SCCC(O)(CC)CC)=CCC23)CC1O

## S4.6 Sample 6

### S4.6.1 Training set

C=C1C(O)CC(=CC=C2CCCC3(C)C2CCC3C(C)C(C)C)CC(O)CC1O  
 CCS(=O)(=O)c1oc(-c2cccs2)nc1S(=O)(=O)c1ccccc1  
 Cc1ccc2c(C(Nc3ccc(Cl)cc3)c3ccccc3Cl)c(C)[nH]c2c1  
 CCn1c(C(=O)NC(C)C(=O)O)ccc1C(CC)(CC)c1ccc(OCC(O)C(C)(C)C)c(C)c1  
 C=C1C(=CC=C2CCCC3(C)C2CCC3C(C)CC2OC(=O)C(=C)C2CCCC)CC(O)C(OCCCC)C1O  
 CCC(CC)(c1ccc(OCC(O)CO)c(C)c1)c1ccc(OCC(O)C(C)(C)C)c(C)c1



Cc1ccc2c(C(Nc3ccc(C(F)(F)F)cc3)c3ccccc3C1)c(C)[nH]c2c1  
C=C1C(=CC=C2CCCC3(C)C2CCC3C(C)CCCC(C)(C)O)CC(O)CC1C(F)F  
CCC(=CC=CC(O)(C(F)(F)F)C(F)(F)F)c1cccc(OCc2ccc(CO)c(CO)c2)c1  
C=C1C(=CC=C2CCCC3(C)C2CCC3C(C)CC2OC(=O)C(=C)C2CC(C)C)CC(O)C(C)C1O  
C=C1C(O)CC(=CC=C2CCCC3(C)C2CCC3C(C)C=CCC(O)C23CC4CC(CC(C4)C2)C3)CC1O  
CC(CCCC(C)(C)O)C1CCC2C(=CC=C3CC(O)C(=CCF)C(O)C3)CCCC21C  
CCn1c(C(=O)NCCO)ccc1C(CC)(CC)c1ccc(OC(O)C(C)(C)c(C)c1  
C=C1C(O)CC(=CC=CCC(C)(C)CC(C)CCCC(C)(C)O)CC1O  
Cc1[nH]c2cccc2c1C(Nc1cccc1)c1cccc1C1  
CCC(CC)(c1ccc(OC(=O)C(C)(C)C)c(C)c1)c1ccc(C(=O)NCC(=O)OC)n1C  
C=C1C(=CC=C2CCCC3(C)C2CCC3C(C)CC2OC(=O)C(=C)C2CC)CC(O)C(CCCO)C1O  
CCC(O)(CC)CSC(C)C1=CCC2C(=CC=C3CC(O)C(C)(O)C(O)C3)CCCC12C  
CCCc1cc(C(O)(CC)CC)ccc1-c1cc(CCc2ccc(CO)c(CO)c2)ccc1C  
CC(CCCCC(=O)Nc1cccc1N)C1CCC2C(=CC=C3CC(O)CC(O)C3)CCCC21C  
COc1ccc2c(C(Nc3ccc(C1)cc3)c3ccccc3C1)c(C)[nH]c2c1  
CCOc1ccc(C=CC2=[N+](C)c3ccc(C(=O)OC)cc3C2(C)C)cc1  
C=C1C(O)CC(=CC=C2CCCC3(C)C2CCC3C(C)C(CCCC)CCC(C)(C)O)CC1O  
C=C1C(=CC=C2CCCC3(C)C2CCC3C(C)CC2CC(C)(O)C(=O)N2CCCCc2cccc2)CC(O)CC1O  
CCC(CC)(c1ccc(OC(=O)C(C)(C)C)c(C)c1)c1ccc(C(=O)NC(CC(=O)O)C(=O)O)n1C  
C=C1C(=CC=C2CCCC3(C)C2CCC3C(C)C=CC(O)C2(C=CC(=O)OC)CC2)CC(O)CC1O  
C=C1C(=CC=C2CCCC3(C)C(C4(CCC(=O)C(C)(C)O)CC4)CCC23)CC(O)CC1O  
C=C1C(=CC=C2CCCC3(C)C2CCC3C(C)CC2OC(=O)C(=C)C2CC(C)C)CC(O)C(CCCO)C1O  
CC(CCCNS(=O)(=O)C(F)(F)F)C1CCC2C(=CC=C3CC(O)CC(O)C3)CCCC21C  
Nc1nc2ccc(S(=O)(=O)N3CCCC3)cc2s1  
Cc1[nH]c2cccc2c1C(Nc1ccc(C1)cc1)c1ncc[nH]1  
C=C1C(=CC=C2CCCC3(C)C2CCC3C(C)CC2OC(=O)C(=C)C2CCC)CC(O)C(OC(O)C)C1O  
C=C1C(O)CC(=CC=C2CCCC3(C)C2CCC3C(C)C(CCCC)CCO)CC1O  
C=C1C(O)CC(=CC=C2CCCC3(C)C2CCC3C(C)C(C)CCC(C)(C)O)CC1O  
CC(CCCNS(=O)(=O)c1cccc1)C1CCC2C(=CC=C3CC(O)CC(O)C3)CCCC21C  
C=C1C(=CC=C2CCCC3(C)C2CCC3C(C)CC2OC(=O)C(=C)C2CCCC)CC(O)CC1O  
C=C1C(=CC=C2CCCC3(C)C2CCC3C(C)CC2OC(=O)C(=O)N2Cc2cc(OC)cc(OC)c2)CC(O)CC1O  
CCn1c(C(=O)NCC(=O)OC)ccc1C(CC)(CC)c1ccc(OC(=O)C(C)(C)c(C)c1  
CC(CCCNS(N)(=O)=O)C1CCC2C(=CC=C3CC(O)CC(O)C3)CCCC21C  
CCC(CC)(c1ccc(OC(O)C(C)(C)C)c(C)c1)c1ccc(C(=O)NC(C)CO)n1C  
CCC(CC)(c1ccc(OC(=O)C(C)(C)C)c(C)c1)c1ccc(OC(=O)C(C)(C)C)c(C)c1  
C=C1C(=CC=C2CCCC3(C)C2CCC3C(C)CC2CC(C)(O)C(=O)N2C)CC(O)CC1O  
C=C1C(=CC=C2CCC(C)CCCC(C)(C)O)C3(C)C2CCC3C(C)CCO)CC(O)CC1O  
C=C1CC(CC(C)C)C2CCC3C(=CC=C4CC(O)C(=C)C(O)C4)CCCC32C)OC1=O  
CC(CCCCC(=O)NO)C1CCC2C(=CC=C3CC(O)CC(O)C3)CCCC21C  
CCC(CC)(c1ccc(OC(O)C(C)(C)C)c(C)c1)c1ccc(OC(CO)CCO)c(C)c1  
C=C1C(=CC=C2CCCC3(C)C(C(C)CCCC(C)(C)O)CCC23C)CC(O)CC1O  
COc1ccc(NC(c2cccc2C1)c2c(C)[nH]c3cccc23)cc1OC  
C=C1C(=CC=C2CCCC3(C)C2CCC3C(C)COC#CC(C)(C)C)CC(O)CC1O  
C=C1C(O)CC(=CC=CCCC(C)CCCC(C)(C)O)CC1O  
C=C1C(=CC=C2CCCC3(C)C2CCC3C(C)C=CC(O)C2(C(=O)OCCCC)CC2)CC(O)CC1O  
C=C1C(O)CC(=CC=C2CCCC3(C)C(C)CCCC(C)(C)O)CCC23)CC1O  
C=C1C(=CC=C2CCCC3(C)C2CCC3C(C)CC2OC(=O)C(=C)C2CCC)CC(O)C(C)C1O  
CC(CCCC(C)(C)O)C1CCC2C(=CC=C3CC(O)C4=CCCC4C3)CCCC21C  
C=C1C(O)CC(=CC=C2CCCC3(C)C2CCC3C(C)C=CCC(O)CC23CC4CC(CC(C4)C2)C3)CC1O  
COc1cccc1NC(c1cccc1C1)c1c(C)[nH]c2cccc12  
COc1ccc(NC(c2cccc2C1)c2c(C)[nH]c3cccc23)cc1  
C=C1C(=CC=C2CCCC3(C)C2CCC3C(C)CC2OC(=O)C(=C)C2CC)CC(O)C(OC(O)C)C1O  
C=C1C(=CC=C2CCCC3(C)C2CCC3C(C)COCc2cccc2)CC(O)CC1O  
C=C1C(=CC=C2CCCC3(C)C2CCC3C(C)CC2OC(=O)C(=C)C2(C)C)CC(O)CC1O  
C=C1C(=CC=C2CCCC3(C)C2CCC3C(C)OCCC(O)(CC)CC)CC(O)CC1C(F)F  
CC(CCCNS(C)(=O)=O)C1CCC2C(=CC=C3CC(O)CC(O)C3)CCCC21C  
C=C1C(=CC=C2CCCC3(C)C2CCC3C(C)CC2CC(C)(O)C(=O)N2Cc2cc(OC)cc(OC)c2)CC(O)CC1O  
C=C1C(O)CC(=CC=C2CCCC3(C)C2CCC3C(C)C(CCCC)CC(O)(CC)CC)CC1O  
CC(C)CS(=O)(=O)c1oc(-c2cccs2)nc1S(=O)(=O)c1ccc(F)cc1

CC(CCCC(C)(C)O)C1CCC2C(=CC=C3CC(O)C(=CCO)C(O)C3)CCCC21C  
CC(OCC(=O)O)C1CCC2C3CCC4CC(O)CCC4(C)C3CCC12C  
COc1ccc(C(Nc2ccc(C(F)(F)F)cc2)c2c(C)[nH]c3ccccc23)cc1  
C=C1C(=CC=C2CCCC3(C)C2CCC3C(C)CCCC(C)(C)O)CC(O)C(Cc2n2ccnc2)C1O  
Cc1ccc(NC(c2ccccc2Cl)c2c(C)[nH]c3ccccc23)cc1  
Cc1ccc2c(C(NCc3ccc(C(F)(F)F)cc3)c3ccccc3Cl)c(C)[nH]c2c1  
CCC(CC)(c1ccc(OCC(O)C(C)(C)C)c(C)c1)c1ccc(C(=O)NCC(=O)O)n1C  
Cc1ccc(-c2csc(=N)n2CC(=O)N2CCN(c3ccccc3)CC2)cc1  
CCCCS(=O)(=O)NCCCC(C)C1CCC2C(=CC=C3CC(O)CC(O)C3)CCCC21C  
C=C1C(=CC=C2CCCC3(C)C2CCC3C(C)C)CC(C)CC(O)C(=CCO)C1O  
CC(=O)N1CCN(C(=O)Cn2c(-c3ccc(Cl)cc3)csc2=N)CC1  
C=C1C(=O)OC(C(C)C)C2CCC3C(=CC=C4CC(O)C(O)C4=C)CCCC32C)C1C  
CC(C)S(=O)(=O)c1oc(-c2cccs2)nc1S(=O)(=O)c1ccccc1  
C=C1C(O)CC(=CC=C2CCCC3(C)C2CCC3C(C)C(C)CCC(C)(C)O)CC1O  
C=C1C(=CC=C2CCCC3(C)C2CCC3C(C)CC2OC(=O)C(=C)C2CCC)CC(O)CC1O  
C=C1C(=CC=C2CCCC3(C)C2CCC3C(C)CC2CC(C)(O)C(=O)N2CCc2cc(OC)cc(OC)c2)CC(O)CC1O  
C=C1C(=CC=C2CCCC3(C)C2CCC3C(C)CC2CC(C)(O)C(=O)N2Cc2ccc(OC)cc2)CC(O)CC1O  
CO(C(=O)c1ccc2c(c1)C(C)(C)C(C=Cc1ccc(O)cc1)=[N+]2C  
C=C1C(=CC=C2CCCC3(C)C2CCC3C(C)CC2CC(C)(O)C(=O)N2Cc2ccccc2)CC(O)CC1O  
C=C1C(O)CC(=CC=C2CCCC3(C)C2CCC3C(C)C(CCCC)CC(C)(C)O)CC1O  
Cc1[nH]c2ccccc2c1C(NC1c1ccccc1)c1ccccc1Cl  
C=C1C(=CC=C2CCCC3(C)C2CCC3C(C)C(CCCC)CC(O)C(C)C)CC(O)CC1O  
CCC(=CC=CC(O)(C(F)(F)F)C(F)(F)F)c1cccc(Cc2ccc(CO)c(CO)c2)c1  
C=C1C(=CC=C2CCCC3(C)C2CCC3C(C)C(CCO)CCCC)CC(O)CC1O  
Cc1ccc2c(C(Nc3ccc(OC(F)(F)F)cc3)c3ccccc3Cl)c(C)[nH]c2c1  
CO(C(=O)c1ccc(C=CC2=[N+](C)c3ccc(OC)cc3C2(C)C)cc1  
C=C1C(=CC=C2CCCC3(C)C2CCC3C(C)CCCC(C)(C)O)CC(O)C(Cc2n2ccnm2)C1O  
C=C1C(=CC=C2CCCC3(C)C2CCC3C(C)CC2CC(C)(O)C(=O)N2CCc2cc(OC)cc(OC)c2)CC(O)CC1O  
C=C1C(=CC=C2CCCC3(C)C2CCC3C(C)CC2CC(C)(O)C(=O)N2Cc2cc(OC)cc(OC)c2)CC(O)CC1O  
C=C1C(=CC=C2CCCC3(C)C2CCC3C(C)CCCC(C)(C)O)CC(O)C(Cc2n2cnm2)C1O  
CCC(CC)(c1ccc(OCC(O)C(C)(C)C)c(C)c1)c1ccc(C(=O)NCCC(=O)O)n1C  
COc1ncccc1NC(c1ccccc1)c1c(C)[nH]c2cc(C)ccc12  
CC(=O)N1CCN(C(=O)Cn2c(-c3ccc(C)cc3)csc2=N)CC1  
C=C1C(=CC=C2CCCC3(C)C2CCC3C(C)CC2CC(C)(O)C(=O)N2CCc2ccccc2)CC(O)CC1O  
CC(O)CCCC(C)C1CCC2C(=CC=C3CC(O)C(C)C(O)C3)CCCC21C

#### S4.6.2 Testing set

The SMILES strings of the recreated VDR ligands are highlighted in yellow.

C=C1C(O)CC(=CC=C2CCCC3(C)C2CCC3C(C)CCCC(C)O)CC1O  
C=C1C(=CC=C2CCCC3(C)C2CCC3C(C)CCCC(C)(C)O)CC(O)C(Cc2n2ccnm2)C1O  
C=C1C(=CC=C2CCCC3(C)C2CCC3C(C)CCCC(C)(C)O)CC(O)CC1O  
C=C1C(=CC=C2CCCC3(C)C2CCC3C(C)C(C)CC(C)(C)O)CC1O  
C=C1C(O)CC(=CC=C2CCCC3C2CCC3C(C)CCCC(C)(C)O)CC1O  
C=C1C(O)CC(=CC=C2CCCC3(C)C2CCC3C(C)C=CC(O)C23CC4CC(CC(C4)C2)C3)CC1O  
C=C1C(O)CC(=CC=C2CCCC3(C)C2CCC3C(C)C(C)(C)CCC(C)(C)O)CC1O  
CCC(O)(CC)CSC(C)C1=CCC2C(=CC=C3CC(O)C(O)C3)CCCC12C  
CCC(O)(CC)CSC(C)C1=CCC2C(=CC=C3CC(O)C(=CCO)C(O)C3)CCCC12C  
C=C1C(O)CC(=CC=C2CCCC3(C)C2CCC3C(C)CCC(O)(CC)CC)CC1O  
CCCCO1C(O)CC(=CC=C2CCCC3(C)C(C(C)S)CC(O)(CC)CC)=CCC23)CC1O  
C=C1C(=CC=C2CCCC3(C)C2CCC3C(C)C(C)CCC(C)(C)O)CC(O)CC1O  
CCC(CC)(c1ccc(OCC(O)CO)c(C)c1)c1ccc(OCC(O)C(C)(C)C)c(C)c1  
C=C1C(=CC=C2CCCC3(C)C2CCC3C(C)CCCC(C)(C)O)CC(O)C(Cc2n2ccnc2)C1O  
C=C1C(O)CC(=CC=C2CCCC3C(C)CCCC(C)(C)O)CCC23)CC1O  
C=C1C(O)CC(=CC=C2CCCC3(C)C2CCC3C(C)CC#CC(O)C23CC4CC(CC(C4)C2)C3)CC1O  
C=C1C(=CC=C2CCCC3(C)C2CCC3C(C)COc2ccc(C(C)(C)O)cc2)CC(O)CC1O  
C=C1C(=CC=C2CCCC3(C)C2CCC3C(C)CSc2ccc(C(C)(C)O)cc2)CC(O)CC1O

CCCOC1C(O)CC(=CC=C2CCCC3(C)C(C(C)SCCCC(O)(CC)CC)=CCC23)CC1O  
 C=C1C(O)CC(=CC=C2CCCC3(C)C2CCC3C(C)CCCC(C)(C)O)CC1O  
 C=C1C(O)CC(=CC=C2CCCC3(C)C2CCC3C(C)OCC(C)C(C)(C)O)CC1O  
 C=C1C(=CC=C2CCCC3(C)C2CCC3C(C)CCCC(C)(C)O)CC(O)C(Cn2cn2)C1O  
 C=C1C(=CC=C2CCCC3(C)C2CCC3C(C)C(CCCC)CCC(C)(C)O)CC(O)CC1O  
 C=C1C(=CC=C2CCCC3(C)C2CCC3C(C)CCCC(C)(C)O)CC(O)C2=CCOC12  
 C=C1CCC(O)CC1=CC=C1CCCC2(C)C1CCC2C(C)CCCC(C)C  
 C=C1C(O)CC(=CC=C2CCCC3(C)C2CCC3C(C)C(CCO)CCCC)CC1O  
 C=C1C(=CC=C2CCCC3(C)C2CCC3C(C)CC)CC(O)C(=CCO)C1O  
 C=C1C(=CC=C2CCCC3(C)C2CCC3C(C)C=CC(O)C2CC2)CC(O)CC1O  
 C=C1C(O)CC(=CC=C2CCCC3(C)C2CCC3C(C)C(C)CC(O)(CC)CC)CC1O  
 C=C1C(=CC=C2CCCC3(C)C2CCC3C(C)CC(C)C)CC(O)C(=CCO)C1O  
 CC(OCCC(C)(C)O)C1CCC2C(=CC=C3CC(O)CC(O)C3=O)CCCC21C  
 C=C1C(=CC=C2CCCC3(C)C(C4(CCCC(C)(C)O)CC4)=CCC23)CC(O)CC1O  
 C=C1C(O)CC(=CC=C2CCCC3(C)C2CCC3C(C)CC#CC(O)CC23CC4CC(C(C4)C2)C3)CC1O  
 CCC(CC)(c1ccc(OCC(O)C(C)(C)C)c(C)c1)c1ccc(OCC(O)C(O)C)c(C)c1  
 CCn1c(C(=O)NC(C)CO)ccc1C(CC)(CC)c1ccc(OCC(O)C(C)(C)C)c(C)c1  
 CCCc1cc(C(O)(CC)CC)ccc1-c1cc(OCC2ccc(CO)c(CO)c2)ccc1CC  
 C=C1C(O)CC(=CC=C2CCCC3(C)C2CCC3C(C)C(C)CCO)CC1O  
 C=C1C(O)CC(=CC=CCC(C)CC(C)CCCC(C)(C)O)CC1O  
 C=C1C(=CC=C2CCC(C)CCCC(C)(C)O)C3(C)C2CCC3C(C)CCO)CC(O)CC1O  
 C=C1CC(CC(C)C)C2CCC3C(=CC=C4CC(O)CC(O)C4=C)CCCC32C)OC1=O  
 C=C1C(=CC=C2CCCC3(C)C2CCC3C(C)CC2OC(=O)C(=C)C23CCCC3)CC(O)CC1O  
 C=C1C(=O)OC(CC(C)C)C2CCC3C(=CC=C4CC(O)C(CCCO)C(O)C4=C)CCCC32C)C1C  
 C=C1C(=CC=C2CCCC3(C)C2CCC3C(C)CC2OC(=O)C(=C)C2CCC)CC(O)C(CCCO)C1O  
 C=C1C(=CC=C2CCCC3(C)C2CCC3C(C)CC2OC(=O)C(=C)C2CCC)CC(O)C(C)C1O  
 C=C1C(=CC=C2CCCC3(C)C2CCC3C(C)CC2OC(=O)C(=C)C2CC)CC(O)C(C)C1O  
 C=C1C(=O)OC(CC(C)C)C2CCC3C(=CC=C4CC(O)C(C)C(O)C4=C)CCCC32C)C1C  
 C=C1C(=CC=C2CCCC3(C)C2CCC3C(C)CCC(O)C(C)C)CC(O)CC1O  
 C=C1C(O)CC(=CC=C2CCCC3(C)C2CCC3C(C)C(C)CCO)CC1O  
 C=C1C(=CC=C2CCCC3(C)C2CCC3C(C)CC2OC(=O)C(=C)C2C)CC(O)CC1O  
 C=C1C(=CC=C2CCC(C)CCCC(C)(C)O)C3(C)C2CCC3C(C)CO)CC(O)CC1O  
 C=C1C(=CC=C2CCCC3(C)C2CCC3C(C)CC2OC(=O)C(=C)C2CC)CC(O)CC1O  
 C=C1C(=CC=C2CCCC3(C)C2CCC3C(C)CC2OC(=O)C(=C)C2CCCC)CC(O)C(CCCO)C1O  
 C=C1C(=CC=C2CCCC3(C)C2CCC3C(C)CC2OC(=O)C(=C)C2CC(C)C)CC(O)CC1O  
 C=C1C(=CC=C2CCCC3(C)C2CCC3C(C)CC2OC(=O)C(=C)C2CC(C)C)CC(O)C(OCCC)C1O  
 C=C1C(=CC=C2CCCC3(C)C2CCC3C(C)CCCC(C)(C)C)CC(O)CC1O  
 CCC(CC)(c1ccc(OCC(O)C(C)(C)C)c(C)c1)c1ccc(OCC(O)CCO)c(C)c1  
 CC(OCCNC(=O)CS)C1CCC2C(=CC=C3CC(O)CC(O)C3)CCCC21C  
 CC[Si](CC)(c1ccc(OCC(=O)C(C)(C)C)c(C)c1)c1ccc(OCC2CO2)c(C)c1  
 CCC(=CC=CC(O)(CC)CC)c1cccc(OCC2ccc(CO)c(CO)c2)c1  
 CC(C=CC(O)C12CC3CC(CC(C3)C1)C2)C1CCC2C(=CC=C3CC(O)CC(O)C3)CCCC21C  
 C=C1C(=CC=C2CCCC3(C)C(C(C)C)CCC(F)(F)C(O)(CC)CC)=CCC23)CC(O)CC1C(F)F  
 COCOCCC=C1C(O)CC(=CC=C2CCCC3(C)C2CCC3C(C)CCCC(C)(C)O)CC1O  
 C=C1C(=CC=C2CCCC3(C)C2CCC3C(C)CCCC(C)(C)O)CC2OCC=C2C1O  
 C=C1C(O)CC(=CC=CCC(C)=CC(C)CCCC(C)(C)O)CC1O  
 C=C1C(=CC=C2CCCC3(C)C2CCC3C(C)COCC(=C)C(C)(C)C)CC(O)CC1O  
 CC(C=CC(=O)NO)=CC(C)C1CCC2C(=CC=C3CC(O)CC(O)C3)CCCC21C  
 CCC(CC)(c1ccc(OCC(=O)C(C)(C)C)c(C)c1)c1ccc(OCC(O)CO)c(C)c1  
 CC(C=CC(=O)Nc1ccccc1N)=CC(C)C1CCC2C(=CC=C3CC(O)CC(O)C3)CCCC21C  
 CCn1c(C(=O)NC(CO)CO)ccc1C(CC)(CC)c1ccc(OCC(O)C(C)(C)C)c(C)c1  
 CCC(CC)(c1ccc(OCC(O)C(C)(C)C)c(C)c1)c1ccc(C(=O)NCCO)n1C  
 C=C1C(=CC=C2CCCC3(C)C2CCC3C(C)CC2CC(C)(O)C(=O)N2Cc2cc(OCCC)cc(OCCC)c2)CC(O)CC1O  
 CC(OCCCCNS(N)(=O)=O)C1CCC2C(=CC=C3CC(O)CC(O)C3)CCCC21C  
 C=C1C(=CC=C2CCCC3(C)C2CCC3C(C)COCC(=C)C2(C)CCCC2)CC(O)CC1O  
 CCC(CC)(c1ccc(OCC(O)C(C)(C)C)c(C)c1)c1ccc(C(=O)NC(CO)CCO)n1C  
 CC(OCCNS(C)(=O)=O)C1CCC2C(=CC=C3CC(O)CC(O)C3)CCCC21C  
 C=C(COCC(C)C1CCC2C(=CC=C3CC(O)CC(O)C3=C)CCCC21C)C1=CCCC1(C)C  
 CC(OCCC(=O)Nc1ccccc1N)C1CCC2C(=CC=C3CC(O)CC(O)C3)CCCC21C

Cc1ccc(NC(c2ccccc2Cl)c2c(C) [nH] c3ccccc23)cc1C  
 CCC(CC) (c1ccc(OCC(=O)C(C) (C)C)c(C) c1) c1ccc(C(=O)NCCC(=O)OC)n1C  
 CCCS(=O) (=O) c1oc(-c2cccs2)nc1S(=O) (=O) c1ccc(F) cc1  
 N=c1scc(-c2ccccc2)n1CC(=O)N1CCN(c2ccccc2)CC1  
 C=C1C(=CC=C2CCCC3(C)C2CC3C(C)CC2CC(C) (O)C(=O)N2CCCC2ccccc2)CC(O)CC10  
 COc1ccc(NC(c2ccc(OC(F) (F)F)cc2)c2c(C) [nH] c3ccccc23)cc1OC  
 CCC(CC) (c1ccc(OCC(=O)C(C) (C)C)c(C) c1) c1ccc(C(=O)NC(C)C(=O)O)n1C  
 N=c1scc(-c2ccc(Cl)cc2)n1CC(=O)N1CCN(c2ccccc2)CC1  
 Cc1 [nH] c2ccccc2c1C(Nc1ccc(Cl)cc1) c1ccnc1  
 CC(C)CC(N)C(=O)NC(CC(C)C)C(=O)NC1COC(C)C(=O)C(C)C(C)C(C)C(=O)NC(=O)C(C)C(C)NC(=O)C(C)C(C)NC(=O)C(C)C(C)NC1=O  
 COc1ccc(C(Nc2ccc(OC)c(OC)c2)c2c(C) [nH] c3ccccc23)cc1  
 COC(=O) c1ccc2c(c1)C(C) (C)C(C=Cc1ccc(OC)cc1)=[N+] 2C  
 Cc1ccc(CNC(c2ccccc2Cl)c2c(C) [nH] c3cc(C)ccc23)cc1  
 CCC(CC) (c1ccc(OCC(O)CO)c(C) c1) c1ccc(OCC(O)C(C) (C)CCc2ccccc2)c(C) c1  
 CN1CCN(C(=O)Cn2c(-c3ccc(Cl)cc3) csc2=N)CC1  
 Cc1 [nH] c2ccccc2c1C(Nc1ccc(Cl)cc1) c1ccncc1  
 Cc1 [nH] c2ccccc2c1C(Nc1ccc(Cl)cc1) c1nccs1  
 COc1ccc(C=CC2=[N+] (C) c3ccc(OC)cc3C2(C)C)cc1  
**Cc1 [nH] c2ccccc2c1C(Nc1ccc(Cl)cc1) c1ccccc1Cl**  
 N=c1scc(-c2ccc(Cl)cc2)n1CC(=O)N1CCOCC1  
 Cc1 [nH] c2ccccc2c1C(Nc1ccc([N+] (=O) [O-])cc1) c1ccccc1Cl  
 COc1ccc(NC(c2ccc(C(F) (F)F)cc2)c2c(C) [nH] c3ccccc23)cc1OC  
 CC(=O)N1CCN(C(=O)Cn2c(-c3ccccc3) csc2=N)CC1  
 Cc1ccc2c(C(NC3ccccc3) c3ccccc3Cl)c(C) [nH] c2c1  
 Cc1ccc2c(C(Nc3ccccc3) c3ccccc3Cl)c(C) [nH] c2c1  
 CCC(CC) (c1ccc(OCC(O)CO)c(C) c1) c1ccc(OCC(O)C(C) (C)CCc2ccccc2)c(C) c1  
 CS(=O) (=O) c1ccc(C(=O)NCCCC(=O)N2CCN(c3ccc(C(F) (F)F)cc3)CC2)cc1 [N+] (=O) [O-]  
 Cc1 [nH] c2ccccc2c1C(Nc1ccccc1) c1ccc(Cl)cc1  
 COc1ccc(NC(c2nccs2)c2c(C) [nH] c3ccccc23)cc1OC  
 Cc1 [nH] c2ccccc2c1C(Nc1ccc(N(C)C)cc1) c1ccccc1Cl  
 Cc1 [nH] c2ccccc2c1C(Nc1ccccc1) c1ccc(C(C)C)cc1  
 COc1ccc(NC(c2ccccc2Cl)c2c(C) [nH] c3cc(C)ccc23)cc1OC  
 COc1ccc(C(Nc2ccccc2)c2c(C) [nH] c3ccccc23)cc1

### S4.6.3 Seeds

C=C1C(O)CC(=CC=C2CCCC3(C)C2CC3C(C)C=CCC(O)CC23CC4CC(CC(C4)C2)C3)CC10  
 C=C1C(=CC=C2CCCC3(C)C2CC3C(C)COCc2ccccc2)CC(O)CC10  
 Cc1ccc2c(C(Nc3ccc(Cl)cc3) c3ccccc3Cl)c(C) [nH] c2c1  
 COc1nccccc1NC(c1ccccc1) c1c(C) [nH] c2cc(C)ccc12  
 Cc1ccc2c(C(Nc3ccc(OC(F) (F)F)cc3) c3ccccc3Cl)c(C) [nH] c2c1  
 C=C1C(=CC=C2CCC(CCCCC(C) (C)O)C3(C)C2CC3C(C)CCO)CC(O)CC10  
 C=C1C(=CC=C2CCCC3(C)C2CC3C(C)CC2OC(=O)C(=C)C2CCC)CC(O)CC10  
 Cc1ccc(-c2csc(=N)n2CC(=O)N2CCN(c3ccccc3)CC2)cc1  
 C=C1C(O)CC(=CC=C2CCCC3(C)C(CCCCC(C) (C)O)CCC23)CC10  
 CCC(CC) (c1ccc(OCC(O)CO)c(C) c1) c1ccc(OCC(O)C(C) (C)C)c(C) c1  
 CCCc1cc(C(O) (CC)CC)ccc1-c1cc(CCc2ccc(O)c(O)c2)ccc1C  
 COc1ccc(C=CC2=[N+] (C) c3ccc(C(=O)OC)cc3C2(C)C)cc1  
 CC(OCCNS(C) (=O)=O)C1CCC2C(=CC=C3CC(O)CC(O)C3)CCC21C  
 C=C1C(=CC=C2CCCC3(C)C2CC3C(C)COC#CC(C) (C)C)CC(O)CC10  
 C=C1C(=CC=C2CCCC3(C)C2CC3C(C)CC2OC(=O)C(=C)C2CCCC)CC(O)C(OCCO)C10  
 COc1ccccc1NC(c1ccccc1Cl) c1c(C) [nH] c2ccccc12  
 CCC(CC) (c1ccc(OCC(O)C(C) (C)C)c(C) c1) c1ccc(C(=O)NCC(=O)O)n1C  
 C=C1C(O)CC(=CC=C2CCCC3(C)C2CC3C(C)C=CCC(O)C23CC4CC(CC(C4)C2)C3)CC10  
 C=C1C(=CC=C2CCCC3(C)C2CC3C(C)CC2CC(C) (O)C(=O)N2CCCC2cc(OC)cc(OC)c2)CC(O)CC10  
 C=C1C(=CC=C2CCCC3(C)C2CC3C(C)CC2CC(C) (O)C(=O)N2CCc2cc(OC)cc(OC)c2)CC(O)CC10  
 CCC(CC) (c1ccc(OCC(=O)C(C) (C)C)c(C) c1) c1ccc(C(=O)NC(CC(=O)O)C(=O)O)n1C

C=C1C(=CC=C2CCCC3(C)C2CCC3C(C)(C)CC)CC(=O)C(=CCO)C1O  
 C=C1C(=CC=C2CCCC3(C)C2CCC3C(C)C=CC(=O)C2(C=CC(=O)OCC)CC2)CC(=O)CC1O  
 CC(CCCNS(N)(=O)=O)C1CCC2C(=CC=C3CC(=O)CC(=O)C3)CCCC21C  
 C=C1C(=O)CC(=CC=C2CCCC3(C)C2CCC3C(C)C(CCCC)CC(=O)(CC)CC)CC1O  
 C=C1C(=CC=C2CCCC3(C)C2CCC3C(C)C=CC(=O)C2(C(=O)OCCC)CC2)CC(=O)CC1O  
 C=C1C(=CC=C2CCCC3(C)C2CCC3C(C)CCCC(C)(C)O)CC(=O)CC1C(F)F  
 CCn1c(C(=O)NC(C)C(=O)O)ccc1C(CC)(CC)c1ccc(OCC(=O)C(C)(C)C)c(C)c1  
 C=C1C(=CC=C2CCCC3(C)C2CCC3C(C)CC2CC(C)(O)C(=O)N2Cc2cccc2)CC(=O)CC1O  
 C=C1C(=CC=C2CCCC3(C)C2CCC3C(C)CC2CC(C)(O)C(=O)N2Cc2cc(OCC)cc(OCC)c2)CC(=O)CC1O

## S4.7 Sample 7

### S4.7.1 Training set

C=C1C(=O)CC(=CC=CCCC(C)CCCC(C)(C)O)CC1O  
 CC(CCCNS(=O)(=O)c1cccc1)C1CCC2C(=CC=C3CC(=O)CC(=O)C3)CCCC21C  
 Cc1[nH]c2cccc2c1C(Nc1ccc(Cl)cc1)c1ncs1  
 CCC(=CC=CC(=O)(C(F)(F)F)C(F)(F)F)c1cccc(Cc2ccc(CO)c(CO)c2)c1  
 C=C1C(=CC=C2CCCC3(C)C2CCC3C(C)C(CCO)CCCC)CC(=O)CC1O  
 CCC(CC)(c1ccc(OCC(=O)C(C)(C)C)c(C)c1)c1ccc(C(=O)NC(C)C(=O)O)n1C  
 C=C1C(=O)CC(=CC=C2CCCC3(C)C2CCC3C(C)CCC(O)(CC)CC)CC1O  
 Cc1ccc2c(C(NC3ccc(C(F)(F)F)cc3)c3cccc3Cl)c(C)[nH]c2c1  
 COc1ccc2c(C(Nc3ccc(Cl)cc3)c3cccc3Cl)c(C)[nH]c2c1  
 C=C1C(=O)CC(=CC=C2CCCC3(C)C2CCC3C(C)OCC(C)C(C)(C)O)CC1O  
 C=C1C(=O)CC(=CC=C2CCCC3(C)C2CCC3C(C)C(CCCC)CCO)CC1O  
 C=C1C(=O)CC(=CC=C2CCCC3(C)C2CCC3C(C)C(C)(C)CCC(C)(C)O)CC1O  
 C=C1C(=CC=C2CCCC3(C)C(C4(CCC(=O)C(C)(C)O)CC4)=CC23)CC(=O)CC1O  
 CCC(CC)(c1ccc(OCC(=O)C(C)(C)C)c(C)c1)c1ccc(C(=O)NC(C)CO)n1C  
 C=C1C(=CC=C2CCC(C)CCCC(C)(C)O)C3(C)C2CCC3C(C)CCO)CC(=O)CC1O  
 Cc1ccc(-c2csc(=N)n2CC(=O)N2CCN(c3cccc3)CC2)cc1  
 C=C1CC(C(C)C)C2CCC3C(=CC=C4CC(=O)C(=C)C(O)C4)CCCC32C)OC1=O  
 CCC(CC)(c1ccc(OCC(=O)C(C)(C)C)c(C)c1)c1ccc(C(=O)NC(C(=O)O)C(=O)O)n1C  
 CC(CCCC(C)(C)O)C1CCC2C(=CC=C3CC(=O)C(=CCO)C(O)C3)CCCC21C  
 CCC(CC)(c1ccc(OCC(=O)C(C)(C)C)c(C)c1)c1ccc(C(=O)NCC(=O)OC)n1C  
 C=C1CCC(O)CC1=CC=C1CCCC2(C)C1CCC2C(C)CCCC(C)C  
 CC(CCCC(C)(C)O)C1CCC2C(=CC=C3CC(=O)C4=CCOC4C3)CCCC21C  
 C=C1C(=CC=C2CCCC3(C)C2CCC3C(C)OCCCC(O)(CC)CC)CC(O)CC1C(F)F  
 COc1ccc(NC(c2cccc2Cl)c2c(C)[nH]c3cccc23)cc1OC  
 CC(CCCCC(=O)Nc1cccc1N)C1CCC2C(=CC=C3CC(=O)CC(=O)C3)CCCC21C  
 CC(CCCNS(=O)(=O)C(F)(F)F)C1CCC2C(=CC=C3CC(=O)CC(=O)C3)CCCC21C  
 CCC(CC)(c1ccc(OCC(=O)C(C)(C)C)c(C)c1)c1ccc(OCC(=O)C(C)(C)C)c(C)c1  
 COc1ccc(C(Nc2cccc2)c2c(C)[nH]c3cccc23)cc1  
 COC(=O)c1ccc(C=CC2=[N+](C)c3ccc(OC)cc3C2(C)C)cc1  
 CC(CCCC(C)(C)O)C1CCC2C(=CC=C3CC(=O)C(=CCF)C(O)C3)CCCC21C  
 C=C1C(=CC=C2CCCC3(C)C2CCC3C(C)CC2OC(=O)C(=C)C2CCCC)CC(=O)C(CCO)C1O  
 C=C1C(=O)CC(=CC=C2CCCC3(C)CCCC(C)(C)O)CCC23)CC1O  
 CCC(CC)(c1ccc(OCC(=O)C(C)(C)C)c(C)c1)c1ccc(C(=O)NC(CO)CO)n1C  
 CC(O)CCCC(C)C1CCC2C(=CC=C3CC(=O)C(C)C(O)C3)CCCC21C  
 CCC(=CC=CC(=O)(CC)CC)c1cccc(OCC2ccc(CO)c(CO)c2)c1  
 CCC(CC)(c1ccc(OCC(=O)CO)c(C)c1)c1ccc(OCC(=O)C(C)(C)CCC2cccc2)c(C)c1  
 C=C1C(=CC=C2CCCC3(C)C2CCC3C(C)CC2OC(=O)C(=C)C2CC)CC(=O)C(C)C1O  
 CN1CCN(C(=O)Gn2c(-c3ccc(Cl)cc3)csc2=N)CC1  
 C=C1C(=O)CC(=CC=C2CCCC3(C)C2CCC3C(C)C(CCCC)CCC(C)(C)O)CC1O  
 CCn1c(C(=O)NCCO)ccc1C(CC)(CC)c1ccc(OCC(=O)C(C)(C)C)c(C)c1  
 C=C1C(=O)CC(=CC=C2CCCC3(C)C2CCC3C(C)C(CCCC)CC(=O)(CC)CC)CC1O  
 C=C1C(=CC=C2CCCC3(C)C2CCC3C(C)CS2ccc(C(C)(C)O)cc2)CC(=O)CC1O  
 Cc1ccc(CNC(c2cccc2Cl)c2c(C)[nH]c3cc(C)ccc23)cc1  
 C=C1C(=O)CC(=CC=C2CCCC3(C)C2CCC3C(C)C(CO)CCO)CC1O

Cc1 [nH] c2ccccc2c1C(Nc1ccc(Cl)cc1)c1ccnc1  
 CC(=O)N1CCN(C(=O)Cn2c(-c3ccc(Cl)cc3)csc2=N)CC1  
 CCC(CC)(c1ccc(OCC(O)CO)c(C)c1)c1ccc(OCC(O)C(C)(C)C)c(C)c1  
 Cc1 [nH] c2ccccc2c1C(Nc1cccc1)c1ccc(Cl)cc1  
 C=C1C(=CC=C2CCCC3(C)C2CC3C(C)C(CCCC)CCC(C)(C)O)CC(O)CC10  
 C=C1C(=CC=C2CCCC3(C)C2CC3C(C)CC2OC(=O)C(=C)C2CCCC)CC(O)CC10  
 C=C1C(=CC=C2CCCC3(C)C2CC3C(C)CC2CC(C)(O)C(=O)N2CCCc2ccccc2)CC(O)CC10  
 C=C1C(=CC=C2CCCC3(C)C(C(C)CCCC(C)(C)O)CCC23C)CC(O)CC10  
 Cc1ccc2c(C(Nc3ccccc3)c3ccccc3Cl)c(C)[nH]c2c1  
 C=C1C(=CC=C2CCCC3(C)C2CC3C(C)CC2CC(C)(O)C(=O)N2CCCc2ccccc2)CC(O)CC10  
 C=C1C(=CC=C2CCCC3(C)C2CC3C(C)CC2CC(C)(O)C(=O)N2CCc2cc(O)cc(O)c2)CC(O)CC10  
 C=C1C(=CC=C2CCCC3(C)C2CC3C(C)CCCC(C)(C)O)CC(O)C2=CCOC12  
 C=C1C(O)CC(=CC=C2CCCC3C2CC3C(C)CCCC(C)(C)O)CC10  
 COc1ccc(NC(c2ccc(O)F)F)cc2)c2c(C)[nH]c3ccccc23)cc1OC  
 CC(C)S(=O)(=O)c1oc(-c2cccs2)nc1S(=O)(=O)c1ccccc1  
 COCCCC=C1C(O)CC(=CC=C2CCCC3(C)C2CC3C(C)CCCC(C)(C)O)CC10  
 C=C1C(O)CC(=CC=C2CCCC3(C)C2CC3C(C)C=CC(O)C23CC4CC(CC(C4)C2)C3)CC10  
 C=C1C(O)CC(=CC=C2CCCC3(C)C2CC3C(C)CC#CC(O)CC23CC4CC(CC(C4)C2)C3)CC10  
 C=C1C(=CC=C2CCCC3(C)C2CC3C(C)CC2OC(=O)C(=C)C2CC)CC(O)C(CCCO)C10  
 C=C1C(=CC=C2CCCC3(C)C2CC3C(C)CCCC(C)(C)O)CC(O)C(Cc2n2cnc2)C10  
 CCC(CC)(c1ccc(OCC(O)C(C)(C)C)c(C)c1)c1ccc(C(=O)NCCC)nc1C  
 CCC(CC)(c1ccc(OCC(O)C(C)(C)C)c(C)c1)c1ccc(C(=O)NCCC(=O)O)nc1C  
 C=C1C(=CC=C2CCCC3(C)C2CC3C(C)C(C)CCC(C)(C)O)CC(O)CC10  
 Cc1 [nH] c2ccccc2c1C(Nc1cccc1)c1ccccc1Cl  
 CC(=O)N1CCN(C(=O)Cn2c(-c3ccc(C)cc3)csc2=N)CC1  
 C=C1C(=CC=C2CCC(CCCCC(C)(C)O)C3(C)C2CC3C(C)CO)CC(O)CC10  
 N=c1sc(-c2ccccc2)nc1CC(=O)N1CCN(c2ccccc2)CC1  
 C=C1C(O)CC(=CC=C2CCCC3(C)C2CC3C(C)C(C)CCC(C)(C)O)CC10  
 CCn1c(C(=O)NCC(=O)O)ccc1C(CC)(CC)c1ccc(OCC(=O)C(C)(C)C)c(C)c1  
 Cc1 [nH] c2ccccc2c1C(Nc1ccc(Cl)cc1)c1ncc [nH] 1  
 C=C1C(=CC=C2CCCC3(C)C2CC3C(C)C=CC(O)C2(C(=O)OCCCC)CC2)CC(O)CC10  
 C=C(COCC(C)C1CCC2C(=CC=C3CC(O)CC(O)C3=C)CCCC21C)C1=CCCC1(C)C  
 Cc1ccc2c(C(Nc3ccc(C(F)F)cc3)c3ccccc3Cl)c(C)[nH]c2c1  
 C=C1C(=CC=C2CCCC3(C)C2CC3C(C)CC2CC(C)(O)C(=O)N2Cc2cc(O)cc(O)c2)CC(O)CC10  
 CC(CCC(=O)O)C1CCC2C3CCC4CC(O)CCC4(C)C3CCC12C  
 C=C1C(O)CC(=CC=C2CCCC3(C)C2CC3C(C)C(C)CCC(C)(C)O)CC10  
 Cc1ccc2c(C(Nc3ccc(Cl)cc3)c3ccccc3Cl)c(C)[nH]c2c1  
 C=C1C(=O)OC(CC(C)C2CC3C(=CC=C4CC(O)C(O)C4=C)CCCC32C)C1C  
 CCC(O)(CC)CSC(C)C1=CCC2C(=CC=C3CC(O)C(C)(O)C(O)C3)CCCC12C  
 C=C1C(=O)OC(CC(C)C2CC3C(=CC=C4CC(O)C(C)C(O)C4=C)CCCC32C)C1C  
 CCCOC1C(O)CC(=CC=C2CCCC3(C)C(C(C)SCC(O)(CC)CC)=CCC23)CC10  
 C=C1C(O)CC(=CC=C2CCCC3(C)C2CC3C(C)C=CCC(O)C23CC4CC(CC(C4)C2)C3)CC10  
 C=C1C(=CC=C2CCCC3(C)C2CC3C(C)CC2OC(=O)C(=C)C23CCCC3)CC(O)CC10  
 CC(CCCC(=O)Nc1ccccc1N)C1CCC2C(=CC=C3CC(O)CC(O)C3)CCCC21C  
 C=C1C(=CC=C2CCCC3(C)C2CC3C(C)CC2CC(C)(O)C(=O)N2C)CC(O)CC10  
 C=C1C(=CC=C2CCCC3(C)C2CC3C(C)CC)CC(O)C(=CCO)C10  
 C=C1C(=CC=C2CCCC3(C)C2CC3C(C)CC2OC(=O)C(=C)C2CC(C)C)CC(O)C(C)C10  
 CC(CCCC(C)(C)O)C1CCC2C(=CC=C3CC(O)CC(O)C3=O)CCCC21C  
 CCn1c(C(=O)NC(C)CO)ccc1C(CC)(CC)c1ccc(OCC(O)C(C)(C)C)c(C)c1  
 CC(C)CS(=O)(=O)c1oc(-c2cccs2)nc1S(=O)(=O)c1ccc(F)cc1  
 COC(=O)c1ccc2c(c1)C(C)(C)C(C=Cc1ccc(O)cc1)=[N+]<sub>2</sub>C  
 C=C1C(=CC=C2CCCC3(C)C2CC3C(C)CC2OC(=O)C(=C)C2CCCC)CC(O)C(C)C10  
 CCC(CC)(c1ccc(OCC(=O)C(C)(C)C)c(C)c1)c1ccc(C(=O)NCCC(=O)O)nc1C  
 C=C1C(=CC=C2CCCC3(C)C2CC3C(C)C=CC(O)C2(C=CC(=O)O)CC2)CC(O)CC10  
 C=C1C(=CC=C2CCCC3(C)C2CC3C(C)CCC(O)C(C)C)CC(O)CC10  
 C=C1C(=CC=C2CCCC3(C)C2CC3C(C)CCCC(C)(C)C)CC(O)CC10

## S4.7.2 Testing set

The SMILES strings of the recreated VDR ligands are highlighted in yellow.

C=C1C(O)CC(=CC=C2CCCC3(C)C2CCC3C(C)CCCC(C)O)CC1O  
C=C1C(=CC=C2CCCC3(C)C2CCC3C(C)CCCC(C)(C)O)CC(O)C(Cc2ncnm2)C1O  
**C=C1C(=CC=C2CCCC3(C)C2CCC3C(C)CCCC(C)(C)O)CC(O)CC1O**  
C=C1C(=CC=C2CCCC3(C)C2CCC3C(C)C(C)CCC(C)(C)O)CC(O)CC1O  
CCC(O)(CC)CSC(C)C1=CCC2C(=CC=C3CC(O)C(O)CCO)C(O)C3)CCCC12C  
CCC(O)(CC)CSC(C)C1=CCC2C(=CC=C3CC(O)C(=CO)C(O)C3)CCCC12C  
C=C1C(=CC=C2CCCC3(C)C2CCC3C(C)CCCC(C)(C)O)CC(O)C(Cc2ncnm2)C1O  
CCC(CC)(c1ccc(OCC(O)C(C)(C)C)c(C)c1)c1ccc(OCC(O)CCO)c(C)c1  
C=C1C(O)CC(=CC=C2CCCC3(C)C2CCC3C(C)CC#CC(O)C23CC4CC(CC(C4)C2)C3)CC1O  
C=C1C(=CC=C2CCCC3(C)C2CCC3C(C)COc2ccc(C(C)(C)O)c2)CC(O)CC1O  
CCCOC1C(O)CC(=CC=C2CCCC3(C)C(C)C)SCCCC(O)(CC)CC(=CCC23)CC1O  
C=C1C(O)CC(=CC=C2CCCC3(C)C2CCC3C(C)CCCC(C)(C)O)CC1O  
C=C1C(O)CC(=CC=C2CCCC3(C)C2CCC3C(C)C(CCCC)CC(C)(C)O)CC1O  
**C=C1C(O)CC(=CC=C2CCCC3(C)C(CCCC(C)(C)O)CCC23)CC1O**  
C=C1C(=CC=C2CCCC3(C)C2CCC3C(C)CCCC(C)(C)O)CC(O)C(Cc2c2nm2)C1O  
C=C1C(O)CC(=CC=C2CCCC3(C)C2CCC3C(C)C(CCO)CCCC)CC1O  
C=C1C(=CC=C2CCCC3(C)C2CCC3C(C)CCCC(C)(C)O)CC(O)C(Cc2c2nm2)C1O  
C=C1C(=CC=C2CCCC3(C)C2CCC3C(C)(C)CC)CC(O)C(=CCO)C1O  
C=C1C(=CC=C2CCCC3(C)C2CCC3C(C)C=CC(O)C2CC2)CC(O)CC1O  
C=C1C(O)CC(=CC=C2CCCC3(C)C2CCC3C(C)C(C)CC(O)(CC)CC)CC1O  
C=C1C(=CC=C2CCCC3(C)C2CCC3C(C)CC(C)C)CC(O)C(=CCO)C1O  
CCCc1cc(C(O)(CC)CC)ccc1-c1cc(CCc2ccc(O)c(O)c2)ccc1C  
C=C1C(=CC=C2CCCC3(C)C(C4(CCCC(C)(C)O)CC4)=CCC23)CC(O)CC1O  
C=C1C(=CC=C2CCCC3(C)C2CCC3C(C)CCCC(C)(C)O)CC(O)C(Cc2c2nc2)C1O  
CCC(CC)(c1ccc(OCC(O)C(C)(C)C)c(C)c1)c1ccc(OCC(O)C(O)CO)c(C)c1  
CCC(CC)(c1ccc(OCC(O)CO)c(C)c1)c1ccc(OCC(O)C(C)C)c(C)c1  
C=C1C(O)CC(=CC=C2CCCC3(C)C2CCC3C(C)C(C)CC(C)(C)O)CC1O  
C=C1C(=CC=C2CCCC3(C)C2CCC3C(C)CC2CC(C)(O)C(=O)N2Cc2cccc2)CC(O)CC1O  
C=C1C(O)CC(=CC=CCC(C)(C)CC(C)CCCC(C)(C)O)CC1O  
CCCc1cc(C(O)(CC)CC)ccc1-c1cc(OCC2ccc(O)c(O)c2)ccc1CC  
**C=C1C(O)CC(=CC=C2CCCC3(C)C2CCC3C(C)C(C)CCO)CC1O**  
C=C1C(O)CC(=CC=CCC(C)CC(C)CCCC(C)(C)O)CC1O  
C=C1C(O)CC(=CC=C2CCCC3(C)C2CCC3C(C)C=CCC(O)CC23CC4CC(CC(C4)C2)C3)CC1O  
C=C1C(=CC=C2CCCC3(C)C2CCC3C(C)C(CCCC)CC(O)C(C)C)CC(O)CC1O  
CCn1c(C(=O)NC(C)C(=O)O)ccc1C(CC)(CC)c1ccc(OCC(O)C(C)(C)C)c(C)c1  
CCC(=CC=CC(O)(C(F)(F)F)C(F)(F)F)c1cccc(OCC2ccc(O)c(O)c2)c1  
C=C1CC(CC(C)C)C2CCC3C(=CC=C4CC(O)CC(O)C4=C)CCCC32C)OC1=O  
C=C1C(=CC=C2CCCC3(C)C2CCC3C(C)CC2OC(=O)C(=C)C2(C)C)CC(O)CC1O  
C=C1C(=CC=C2CCCC3(C)C2CCC3C(C)CC2OC(=O)C(=C)C2CCC)CC(O)CC1O  
C=C1C(=O)OC(CC(C)C)C2CCC3C(=CC=C4CC(O)C(CCO)C(O)C4=C)CCCC32C)C1C  
C=C1C(=CC=C2CCCC3(C)C2CCC3C(C)CC2OC(=O)C(=C)C2CCC)CC(O)C(C)C1O  
C=C1C(=CC=C2CCCC3(C)C2CCC3C(C)CC2OC(=O)C(=C)C2CCC)CC(O)C(CCO)C1O  
C=C1C(=CC=C2CCCC3(C)C2CCC3C(C)CC2OC(=O)C(=C)C2CCC)CC(O)C(OCCCC)C1O  
C=C1C(=CC=C2CCCC3(C)C2CCC3C(C)CC2OC(=O)C(=C)C2C)CC(O)CC1O  
C=C1C(=CC=C2CCC(C)CCCC(C)(C)O)C3(C)C2CCC3C(C)CO)CC(O)CC1O  
C=C1C(=CC=C2CCCC3(C)C2CCC3C(C)CC2OC(=O)C(=C)C2CC)CC(O)C(OCCCC)C1O  
C=C1C(=CC=C2CCCC3(C)C2CCC3C(C)CC2OC(=O)C(=C)C2CC)CC(O)CC1O  
C=C1C(=CC=C2CCCC3(C)C2CCC3C(C)CC2OC(=O)C(=C)C2CCC)CC(O)C(OCCCC)C1O  
C=C1C(=CC=C2CCCC3(C)C2CCC3C(C)CC2OC(=O)C(=C)C2CC(C)C)CC(O)CC1O  
C=C1C(=CC=C2CCCC3(C)C2CCC3C(C)CC2OC(=O)C(=C)C2CC(C)C)CC(O)C(CCO)C1O  
CCC(CC)(c1ccc(OCC(O)C(C)(C)C)c(C)c1)c1ccc(OCC(O)CCO)c(C)c1  
CCCCS(=O)(=O)NCCCC(C)C1CCC2C(=CC=C3CC(O)CC(O)C3)CCCC21C  
C=C1C(=CC=C2CCCC3(C)C2CCC3C(C)CCCC(C)(C)O)CC(O)CC1C(F)F  
CC(CCCNC(=O)CS)C1CCC2C(=CC=C3CC(O)CC(O)C3)CCCC21C

CC[Si] (CC) (c1ccc(OCC(=O)C(C)(C)C)c(C)c1)c1ccc(OCC2C02)c(C)c1  
 C=C1C(=CC=C2CCCC3(C)C2CCC3C(C)C0CC#CC(C)(C)C)CC(O)CC10  
 CC(C=CCC(O)C12CC3CC(C(C3)C1)C2)C1CCC2C(=CC=C3CC(O)CC(O)C3)CCCC21C  
 C=C1C(=CC=C2CCCC3(C)C(C(C)C)CC(F)(F)C(O)(CC)CC)=CCG23)CC(O)CC1C(F)F  
 C=C1C(=CC=C2CCCC3(C)C2CCC3C(C)CCCC(C)(C)O)CC2OCC=C2C10  
 C=C1C(O)CC(=CC=CCC(C)=CC(C)CCCC(C)(C)O)CC10  
 C=C1C(=CC=C2CCCC3(C)C2CCC3C(C)C0Cc2ccccc2)CC(O)CC10  
 C=C1C(=CC=C2CCCC3(C)C2CCC3C(C)C0CC(=C)C(C)(C)C)CC(O)CC10  
 CC(C=CC(=O)NO)=CC(C)C1CCC2C(=CC=C3CC(O)CC(O)C3)CCCC21C  
 C=C1C(=CC=C2CCCC3(C)C2CCC3C(C)CC2CC(C)(O)C(=O)N2Cc2cc(OCC)cc(OCC)c2)CC(O)CC10  
 CCC(CC)(c1ccc(OCC(=O)C(C)(C)C)c(C)c1)c1ccc(OCC(O)CO)c(C)c1  
 CC(C=CC(=O)Nc1ccccc1N)=CC(C)C1CCC2C(=CC=C3CC(O)CC(O)C3)CCCC21C  
 CCn1c(C(=O)NC(O)CCO)ccc1C(CC)(CC)c1ccc(OCC(O)C(C)(C)C)c(C)c1  
 C=C1C(=CC=C2CCCC3(C)C2CCC3C(C)CC2CC(C)(O)C(=O)N2Cc2ccccc2)CC(O)CC10  
 CC(CCCCN(C)(=O)=O)C1CCC2C(=CC=C3CC(O)CC(O)C3)CCCC21C  
 C=C1C(=CC=C2CCCC3(C)C2CCC3C(C)C0CC(=C)C2(C)CCCC2)CC(O)CC10  
 CC(CCCN(C)(=O)=O)C1CCC2C(=CC=C3CC(O)CC(O)C3)CCCC21C  
 CC(CCCCC(=O)NO)C1CCC2C(=CC=C3CC(O)CC(O)C3)CCCC21C  
 CC(CCCCN(C)(=O)=O)C1CCC2C(=CC=C3CC(O)CC(O)C3)CCCC21C  
 C=C1C(=CC=C2CCCC3(C)C2CCC3C(C)CC2CC(C)(O)C(=O)N2Cc2cc(OCC)cc(OCC)c2)CC(O)CC10  
 CC(CCCCN(C)(=O)=O)C1CCC2C(=CC=C3CC(O)CC(O)C3)CCCC21C  
 C=C1C(=CC=C2CCCC3(C)C2CCC3C(C)CC2CC(C)(O)C(=O)N2Cc2cc(OCCCC)cc(OCCCC)c2)CC(O)CC10  
 COc1ccc(C(Nc2ccc(C(F)(F)F)cc2)c2c(C)[nH]c3ccccc23)cc1  
 Cc1ccc(NC(c2ccccc2Cl)c2c(C)[nH]c3ccccc23)cc1C  
 C=C1C(=CC=C2CCCC3(C)C2CCC3C(C)CC2CC(C)(O)C(=O)N2Cc2ccc(OCC)cc2)CC(O)CC10  
 C=C1C(=CC=C2CCCC3(C)C2CCC3C(C)CC2CC(C)(O)C(=O)N2CCc2cc(OCC)cc(OCC)c2)CC(O)CC10  
 CCCS(=O)(=O)c1oc(-c2cccs2)nc1S(=O)(=O)c1ccc(F)cc1  
 Nc1nc2ccc(S(=O)(=O)N3CCCC3)cc2s1  
 N=c1scc(-c2ccc(Cl)cc2)n1CC(=O)N1CCN(c2ccccc2)CC1  
 CC(C)CC(N)C(=O)NC(CC(C)C)C(=O)NC1C0CC(O)C(O)C0CC(C(=O)O)NC(=O)C(CC(C)C)NC(=O)C(C)C(C)NC(=O)C(C)C(NC1=O)

COc1ccc(C(Nc2ccc(OCC)cc(OCC)c2)c2c(C)[nH]c3ccccc23)cc1  
 COC(=O)c1ccc2c(c1)C(C)(C)C(C=Cc1ccc(OCC)cc1)=[N+]2C  
**Cc1[nH]c2ccccc2c1C(Nc1ccc(Cl)cc1)c1ccncc1**  
 COc1ccc(C=CC2=[N+](C)c3ccc(OCC)cc3C2(C)C)cc1  
 Cc1[nH]c2ccccc2c1C(Nc1ccc(Cl)cc1)c1ccccc1Cl  
 N=c1scc(-c2ccc(Cl)cc2)n1CC(=O)N1CCOCC1  
 Cc1[nH]c2ccccc2c1C(Nc1ccc([N+](=O)[O-])cc1)c1ccccc1Cl  
 COc1ccc(NC(c2ccc(C(F)(F)F)cc2)c2c(C)[nH]c3ccccc23)cc1OC  
 CC(=O)N1CCN(C(=O)Cn2c(-c3ccccc3)csc2=N)CC1  
 CCC(CC)(c1ccc(OCC(O)C(C)(C)C)c(C)c1)c1ccc(C(=O)NCC(=O)O)n1C  
 Cc1ccc2c(C(Nc3ccc(OCC(F)(F)F)cc3)c3ccccc3Cl)c(C)[nH]c2c1  
 CCS(=O)(=O)c1oc(-c2cccs2)nc1S(=O)(=O)c1ccccc1  
 Cc1[nH]c2ccccc2c1C(Nc1ccccc1)c1ccccc1Cl  
 COc1ncccc1NC(c1ccccc1)c1c(C)[nH]c2cc(C)ccc12  
 COc1ccc(C=CC2=[N+](C)c3ccc(C(=O)OCC)cc3C2(C)C)cc1  
 COc1ccc(NC(c2ccccc2Cl)c2c(C)[nH]c3ccccc23)cc1  
 Cc1ccc2c(C(NC3ccccc3)c3ccccc3Cl)c(C)[nH]c2c1  
 CCC(CC)(c1ccc(OCC(O)CO)c(C)c1)c1ccc(OCC(O)C(C)(C)CCc2ccccc2)c(C)c1  
 CS(=O)(=O)c1ccc(C(=O)NCCCC(=O)N2CCN(c3ccc(C(F)(F)F)cc3)CC2)cc1[N+](=O)[O-]  
 Cc1ccc(NC(c2ccccc2Cl)c2c(C)[nH]c3ccccc23)cc1  
 COc1ccccc1NC(c1ccccc1Cl)c1c(C)[nH]c2ccccc12  
 COc1ccc(NC(c2nccs2)c2c(C)[nH]c3ccccc23)cc1OC  
 Cc1[nH]c2ccccc2c1C(Nc1ccc(N(C)C)cc1)c1ccccc1Cl  
 Cc1[nH]c2ccccc2c1C(Nc1ccccc1)c1ccc(C(C)C)cc1  
 COc1ccc(NC(c2ccccc2Cl)c2c(C)[nH]c3cc(C)ccc23)cc1OC



### S4.7.3 Seeds

C=C1C(O)CC(=CC=C2CCCC3(C)C2CCC3C(C)C=CCC(O)C23CC4CC(CC(C4)C2)C3)CC1O  
C=C1C(=CC=C2CCCC3(C)C2CCC3C(C)CCCC(C)(C)O)CC(O)C(CCn2cncn2)C1O  
CC(CCCC(=O)Nc1ccccc1N)C1CC2C(=CC=C3CC(O)CC(O)C3)CCCC21C  
C=C1C(=O)OC(CC(C)C2CCCC3(=CC=C4CC(O)C(C)C(O)C4=C)CCCC32C)C1C  
C=C1C(=CC=C2CCC(C)CCCC(C)(C)O)C3(C)C2CCC3C(C)CCCC(O)CC(O)CC1O  
C=C1C(O)CC(=CC=C2CCCC3(C)C2CCC3C(C)C(CCCC)CCC(C)(C)O)CC1O  
Cc1ccc2c(C(Nc3ccc(C(F)(F)F)cc3)c3ccccc3Cl)c(C)[nH]c2c1  
C=C1C(=CC=C2CCCC3(C)C2CCC3C(C)CC2CC(C)(O)C(=O)N2Cc2cc(OCCC)cc(OCCC)c2)CC(O)CC1O  
C=C1C(O)CC(=CC=C2CCCC3(C)C2CCC3C(C)C(C)CCCC)CC1O  
C=C1C(=CC=C2CCCC3(C)C2CCC3C(C)CSc2ccc(C(C)(C)O)cc2)CC(O)CC1O  
CCC(CC)(c1ccc(OCC(O)C(C)(C)C)c(C)c1)c1ccc(C(=O)NCCC)N1C  
Cc1ccc(-c2csc(=N)n2CC(=O)N2CCN(c3ccccc3)CC2)cc1  
C=C1C(=CC=C2CCCC3(C)C2CCC3C(C)CC2OC(=O)C(=C)C2CC)CC(O)C(CCCO)C1O  
COCOC=CC=C1C(O)CC(=CC=C2CCCC3(C)C2CCC3C(C)CCCC(C)(C)O)CC1O  
N=c1sc(-c2ccccc2)n1CC(=O)N1CCN(c2ccccc2)CC1  
CCC(CC)(c1ccc(OCC(O)C(C)(C)C)c(C)c1)c1ccc(C(=O)NC(C)CO)N1C  
CCn1c(C(=O)NCC(=O)OC)ccc1C(CC)(CC)c1ccc(OCC(=O)C(C)(C)C)c(C)c1  
Cc1ccc(CNC(c2ccccc2Cl)c2c(C)[nH]c3cc(C)ccc23)cc1  
C=C(COCC(C)C1CCC2C(=CC=C3CC(O)CC(O)C3=C)CCCC21C)C1=CCCC1(C)C  
C=C1C(=CC=C2CCCC3(C)C(C)CCCC(C)(C)O)CCC23C)CC(O)CC1O  
C=C1C(O)CC(=CC=C2CCCC3(C)C2CCC3C(C)CCC(O)(CC)CC)CC1O  
Cc1[nH]c2ccccc2c1C(Nc1ccc(Cl)cc1)c1cccn1  
CCC(CC)(c1ccc(OCC(O)CO)c(C)c1)c1ccc(OCC(O)C(C)(C)C)c(C)c1  
C=C1C(O)CC(=CC=C2CCCC3C(C)CCCC(C)(C)O)CCC23)CC1O  
C=C1C(=CC=C2CCCC3(C)C2CCC3C(C)C=CC(O)C2(C(=O)OCCCC)CC2)CC(O)CC1O  
C=C1C(=CC=C2CCCC3(C)C2CCC3C(C)C(C)CCC(C)(C)O)CC(O)CC1O  
CCC(CC)(c1ccc(OCC(=O)C(C)(C)C)c(C)c1)c1ccc(C(=O)NCCC(=O)OC)N1C  
CC(O)CCCC(C)C1CC2C(=CC=C3CC(O)C(C)C(O)C3)CCCC21C  
CCC(=CC=CC(O)(C(F)(F)F)C(F)(F)F)c1cccc(CCc2ccc(CO)c(CO)c2)c1  
C=C1C(=CC=C2CCCC3(C)C2CCC3C(C)CCCC(C)(C)C)CC(O)CC1O

## S4.8 Sample 8

### S4.8.1 Training set

CC(C)CC(N)C(=O)NC(CC(C)C)C(=O)NC1COC(O)C(O)COC(C(=O)O)NC(=O)C(CC(C)C)NC(=O)C(CC(C)C)NC(=O)C(C)(C)NC1=O  
Cc1[nH]c2ccccc2c1C(Nc1ccc(N(C)C)cc1)c1ccccc1Cl  
C=C1C(O)CC(=CC=C2CCCC3(C)C2CCC3C(C)C(CCCC)CCC(C)(C)O)CC1O  
Cc1ccc(CNC(c2ccccc2Cl)c2c(C)[nH]c3cc(C)ccc23)cc1  
CCn1c(C(=O)NC(C)CO)ccc1C(CC)(CC)c1ccc(OCC(O)C(C)(C)C)c(C)c1  
COc1ccc(NC(c2ccccc2Cl)c2c(C)[nH]c3ccccc23)cc1OC  
Cc1ccc(NC(c2ccccc2Cl)c2c(C)[nH]c3ccccc23)cc1  
C=C1C(O)CC(=CC=C2CCCC3(C)C2CCC3C(C)CCCC(C)O)CC1O  
Cc1ccc2c(C(NC3ccc(C(F)(F)F)cc3)c3ccccc3Cl)c(C)[nH]c2c1  
CCC(CC)(c1ccc(OCC(=O)C(C)(C)C)c(C)c1)c1ccc(OCC(O)CO)c(C)c1  
C=C1C(=CC=C2CCCC3(C)C2CCC3C(C)C(CCCC)CC(O)C(C)C)CC(O)CC1O  
CCC(CC)(c1ccc(OCC(=O)C(C)(C)C)c(C)c1)c1ccc(C(=O)NC(CC(=O)O)C(=O)O)N1C  
C=C1C(O)CC(=CC=C2CCCC3(C)C2CCC3C(C)C(C)CCC(C)(C)O)CC1O  
Cc1ccc2c(C(Nc3ccc(C(F)(F)F)cc3)c3ccccc3Cl)c(C)[nH]c2c1  
Cc1ccc2c(C(Nc3ccc(Cl)cc3)c3ccccc3Cl)c(C)[nH]c2c1  
C=C1C(O)CC(=CC=C2CCCC3(C)C2CCC3C(C)C(C)CCC(C)(C)O)CC1O  
C=C1CC(C)C2CCC3C(=CC=C4CC(O)C(=C)C(O)C4)CCCC32C)OC1=O  
CCC(=CC=CC(O)(C(F)(F)F)C(F)(F)F)c1cccc(CCc2ccc(CO)c(CO)c2)c1  
C=C1C(O)CC(=CC=C2CCCC3(C)C2CCC3C(C)CC#CC(O)C23CC4CC(CC(C4)C2)C3)CC1O  
CCC(CC)(c1ccc(OCC(O)C(C)(C)C)c(C)c1)c1ccc(OCC(O)CCO)c(C)c1

C=C1C(=CC=C2CCCC3(C)C2CCC3C(C)CC2OC(=O)C(=C)C2CCC)CC(O)C(C)C1O  
CCCCC1C(O)CC(=CC=C2CCCC3(C)C(C(C)SCCC(O)(CC)CC)=CCC23)CC1O  
C=C1C(=CC=C2CCCC3(C)C2CCC3C(C)CCCC(C)(C)O)CC(O)C(Cc1n2cnn2)C1O  
CCC(O)(CC)CSC(C)C1=CC2C(=CC=C3CC(O)C(=CCO)C(O)C3)CCCC12C  
C=C1C(O)CC(=CC=C2CCCC3(C)C2CCC3C(C)CC#CC(O)CC23CC4CC(CC(C4)C2)C3)CC1O  
C=C1C(O)CC(=CC=C2CCCC3(C)C2CCC3C(C)CCC(O)(CC)CC)CC1O  
COc1ccc(C(Nc2ccc(OC)c(OC)c2)c2c(C)[nH]c3ccccc23)cc1  
CCC(CC)(c1ccc(OC(O)C(C)(C)C)c(C)c1)c1ccc(C(=O)NCCC0)n1C  
C=C1C(=CC=C2CCCC3(C)C2CCC3C(C)CCCC(C)(C)O)CC(O)C(Cc1n2cnn2)C1O  
C=C1C(=CC=C2CCCC3(C)C2CCC3C(C)COC#CC(C)(C)O)CC(O)CC1O  
COc1ccc(C(Nc2cccn2)c2c(C)[nH]c3ccccc23)cc1  
C=C1C(=CC=C2CCCC3(C)C2CCC3C(C)CC2OC(=O)C(=C)C2CCC)CC(O)CC1O  
C=C1C(=CC=C2CCCC3(C)C2CCC3C(C)CCCC(C)(C)O)CC(O)C(Cc1n2cnn2)C1O  
C=C1C(=CC=C2CCCC3(C)C2CCC3C(C)CC2OC(=O)C(=C)C2C)CC(O)CC1O  
CCS(=O)(=O)c1oc(-c2cccs2)nc1S(=O)(=O)c1ccccc1  
COc1ccccc1NC(c1ccccc1Cl)c1c(C)[nH]c2ccccc12  
CC(CCCC(C)(C)O)C1CCC2C(=CC=C3CC(O)C(=CCF)C(O)C3)CCCC21C  
C=C1C(=O)OC(CC(C)C2CCC3C(=CC=C4CC(O)C(OC)C)C(O)C4=C)CCCC32C)C1C  
C=C1C(=CC=C2CCCC3(C)C2CCC3C(C)CC2OC(=O)C(=C)C2CC)CC(O)C(OC)C1O  
C=C1C(O)CC(=CC=CCC(C)=CC(C)CCCC(C)(C)O)CC1O  
Cc1[nH]c2ccccc2c1C(Nc1cccn1)c1ccc(C(C)C)cc1  
CCC(CC)(c1ccc(OC(=O)C(C)(C)C)c(C)c1)c1ccc(OC(=O)C(C)(C)C)c(C)c1  
C=C1C(O)CC(=CC=C2CCCC3(C)C2CCC3C(C)C(CCCC)CC(O)(CC)CC)CC1O  
C=C1C(O)CC(=CC=CCC(C)(C)CC(C)CCCC(C)(C)O)CC1O  
C=C1C(=CC=C2CCCC3(C)C2CCC3C(C)CCCC(C)(C)O)CC(O)CC1C(F)F  
CC(CCCCC(=O)Nc1ccccc1N)C1CCC2C(=CC=C3CC(O)CC(O)C3)CCCC21C  
C=C1C(=CC=C2CCCC3(C)C2CCC3C(C)C(CC)CCC(C)(C)O)CC(O)CC1O  
C=C1C(=CC=C2CCCC3(C)C2CCC3C(C)CCCC(C)(C)O)CC(O)CC1O  
CCCCC1C(O)CC(=CC=C2CCCC3(C)C(C(C)SCCC(O)(CC)CC)=CCC23)CC1O  
C=C1C(O)CC(=CC=C2CCCC3C(C)CCCC(C)(C)O)CCC23)CC1O  
CCn1c(C(=O)NCC(=O)OC)ccc1C(CC)(CC)c1ccc(OC(=O)C(C)(C)C)c(C)c1  
CC(CCCC(C)(C)O)C1CCC2C(=CC=C3CC(O)C4=CCOC4C3)CCCC21C  
C=C1C(=CC=C2CCCC3(C)C2CCC3C(C)CC2CC(C)(O)C(=O)N2CCc2ccccc2)CC(O)CC1O  
CCC(O)(CC)CSC(C)C1=CC2C(=CC=C3CC(O)C(C)(O)C(O)C3)CCCC12C  
C=C1C(=CC=C2CCCC3(C)C2CCC3C(C)CC2CC(C)(O)C(=O)N2CCc2ccccc2)CC(O)CC1O  
CC(CCCNS(N)(=O)=O)C1CCC2C(=CC=C3CC(O)CC(O)C3)CCCC21C  
C=C1C(O)CC(=CC=C2CCCC3(C)C2CCC3C(C)C(C)(C)CCC(C)(C)O)CC1O  
C=C1C(=CC=C2CCCC3(C)C(C4(CCC(=O)C(C)(C)O)CC4)=CCC23)CC(O)CC1O  
C=C1C(=CC=C2CCCC3(C)C2CCC3C(C)C=CC(O)C2CC2)CC(O)CC1O  
C=C1C(=CC=C2CCCC3(C)C2CCC3C(C)CCCC(C)(C)O)CC(O)C2=CCOC12  
Cc1[nH]c2ccccc2c1C(Nc1ccc([N+](=O)[O-])cc1)c1ccccc1Cl  
Cc1ccc(NC(c2ccccc2Cl)c2c(C)[nH]c3ccccc23)cc1C  
C=C1C(=CC=C2CCCC3(C)C2CCC3C(C)CC2OC(=O)C(=C)C2CCCC)CC(O)CC1O  
C=C1C(O)CC(=CC=C2CCCC3(C)C2CCC3C(C)C(CC)CCO)CC1O  
C=C1C(=CC=C2CCCC3(C)C2CCC3C(C)CCC(O)C(C)C)CC(O)CC1O  
C=C1C(=CC=C2CCCC3(C)C2CCC3C(C)CCCC(C)(C)O)CC2OC=C2C1O  
COc1ccc(NC(c2ccc(OC(F)F)cc2)c2c(C)[nH]c3ccccc23)cc1OC  
CCn1c(C(=O)NCCO)ccc1C(CC)(CC)c1ccc(OC(O)C(C)(C)C)c(C)c1  
Cc1[nH]c2ccccc2c1C(Nc1ccc(Cl)cc1)c1cnc1  
C=C1C(O)CC(=CC=C2CCCC3(C)C2CCC3C(C)C(CCCC)CCO)CC1O  
N=c1sc(-c2ccccc2)n1CC(=O)N1CCN(c2ccccc2)CC1  
C=C1CCC(O)CC1=CC=C1CCCC2(C)C1CCC2C(C)CCCC(C)C  
C=C1C(=CC=C2CCCC3(C)C2CCC3C(C)CC)CC(O)C(=CCO)C1O  
C=C1C(O)CC(=CC=C2CCCC3(C)C2CCC3C(C)C(CC)CC(C)(C)O)CC1O  
C=C1C(=CC=C2CCC(C)CCCC(C)(C)O)C3(C)C2CCC3C(C)CCO)CC(O)CC1O  
C=C1C(=CC=C2CCCC3(C)C2CCC3C(C)COC(=C)C(C)(C)O)CC(O)CC1O  
C=C1C(=CC=C2CCCC3(C)C2CCC3C(C)CC2CC(C)(O)C(=O)N2CCc2cc(OC)cc(OC)c2)CC(O)CC1O  
CC(=O)N1CCN(C(=O)Cn2c(-c3ccccc3)csc2=N)CC1  
C=C1C(=CC=C2CCCC3(C)C2CCC3C(C)OCCCC(O)(CC)CC)CC(O)CC1C(F)F

Cc1[nH]c2cccc2c1C(NCc1cccc1)c1cccc1C1  
CCn1c(C(=O)NC(CO)CCO)ccc1C(CC)(CC)c1ccc(OCC(O)C(C)(C)C)c(C)c1  
CCC(CC)(c1ccc(OCC(O)C(C)(C)C)c(C)c1)c1ccc(C(=O)NC(CO)CCO)n1C  
CCC(O)(CC)CSC(C)C1=CC2C(=CC=C3CC(O)C(OCCO)C(O)C3)CCCC12C  
C=C1C(=CC=C2CCCC3(C)C(C(C)CCCC(C)(C)O)CCC23C)CC(O)CC1O  
CC(CCCC(C)(C)O)C1CCC2C(=CC=C3CC(O)C(=CCO)C(O)C3)CCCC21C  
CC(=O)N1CCN(C(=O)Cn2c(-c3ccc(C1)cc3)csc2=N)CC1  
C=C1C(=CC=C2CCCC3(C)C2CCC3C(C)CC2CC(C)(O)C(=O)N2Cc2cc(OCCCC)cc(OCCCC)c2)CC(O)CC1O  
COC(=O)c1ccc2c(c1)C(C)(C)C(C=Cc1ccc(O)cc1)=[N+]2C  
C=C1C(=CC=C2CCCC3(C)C2CCC3C(C)C(CCCC)CCC(C)(C)O)CC(O)CC1O  
CCCCS(=O)(=O)NCCCC(C)C1CCC2C(=CC=C3CC(O)CC(O)C3)CCCC21C  
Cc1ccc2c(C(NC3cccc3)c3cccc3C1)c(C)[nH]c2c1  
CC(C=CCC(O)C12CC3CC(CC(C3)C1)C2)C1CCC2C(=CC=C3CC(O)CC(O)C3)CCCC21C  
CCC(CC)(c1ccc(OCC(O)C(C)(C)C)c(C)c1)c1ccc(OCC(O)C(O)O)c(C)c1  
C=C1C(=CC=C2CCCC3(C)C2CCC3C(C)CC2CC(C)(O)C(=O)N2Cc2cc(OCC)cc(OCC)c2)CC(O)CC1O  
C=C1C(O)CC(=CC=C2CCCC3(C)C(CCCC)CCC(C)(C)O)CCC23)CC1O  
C=C1C(=CC=C2CCCC3(C)C2CCC3C(C)CC2OC(=O)C(=C)C2CC)CC(O)C(CCCO)C1O  
COc1ccc2c(C(Nc3ccc(C1)cc3)c3cccc3C1)c(C)[nH]c2c1  
C=C1C(=CC=C2CCCC3(C)C2CCC3C(C)C=CC(O)C2(C=CC(=O)OCC)CC2)CC(O)CC1O  
CCC(CC)(c1ccc(OCC(=O)C(C)(C)C)c(C)c1)c1ccc(C(=O)NC(C(=O)O)n1C  
C=C1C(O)CC(=CC=C2CCCC3C2CCC3C(C)CCCC(C)(C)O)CC1O

#### S4.8.2 Testing set

The SMILES strings of the recreated VDR ligands are highlighted in yellow.

C=C1C(=CC=C2CCCC3(C)C2CCC3C(C)CCCC(C)(C)O)CC(O)CC1O  
C=C1C(O)CC(=CC=C2CCCC3(C)C2CCC3C(C)C=CC(O)C23CC4CC(CC(C4)C2)C3)CC1O  
CC(O)CCCC(C)C1CCC2C(=CC=C3CC(O)C(C)C(O)C3)CCCC21C  
C=C1C(=CC=C2CCCC3(C)C2CCC3C(C)C(C)CCC(C)(C)O)CC(O)CC1O  
CCC(CC)(c1ccc(OCC(O)O)c(C)c1)c1ccc(OCC(O)C(C)(C)C)c(C)c1  
CCC(CC)(c1ccc(OCC(O)C(C)(C)C)c(C)c1)c1ccc(OCC(O)O)c(C)c1  
C=C1C(=CC=C2CCCC3(C)C2CCC3C(C)COc2ccc(C(C)(C)O)cc2)CC(O)CC1O  
C=C1C(=CC=C2CCCC3(C)C2CCC3C(C)CSc2ccc(C(C)(C)O)cc2)CC(O)CC1O  
C=C1C(O)CC(=CC=C2CCCC3(C)C2CCC3C(C)CCCC(C)(C)O)CC1O  
C=C1C(O)CC(=CC=C2CCCC3(C)C2CCC3C(C)OCC(C)C(C)(C)O)CC1O  
C=C1C(O)CC(=CC=C2CCCC3(C)C2CCC3C(C)C(CCCC)CC(C)(C)O)CC1O  
C=C1C(=CC=C2CCCC3(C)C2CCC3C(C)CCCC(C)(C)O)CC(O)C(Cc2cncn2)C1O  
C=C1C(=CC=C2CCCC3(C)C2CCC3C(C)CCCC(C)(C)O)CC(O)C(Cc2c2cnn2)C1O  
C=C1C(=CC=C2CCCC3(C)C2CCC3C(C)C(CCC)CC(O)C(=CCO)C1O  
C=C1C(O)CC(=CC=C2CCCC3(C)C2CCC3C(C)C(C)CC(O)CC(O)CC1O  
C=C1C(=CC=C2CCCC3(C)C2CCC3C(C)C=CC(O)C2(C(=O)OCCCC)CC2)CC(O)CC1O  
C=C1C(=CC=C2CCCC3(C)C2CCC3C(C)CC(C)C)CC(O)C(=CCO)C1O  
CCCc1cc(C(O)(CC)CC)ccc1-c1cc(CCc2ccc(O)c(O)c2)ccc1C  
CC(OCCC(C)(C)O)C1CCC2C(=CC=C3CC(O)CC(O)C3=O)CCCC21C  
C=C1C(=CC=C2CCCC3(C)C(C4(CCCC(C)(C)O)CC4)=CCC23)CC(O)CC1O  
C=C1C(O)CC(=CC=C2CCCC3(C)C2CCC3C(C)C=CCC(O)C23CC4CC(CC(C4)C2)C3)CC1O  
CCC(CC)(c1ccc(OCC(O)O)c(C)c1)c1ccc(OCC(O)C(C)(C)C)c(C)c1  
C=C1C(=CC=C2CCCC3(C)C2CCC3C(C)C(CCO)CCCC)CC(O)CC1O  
C=C1C(=CC=C2CCCC3(C)C2CCC3C(C)CC2CC(C)(O)C(=O)N2Cc2cccc2)CC(O)CC1O  
CCCc1cc(C(O)(CC)CC)ccc1-c1cc(OCC2ccc(O)c(O)c2)ccc1CC  
C=C1C(O)CC(=CC=CCC(C)CC(C)CCCC(C)(C)O)CC1O  
C=C1C(O)CC(=CC=C2CCCC3(C)C2CCC3C(C)C=CCC(O)CC23CC4CC(CC(C4)C2)C3)CC1O  
CCn1c(C(=O)NC(C(=O)O)ccc1C(CC)(CC)c1ccc(OCC(O)C(C)(C)C)c(C)c1  
CCC(=CC=CC(O)(C(F)(F)F)C(F)(F)F)c1cccc(OCC2ccc(O)c(O)c2)c1  
C=C1CC(CC(C)C2CCC3C(=CC=C4CC(O)CC(O)C4=C)CCCC32C)OC1=O

C=C1C(=CC=C2CCCC3(C)C2CCC3C(C)CC20C(=O)C(=C)C2(C)C)CC(O)CC10  
C=C1C(=CC=C2CCCC3(C)C2CCC3C(C)CC20C(=O)C(=C)C23CCCC3)CC(O)CC10  
C=C1C(=O)OC(CC(C)C)C2CCC3C(=CC=C4CC(O)C(CCCO)C(O)C4=C)CCCC32C)C1C  
C=C1C(=CC=C2CCCC3(C)C2CCC3C(C)CC20C(=O)C(=C)C2CCC)CC(O)C(CCCO)C10  
C=C1C(=CC=C2CCCC3(C)C2CCC3C(C)CC20C(=O)C(=C)C2CCC)CC(O)C(C)C10  
C=C1C(=CC=C2CCCC3(C)C2CCC3C(C)CC20C(=O)C(=C)C2CC)CC(O)C(C)C10  
C=C1C(=O)OC(CC(C)C)C2CCC3C(=CC=C4CC(O)C(C)C(O)C4=C)CCCC32C)C1C  
**C=C1C(O)CC(=CC=C2CCCC3(C)C2CCC3C(C)C(CC)CCO)CC10**  
C=C1C(=CC=C2CCC(C)CCCC(C)C(C)O)C3(C)C2CCC3C(C)CO)CC(O)CC10  
C=C1C(=CC=C2CCCC3(C)C2CCC3C(C)CC20C(=O)C(=C)C2CC)CC(O)CC10  
C=C1C(=CC=C2CCCC3(C)C2CCC3C(C)CC20C(=O)C(=C)C2CCCC)CC(O)C(CCCO)C10  
C=C1C(=CC=C2CCCC3(C)C2CCC3C(C)CC20C(=O)C(=C)C2CCCC)CC(O)C(OCCC)C10  
C=C1C(=CC=C2CCCC3(C)C2CCC3C(C)CC20C(=O)C(=C)C2CC)CC(O)C(C)C10  
C=C1C(=CC=C2CCCC3(C)C2CCC3C(C)CC20C(=O)C(=C)C2CC(C)C)CC(O)C(CCCO)C10  
C=C1C(=CC=C2CCCC3(C)C2CCC3C(C)CC2CC(C)O)C(=O)N2C)CC(O)CC10  
C=C1C(=CC=C2CCCC3(C)C2CCC3C(C)CC20C(=O)C(=C)C2CC(C)C)CC(O)C(C)C10  
CC(CCCNS(=O)(=O)C(F)F)C1CC2C(=CC=C3CC(O)CC(O)C3)CCCC21C  
CC(CCCNS(=O)(=O)C1cccc1)C1CC2C(=CC=C3CC(O)CC(O)C3)CCCC21C  
CCC(CC)(c1ccc(OCC(=O)C(C)C)c(C)c1)c1ccc(C(=O)NCC(=O)OC)n1C  
CC(CCCNC(=O)CS)C1CC2C(=CC=C3CC(O)CC(O)C3)CCCC21C  
CC[Si](CC)(c1ccc(OCC(=O)C(C)C)c(C)c1)c1ccc(OCC2CO2)c(C)c1  
CCC(=CC=CC(O)CC)CC1cccc(OCc2ccc(CO)c(CO)c2)c1  
C=C1C(=CC=C2CCCC3(C)C(C(C)CCC(F)F)C(O)CC)CC(=CC23)CC(O)CC1C(F)F  
C=C1C(O)CC(=CC=C2CCCC(C)CCCC(C)C)O)CC10  
COCOC=C1C(O)CC(=CC=C2CCCC3(C)C2CCC3C(C)CCCC(C)C)O)CC10  
C=C1C(=CC=C2CCCC3(C)C2CCC3C(C)COCc2cccc2)CC(O)CC10  
CC(C=CC(=O)NO)=CC(C)C1CC2C(=CC=C3CC(O)CC(O)C3)CCCC21C  
CC(C=CC(=O)Nc1cccc1N)=CC(C)C1CC2C(=CC=C3CC(O)CC(O)C3)CCCC21C  
C=C1C(=CC=C2CCCC3(C)C2CCC3C(C)CC2CC(C)O)C(=O)N2Cc2cc(OCC)cc(OCCC)c2)CC(O)CC10  
CC(CCCNS(N)(=O)=O)C1CC2C(=CC=C3CC(O)CC(O)C3)CCCC21C  
C=C1C(=CC=C2CCCC3(C)C2CCC3C(C)COC(=C)C2(C)CCCC2)CC(O)CC10  
CC(CCCNS(C)(=O)=O)C1CC2C(=CC=C3CC(O)CC(O)C3)CCCC21C  
CC(CCCC(=O)NO)C1CC2C(=CC=C3CC(O)CC(O)C3)CCCC21C  
C=C(COCC(C)C1CC2C(=CC=C3CC(O)CC(O)C3=C)CCCC21C)C1=CCCC1(C)C  
C=C1C(=CC=C2CCCC3(C)C2CCC3C(C)CC2CC(C)O)C(=O)N2Cc2cc(OC)cc(OC)c2)CC(O)CC10  
CC(CCCNS(C)(=O)=O)C1CC2C(=CC=C3CC(O)CC(O)C3)CCCC21C  
CC(CCC(=O)O)C1CC2C3CC4CC(O)CCC4(C)C3CCC12C  
C=C1C(=CC=C2CCCC3(C)C2CCC3C(C)CC2CC(C)O)C(=O)N2CCCCc2cccc2)CC(O)CC10  
CC(CCCC(=O)Nc1cccc1N)C1CC2C(=CC=C3CC(O)CC(O)C3)CCCC21C  
**CCC(CC)(c1ccc(OCC(O)C(C)C)c(C)c1)c1ccc(C(=O)NC(C)CO)n1C**  
COC1ccc(C(Nc2ccc(C(F)F)cc2)c2c(C)[nH]c3cccc23)cc1  
C=C1C(=CC=C2CCCC3(C)C2CCC3C(C)CC2CC(C)O)C(=O)N2Cc2ccc(OC)cc2)CC(O)CC10  
C=C1C(=CC=C2CCCC3(C)C2CCC3C(C)CC2CC(C)O)C(=O)N2CCCCc2cc(OC)cc(OC)c2)CC(O)CC10  
CCC(CC)(c1ccc(OCC(=O)C(C)C)c(C)c1)c1ccc(C(=O)NCCC(=O)OC)n1C  
Cc1ccc(-c2csc(=N)n2CC(=O)N2CCN(c3cccc3)CC2)cc1  
CCCS(=O)(=O)c1oc(-c2cccs2)nc1S(=O)(=O)c1ccc(F)cc1  
CCC(CC)(c1ccc(OCC(O)C(C)C)c(C)c1)c1ccc(C(=O)NCCC(=O)O)n1C  
Nc1nc2ccc(S(=O)(=O)N3CCCC3)cc2s1  
CC(C)S(=O)(=O)c1oc(-c2cccs2)nc1S(=O)(=O)c1cccc1  
CC(=O)N1CCN(C(=O)Cn2c(-c3ccc(C)cc3)csc2=N)CC1  
N=c1sc(-c2ccc(Cl)cc2)n1CC(=O)N1CCN(c2cccc2)CC1  
Cc1[nH]c2cccc2c1C(Nc1ccc(Cl)cc1)c1cccnc1  
COC(=O)c1ccc2c(c1)C(C)C(C)C(C=Cc1ccc(OC)cc1)=[N+]2C  
CCC(CC)(c1ccc(OCC(O)CO)c(C)c1)c1ccc(OCC(O)C(C)C)CCCc2cccc2)c(C)c1  
CN1CCN(C(=O)Cn2c(-c3ccc(Cl)cc3)csc2=N)CC1  
Cc1[nH]c2cccc2c1C(Nc1ccc(Cl)cc1)c1ncs1

COc1ccc(C=CC2=[N+](C)c3ccc(OC)cc3C2(C)C)cc1  
Cc1[nH]c2cccc2c1C(Nc1ccc(Cl)cc1)c1cccc1Cl  
N=c1scc(-c2ccc(Cl)cc2)n1CC(=O)N1CCOCC1  
COc1ccc(NC(c2ccc(C(F)(F)F)cc2)c2c(C)[nH]c3cccc23)cc10C  
CCC(CC)(c1ccc(OC(C)C(C)C)c(C)c1)c1ccc(C(=O)NCC(=O)O)n1C  
Cc1ccc2c(C(Nc3ccc(OC(F)(F)F)cc3)c3cccc3Cl)c(C)[nH]c2c1  
COc1ncccc1NC(c1cccnc1)c1c(C)[nH]c2cc(C)ccc12  
CCOc1ccc(C=CC2=[N+](C)c3ccc(C(=O)OC)cc3C2(C)C)cc1  
COc1ccc(NC(c2cccc2Cl)c2c(C)[nH]c3cccc23)cc1  
CC(C)CS(=O)(=O)c1oc(-c2cccs2)nc1S(=O)(=O)c1ccc(F)cc1  
Cc1[nH]c2cccc2c1C(Nc1ccc(Cl)cc1)c1ncc[nH]1  
Cc1ccc2c(C(Nc3cccnc3)c3cccc3Cl)c(C)[nH]c2c1  
CCC(CC)(c1ccc(OC(C)C(C)C)c(C)c1)c1ccc(OC(C)C(C)CCc2cccc2)c(C)c1  
CS(=O)(=O)c1ccc(C(=O)NCCCC(=O)N2CCN(c3ccc(C(F)(F)F)cc3)CC2)cc1[N+](=O)[O-]  
Cc1[nH]c2cccc2c1C(Nc1cccc1)c1ccc(Cl)cc1  
COC(=O)c1ccc(C=CC2=[N+](C)c3ccc(OC)cc3C2(C)C)cc1  
Cc1[nH]c2cccc2c1C(Nc1cccc1)c1cccc1Cl  
COc1ccc(NC(c2nccs2)c2c(C)[nH]c3cccc23)cc10C  
COc1ccc(NC(c2cccc2Cl)c2c(C)[nH]c3cc(C)ccc23)cc10C

### S4.8.3 Seeds

CCC(CC)(c1ccc(OC(C)C(C)C)c(C)c1)c1ccc(OC(C)C(C)C)c(C)c1  
C=C1C(O)CC(=CC=C2CCCC3(C)C(C)C)CCC23)CC1O  
CCCOC1C(O)CC(=CC=C2CCCC3(C)C(C)C)SCCCC(O)(CC)CC=CCC23)CC1O  
CCC(CC)(c1ccc(OC(=O)C(C)C)c(C)c1)c1ccc(OC(C)C(C)C)c(C)c1  
C=C1C(O)CC(=CC=C2CCCC3(C)C(C)C)CCC(C)(C)O)CCC23)CC1O  
C=C1C(=CC=C2CCCC3(C)C2CCC3C(C)CC2OC(=O)C(=C)C2CCC)CC(O)CC1O  
C=C1C(=CC=C2CCCC3(C)C2CCC3C(C)C=CC(O)C2(C=CC(=O)OCC)CC2)CC(O)CC1O  
C=C1C(O)CC(=CC=C2CCCC3(C)C2CCC3C(C)C(CCCC)CCC(C)(C)O)CC1O  
CCCOC1C(O)CC(=CC=C2CCCC3(C)C(C)C)SCCC(O)(CC)CC=CCC23)CC1O  
Cc1ccc(NC(c2cccc2Cl)c2c(C)[nH]c3cccc23)cc1  
CCC(CC)(c1ccc(OC(=O)C(C)C)c(C)c1)c1ccc(C(=O)NC(CC(=O)O)C(=O)O)n1C  
CCC(CC)(c1ccc(OC(C)C(C)C)c(C)c1)c1ccc(C(=O)NC(CO)CCO)n1C  
CC(=O)N1CCN(C(=O)Cn2c(-c3ccc(Cl)cc3)csc2=N)CC1  
COc1ccc2c(C(Nc3ccc(Cl)cc3)c3cccc3Cl)c(C)[nH]c2c1  
C=C1C(=CC=C2CCCC3(C)C(C)C)CCCC(C)(C)O)CCC23C)CC(O)CC1O  
C=C1CCC(O)CC1=CC=C1CCCC2(C)C1CCC2C(C)CCC(C)C  
C=C1C(=CC=C2CCCC3(C)C2CCC3C(C)CCCC(C)(C)C)CC(O)CC1O  
C=C1C(=CC=C2CCCC3(C)C2CCC3C(C)OCCCC(O)(CC)CC)CC(O)CC1C(F)F  
Cc1ccc(NC(c2cccc2Cl)c2c(C)[nH]c3cccc23)cc1C  
C=C1C(O)CC(=CC=CCC(C)(C)CC(C)CCCC(C)(C)O)CC1O  
C=C1C(=O)OC(C(C)C)C2CCC3C(=CC=C4CC(O)C(O)C4=C)CCCC32C)C1C  
CCC(=CC=CC(O)(C(F)(F)F)C(F)(F)F)c1ccc(CCCc2ccc(CO)c(CO)c2)c1  
Cc1[nH]c2cccc2c1C(Nc1ccccn1)c1ccc(C(C)C)cc1  
C=C1C(=CC=C2CCCC3(C)C2CCC3C(C)CC2OC(=O)C(=C)C2C)CC(O)CC1O  
CCC(CC)(c1ccc(OC(C)C(C)C)c(C)c1)c1ccc(C(=O)NCCC)O)n1C  
CCC(CC)(c1ccc(OC(=O)C(C)C)c(C)c1)c1ccc(OC(=O)C(C)(C)C)c(C)c1  
CCn1c(C(=O)NC(CO)CCO)ccc1C(CC)(CC)c1ccc(OC(C)C(C)C)c(C)c1  
C=C1C(=CC=C2CCCC3(C)C2CCC3C(C)C(C)CCC(C)(C)O)CC(O)CC1O  
C=C1C(=CC=C2CCCC3(C)C2CCC3C(C)CC2CC(C)(O)C(=O)N2CCc2cccc2)CC(O)CC1O  
C=C1C(=CC=C2CCCC3(C)C2CCC3C(C)C(C)C)CC(=C)C(C)C)CC(O)CC1O

## S4.9 Sample 9

### S4.9.1 Training set

CDc1ccc(C(Nc2ccc(C(F)(F)F)cc2)c2c(C)[nH]c3ccccc23)cc1  
 CC(=O)N1CCN(C(=O)Cn2c(-c3ccc(Cl)cc3)csc2=N)CC1  
 Cc1ccc(CNC(c2ccccc2Cl)c2c(C)[nH]c3cc(C)ccc23)cc1  
 CCn1c(C(=O)NC(C)C(=O)O)ccc1C(CC)(CC)c1ccc(OCC(O)C(C)(C)C)c(C)c1  
 C=C1C(=CC=C2CCCC3(C)C2CCC3C(C)CSc2ccc(C(C)(C)O)cc2)CC(O)CC1O  
 N=c1scc(-c2ccc(Cl)cc2)n1CC(=O)N1CCOCC1  
 C=C1C(=CC=C2CCCC3(C)C2CCC3C(C)CC2OC(=O)C(=C)C2CC)CC(O)CC1O  
 C=C1C(=CC=C2CCCC3(C)C2CCC3C(C)CCCC(C)(C)C)CC(O)CC1O  
 Cc1[nH]c2ccccc2c1C(Nc1ccc(Cl)cc1)c1nccs1  
 C=C1C(=CC=C2CCCC3(C)C2CCC3C(C)CC2OC(=O)C(=C)C2CC)CC(O)C(C)C1O  
 Cc1ccc(NC(c2ccccc2Cl)c2c(C)[nH]c3ccccc23)cc1C  
 CCC(O)(CC)CSC(C)C1=CCC2C(=CC=C3CC(O)C(OCCO)C(O)C3)CCCC12C  
 C=C1C(=CC=C2CCCC3(C)C2CCC3C(C)CC2OC(=O)C(=C)C2CC(C)C)CC(O)C(CCCO)C1O  
 CCC(CC)(c1ccc(OCC(=O)C(C)(C)C)c(C)c1)c1ccc(OCC(=O)C(C)(C)C)c(C)c1  
 CC(OCCNS(C)(=O)=O)C1CCC2C(=CC=C3CC(O)CC(O)C3)CCCC21C  
 CDc1ccc(NC(c2ccc(C(F)(F)F)cc2)c2c(C)[nH]c3ccccc23)cc1OC  
 C=C1C(=CC=C2CCCC3(C)C2CCC3C(C)C=CC(O)C2CC2)CC(O)CC1O  
 CCC(CC)(c1ccc(OCC(=O)C(C)(C)C)c(C)c1)c1ccc(C(=O)NC(C)C(=O)O)n1C  
 C=C1C(O)CC(=CC=CCC(C)(C)CC(C)CCCC(C)(C)O)CC1O  
 Cc1[nH]c2ccccc2c1C(Nc1cccn1)c1ccc(C(C)C)cc1  
 C=C1C(=CC=C2CCCC3(C)C2CCC3C(C)CC2CC(C)(O)C(=O)N2C)CC(O)CC1O  
 C=C1C(=CC=C2CCCC3(C)C2CCC3C(C)CC2OC(=O)C(=C)C2CC(C)C)CC(O)C(OCCO)C1O  
 C=C1C(O)CC(=CC=C2CCCC3(C)C2CCC3C(C)CCCC(C)(C)O)CC1O  
 C=C1C(=CC=C2CCCC3(C)C2CCC3C(C)CC(C)C)CC(O)C(=CCO)C1O  
 CCC(CC)(c1ccc(OCC(O)C(C)(C)C)c(C)c1)c1ccc(OCC(O)C(O)CO)c(C)c1  
 CCn1c(C(=O)NCCO)ccc1C(CC)(CC)c1ccc(OCC(O)C(C)(C)C)c(C)c1  
 CCn1c(C(=O)NC(C)CO)ccc1C(CC)(CC)c1ccc(OCC(O)C(C)(C)C)c(C)c1  
 C=C1C(=CC=C2CCCC3(C)C2CCC3C(C)C=CC(O)C2(C(=O)OCCO)CC2)CC(O)CC1O  
 C=C1C(=CC=C2CCCC3(C)C2CCC3C(C)CC2CC(C)(O)C(=O)N2Cc2cc(OCC)cc(OCC)c2)CC(O)CC1O  
 C=C1C(=CC=C2CCCC3(C)C2CCC3C(C)CC2OC(=O)C(=C)C2CCC)CC(O)C(OCCO)C1O  
 C=C1C(=CC=C2CCCC3(C)C2CCC3C(C)CC2CC(C)(O)C(=O)N2Cc2cc(OCCO)cc(OCCO)c2)CC(O)CC1O  
 CC(OCCNS(=O)(=O)c1ccccc1)C1CCC2C(=CC=C3CC(O)CC(O)C3)CCCC21C  
 C=C1C(O)CC(=CC=C2CCCC3(C)C2CCC3C(C)OCC(C)C(C)(C)O)CC1O  
 C=C1C(=CC=C2CCCC3(C)C2CCC3C(C)CC)CC(O)C(=CCO)C1O  
 CCCc1cc(C(O)(CC)CC)ccc1-c1cc(CCc2ccc(CO)c(CO)c2)ccc1C  
 Cc1ccc2c(C(Nc3ccc(OC(F)(F)F)cc3)c3ccccc3Cl)c(C)[nH]c2c1  
 CC(OCCC(=O)Nc1ccccc1N)C1CCC2C(=CC=C3CC(O)CC(O)C3)CCCC21C  
 C=C1C(O)CC(=CC=C2CCCC3(C)C2CCC3C(C)C=CC(O)C23CC4CC(CC(C4)C2)C3)CC1O  
 CC(C=CCC(O)C12CC3CC(CC(C3)C1)C2)C1CCC2C(=CC=C3CC(O)CC(O)C3)CCCC21C  
 C=C1C(O)CC(=CC=C2CCCC3(C)C2CCC3C(C)CC#CC(O)C23CC4CC(CC(C4)C2)C3)CC1O  
 C=C1C(O)CC(=CC=C2CCCC3(C)C2CCC3C(C)C(CC)CCO)CC1O  
 CC(OCCC(C)(C)O)C1CCC2C(=CC=C3CC(O)C4=CCOC4C3)CCCC21C  
 CCC(CC)(c1ccc(OCC(=O)C(C)(C)C)c(C)c1)c1ccc(OCC(O)CO)c(C)c1  
 C=C1C(O)CC(=CC=C2CCCC3(C)C2CCC3C(C)C(CC)CC(C)(C)O)CC1O  
 C=C1C(=CC=C2CCCC3(C)C2CCC3C(C)CCCC(C)(C)O)CC(O)C(Cc1n2ccn2)C1O  
 C=C1C(=CC=C2CCC(CCCCCC(C)(C)O)C3(C)C2CCC3C(C)CCO)CC(O)CC1O  
 C=C1C(O)CC(=CC=C2CCCC3(C)C2CCC3C(C)C(OCCC)CCO)CC1O  
 CC(C=CC(=O)Nc1ccccc1N)=CC(C)C1CCC2C(=CC=C3CC(O)CC(O)C3)CCCC21C  
 C=C1C(=CC=C2CCCC3(C)C2CCC3C(C)CCCC(C)(C)O)CC(O)C(Cc1n2ccn2)C1O  
 Cc1[nH]c2ccccc2c1C(Nc1ccc([N+](=O)[O-])cc1)c1ccccc1Cl  
 CCC(CC)(c1ccc(OCC(O)C(C)(C)C)c(C)c1)c1ccc(C(=O)NCC(=O)O)n1C  
 Nc1nc2ccc(S(=O)(=O)N3CCCC3)cc2s1  
 C=C1C(=CC=C2CCCC3(C)C2CCC3C(C)CC2CC(C)(O)C(=O)N2Cc2cc(OCC)cc(OCC)c2)CC(O)CC1O  
 CCC(CC)(c1ccc(OCC(O)CO)c(C)c1)c1ccc(OCC(O)C(C)(C)C)c(C)c1  
 C=C1C(=CC=C2CCCC3(C)C2CCC3C(C)CC2OC(=O)C(=C)C2CCCC)CC(O)C(OCCO)C1O  
 CDc1ccc(NC(c2nccs2)c2c(C)[nH]c3ccccc23)cc1OC  
 C=C1C(=CC=C2CCCC3(C)C2CCC3C(C)CC2OC(=O)C(=C)C2CC)CC(O)C(OCCO)C1O  
 C=C1C(O)CC(=CC=CCCC(C)CCCC(C)(C)O)CC1O  
 Cc1[nH]c2ccccc2c1C(Nc1ccc(Cl)cc1)c1cccn1

CC(CCC(=O)O)C1CCC2C3CCC4CC(O)CCC4(C)C3CCC12C  
C=C1C(=CC=C2CCCC3(C)C2CCC3C(C)CCCC(C)(C)O)CC(O)C(CCN2cncn2)C1O  
COc1ccc(NC(c2ccccc2Cl)c2c(C)[nH]c3cc(C)ccc23)cc1OC  
C=C1C(=CC=C2CCCC3(C)C2CCC3C(C)CC2OC(=O)C(=C)C2CCCC)CC(O)CC1O  
COc1ncccc1NC(c1cccnc1)c1c(C)[nH]c2cc(C)ccc12  
C=C1C(=CC=C2CCCC3(C)C2CCC3C(C)CC2OC(=O)C(=C)C2CCCC)CC(O)C(CCCO)C1O  
CCC(CC)(c1ccc(OCC(=O)C(C)(C)C)c(C)c1)c1ccc(C(=O)NCCC(=O)OC)n1C  
CCC(=CC=CC(O)(C(F)(F)F)C(F)(F)F)c1cccc(O)c2ccc(CO)c(CO)c2)c1  
C=C1C(O)CC(=CC=C2CCCC3(C)C(C)CCCC(C)(C)O)CCC23)CC1O  
CC(C=CC(=O)NO)=CC(C)C1CCC2C(=CC=C3CC(O)CC(O)C3)CCCC21C  
C=C1C(=CC=C2CCCC3(C)C2CCC3C(C)CCCC(C)(C)O)CC(O)C2=CCOC12  
C=C1C(O)CC(=CC=CCC(C)CC(C)CCCC(C)(C)O)CC1O  
C=C1C(=CC=C2CCCC3(C)C2CCC3C(C)CCC(O)C(C)C)CC(O)CC1O  
CCOc1ccc(C=CC2=[N+](C)c3ccc(C(=O)OC)cc3C2(C)C)cc1  
C=C1C(O)CC(=CC=C2CCCC3(C)C2CCC3C(C)CCC(O)(CC)CC)CC1O  
Cc1ccc2c(C(Nc3ccc(Cl)cc3)c3ccccc3Cl)c(C)[nH]c2c1  
C=C1C(=CC=C2CCC(C)CCCC(C)(C)O)C3(C)C2CCC3C(C)CO)CC(O)CC1O  
Cc1ccc2c(C(Nc3ccnc3)c3ccccc3Cl)c(C)[nH]c2c1  
CC[Si](CC)(c1ccc(OCC(=O)C(C)(C)C)c(C)c1)c1ccc(OCC2CO2)c(C)c1  
CC(C)CCCCNS(N)(=O)=O)C1CCC2C(=CC=C3CC(O)CC(O)C3)CCCC21C  
C=C1C(=CC=C2CCCC3(C)C2CCC3C(C)CC2OC(=O)C(=C)C2CCCC)CC(O)C(O)CC1O  
C=C1C(=CC=C2CCCC3(C)C2CCC3C(C)CC2OC(=O)C(=C)C2C)CC(O)CC1O  
C=C1C(O)CC(=CC=C2CCCC3(C)C2CCC3C(C)CCCC(C)O)CC1O  
C=C1C(=CC=C2CCCC3(C)C2CCC3C(C)CC2OC(=O)C(=C)C2(C)C)CC(O)CC1O  
C=C1C(O)CC(=CC=C2CCCC3(C)C2CCC3C(C)C=CCC(O)C23CC4CC(CC(C4)C2)C3)CC1O  
C=C1C(=CC=C2CCCC3(C)C(C4(C)C(C)C(C)O)CC4)=CCC23)CC(O)CC1O  
CCCCS(=O)(=O)NCCCC(C)C1CC2C(=CC=C3CC(O)CC(O)C3)CCCC21C  
C=C1C(=CC=C2CCCC3(C)C2CCC3C(C)CCCC(C)(C)O)CC(O)C(CCN2cnmn2)C1O  
C=C1C(=CC=C2CCCC3(C)C2CCC3C(C)OCCCC(O)(CC)CC)CC(O)CC1C(F)F  
C=C1C(=CC=C2CCCC3(C)C2CCC3C(C)C(CC)CCC(C)(C)O)CC(O)CC1O  
C=C1C(=CC=C2CCCC3(C)C2CCC3C(C)C(C)CCC(C)C(C)O)CC(O)CC1O  
COc1ccc2c(C(Nc3ccc(Cl)cc3)c3ccccc3Cl)c(C)[nH]c2c1  
COc1cccc1NC(c1ccccc1Cl)c1c(C)[nH]c2ccccc12  
C=C1C(=CC=C2CCCC3(C)C2CCC3C(C)CCCC(C)(C)O)CC(O)C(CCN2cncn2)C1O  
C=C1C(=CC=C2CCCC3(C)C2CCC3C(C)CCCC(C)(C)O)CC(O)C(CCN2cncn2)C1O  
C=C1C(=O)OC(CC(C)C)C2CCC3C(=CC=C4CC(O)C(C)C(O)C4=C)CCCC32C)C1C  
COC(=O)c1ccc2c(c1)C(C)(C)C(C=Cc1ccc(O)cc1)=[N+]2C  
Cc1[nH]c2ccccc2c1C(Nc1ccc(Cl)cc1)c1cncnc1  
C=C1C(O)CC(=CC=C2CCCC3C(C)CCCC(C)(C)O)CCC23)CC1O  
C=C1C(=CC=C2CCCC3(C)C2CCC3C(C)CC2CC(C)(O)C(=O)N2CCCC2ccccc2)CC(O)CC1O  
Cc1[nH]c2ccccc2c1C(NC1ccccc1)c1ccccc1Cl

### S4.9.2 Testing set

The SMILES strings of the recreated VDR ligands are highlighted in yellow.

C=C1C(=CC=C2CCCC3(C)C2CCC3C(C)CCCC(C)(C)O)CC(O)CC1O  
CCC(O)(CC)CSC(C)C1=CCC2C(=CC=C3CC(O)C(C)(O)C(O)C3)CCCC12C  
C=C1C(O)CC(=CC=C2CCCC3C2CCC3C(C)CCCC(C)(C)O)CC1O  
**CC(O)CCCC(C)C1CCC2C(=CC=C3CC(O)C(C)C(O)C3)CCCC21C**  
C=C1C(O)CC(=CC=C2CCCC3(C)C2CCC3C(C)C(C)(C)CCC(C)(C)O)CC1O  
CCC(O)(CC)CSC(C)C1=CCC2C(=CC=C3CC(O)C(=CCO)C(O)C3)CCCC12C  
CCOC1C(O)CC(=CC=C2CCCC3(C)C(C)C)SCCC(O)(CC)CC)=CCC23)CC1O  
C=C1C(=CC=C2CCCC3(C)C2CCC3C(C)C(C)CCC(C)(C)O)CC(O)CC1O  
CCC(CC)(c1ccc(OCC(O)C)C(C)c1)c1ccc(OCC(O)C(C)C)c(C)c1  
C=C1C(O)CC(=CC=C2CCCC3(C)C2CCC3C(C)C(C)CCC(C)(C)O)CC1O  
CCC(CC)(c1ccc(OCC(O)C)C(C)C)c(C)c1)c1ccc(OCC(O)C)C(C)c1  
CC(C)CCCC(C)(C)O)C1CCC2C(=CC=C3CC(O)C(=CCF)C(O)C3)CCCC21C

C=C1C(=CC=C2CCCC3(C)C2CCC3C(C)C0c2ccc(C(C)(C)O)c2)CC(O)CC10  
CCCC0C1C(O)CC(=CC=C2CCCC3(C)C(C(C)SCCCC(O)(CC)CC)=CCC23)CC10  
C=C1C(O)CC(=CC=C2CCCC3(C)C2CCC3C(C)C(CCCC)CC(C)(C)O)CC10  
C=C1C(=CC=C2CCCC3(C)C(C(C)CCCC(C)(C)O)CCC23C)CC(O)CC10  
C=C1CCC(O)CC1=CC=C1CCCC2(C)C1CCC2C(C)CCCC(C)C  
C=C1C(O)CC(=CC=C2CCCC3(C)C2CCC3C(C)C(CCO)CCCC)CC10  
C=C1C(O)CC(=CC=C2CCCC3(C)C2CCC3C(C)C(CCCC)CCC(C)(C)O)CC10  
C=C1C(=CC=C2CCCC3(C)C2CCC3C(C)(C)CC)CC(O)C(=CCO)C10  
C=C1C(=CC=C2CCCC3(C)C2CCC3C(C)C=CC(O)C2(C=CC(=O)OCC)CC2)CC(O)CC10  
C=C1C(O)CC(=CC=C2CCCC3(C)C2CCC3C(C)C(C(C)CC(O)(CC)CC)CC10  
C=C1C(O)CC(=CC=C2CCCC3(C)C2CCC3C(C)C(CCCC)CC(O)(CC)CC)CC10  
CC(CCCC(C)(C)O)C1CCC2C(=CC=C3CC(O)CC(O)C3=O)CCCC21C  
C=C1C(=CC=C2CCCC3(C)C(C4(CCCC(C)(C)O)CC4)=CCC23)CC(O)CC10  
C=C1CC(C(C)C)C2CCC3C(=CC=C4CC(O)C(=C)C(O)C4)CCCC32C)OC1=O  
C=C1C(O)CC(=CC=C2CCCC3(C)C2CCC3C(C)CC#CC(O)CC23CC4CC(C(C4)C2)C3)CC10  
C=C1C(=CC=C2CCCC3(C)C2CCC3C(C)C(CCO)CCCC)CC(O)CC10  
CCC(=CC=CC(O)(C(F)(F)F)C(F)(F)F)c1cccc(CCc2ccc(CO)c(CO)c2)c1  
C=C1C(=CC=C2CCCC3(C)C2CCC3C(C)CC2CC(C)(O)C(=O)N2Cc2ccccc2)CC(O)CC10  
CCCc1cc(C(O)(CC)CC)ccc1-c1cc(OCCc2ccc(CO)c(CO)c2)ccc1CC  
C=C1C(O)CC(=CC=C2CCCC3(C)C2CCC3C(C)C(C)CC(C)(C)O)CC10  
C=C1C(O)CC(=CC=C2CCCC3(C)C2CCC3C(C)C=CCC(O)CC23CC4CC(C(C4)C2)C3)CC10  
C=C1C(=CC=C2CCCC3(C)C2CCC3C(C)C(CCCC)CC(O)C(C)C)CC(O)CC10  
C=C1CC(C(C)C)C2CCC3C(=CC=C4CC(O)CC(O)C4=C)CCCC32C)OC1=O  
C=C1C(=CC=C2CCCC3(C)C2CCC3C(C)CC2OC(=O)C(=C)C2CCC)CC(O)CC10  
C=C1C(=CC=C2CCCC3(C)C2CCC3C(C)CC2OC(=O)C(=C)C23CCCC3)CC(O)CC10  
C=C1C(=O)OC(C(C)C)C2CCC3C(=CC=C4CC(O)C(CCO)C(O)C4=C)CCCC32C)C1C  
C=C1C(=O)OC(C(C)C)C2CCC3C(=CC=C4CC(O)C(CCO)C(O)C4=C)CCCC32C)C1C  
C=C1C(=CC=C2CCCC3(C)C2CCC3C(C)CC2OC(=O)C(=C)C2CCC)CC(O)C(C)C10  
C=C1C(=CC=C2CCCC3(C)C2CCC3C(C)CC2OC(=O)C(=C)C2CCCC)CC(O)C(C)C10  
C=C1C(O)CC(=CC=C2CCCC3(C)C2CCC3C(C)C(C)CCO)CC10  
C=C1C(=CC=C2CCCC3(C)C2CCC3C(C)CC2OC(=O)C(=C)C2CC)CC(O)C(OCCO)C10  
C=C1C(=CC=C2CCC(C)CCCC(C)(C)O)C3(C)C2CCC3C(C)CO)CC(O)CC10  
C=C1C(=CC=C2CCCC3(C)C2CCC3C(C)CC2OC(=O)C(=C)C2CC(C)C)CC(O)CC10  
C=C1C(=CC=C2CCCC3(C)C2CCC3C(C)CC2OC(=O)C(=C)C2CC(C)C)CC(O)C(C)C10  
CC(CCCC(C)(C)O)C1CCC2C(=CC=C3CC(O)C(=CCO)C(O)C3)CCCC21C  
CC(CCCNS(=O)(=O)C(F)(F)F)C1CCC2C(=CC=C3CC(O)CC(O)C3)CCCC21C  
CCC(CC)(c1ccc(OCC(O)C(C)(C)C)c(C)c1)c1ccc(OCC(O)CCO)c(C)c1  
CCC(CC)(c1ccc(OCC(=O)C(C)(C)C)c(C)c1)c1ccc(C(=O)NCC(=O)OC)n1C  
C=C1C(=CC=C2CCCC3(C)C2CCC3C(C)CCCC(C)(C)O)CC(O)CC1C(F)F  
CC(CCCNC(=O)CS)C1CCC2C(=CC=C3CC(O)CC(O)C3)CCCC21C  
C=C1C(=CC=C2CCCC3(C)C2CCC3C(C)COC#CC(C)(C)C)CC(O)CC10  
CCC(=CC=CC(O)(CC)CC)c1cccc(OCCc2ccc(CO)c(CO)c2)c1  
C=C1C(=CC=C2CCCC3(C)C(C(C)CCC(F)(F)C(O)(CC)CC)=CCC23)CC(O)CC1C(F)F  
C0C0CCC=C1C(O)CC(=CC=C2CCCC3(C)C2CCC3C(C)CCCC(C)(C)O)CC10  
C=C1C(=CC=C2CCCC3(C)C2CCC3C(C)CCCC(C)(C)O)CC2OCC=C2C10  
C=C1C(O)CC(=CC=CCC(C)=CC(C)CCCC(C)(C)O)CC10  
C=C1C(=CC=C2CCCC3(C)C2CCC3C(C)C0Cc2ccccc2)CC(O)CC10  
C=C1C(=CC=C2CCCC3(C)C2CCC3C(C)C0CC(=C)C(C)(C)CC(O)CC10  
CCn1c(C(=O)NC(CO)CCO)ccc1C(CC)(CC)c1ccc(OCC(O)C(C)(C)C)c(C)c1  
CCC(CC)(c1ccc(OCC(O)C(C)(C)C)c(C)c1)c1ccc(C(=O)NCCO)n1C  
CC(CCCCC(=O)N)c1ccccc1N)C1CCC2C(=CC=C3CC(O)CC(O)C3)CCCC21C  
C=C1C(=CC=C2CCCC3(C)C2CCC3C(C)CC2CC(C)(O)C(=O)N2Cc2ccccc2)CC(O)CC10  
C=C1C(=CC=C2CCCC3(C)C2CCC3C(C)COC(=C)C2(C)CCCC2)CC(O)CC10  
CCC(CC)(c1ccc(OCC(O)C(C)(C)C)c(C)c1)c1ccc(C(=O)NC(CO)CCO)n1C  
CC(CCCC(=O)NO)C1CCC2C(=CC=C3CC(O)CC(O)C3)CCCC21C  
CC(CCCNS(N)(=O)=O)C1CCC2C(=CC=C3CC(O)CC(O)C3)CCCC21C  
C=C(COCC(C)C1CCC2C(=CC=C3CC(O)CC(O)C3=C)CCCC21C)C1=CCCC1(C)C  
C=C1C(=CC=C2CCCC3(C)C2CCC3C(C)CC2CC(C)(O)C(=O)N2Cc2cc(OC)cc(OC)c2)CC(O)CC10  
CC(CCCNS(C)(=O)=O)C1CCC2C(=CC=C3CC(O)CC(O)C3)CCCC21C



C=C1C(=CC=C2CCCC3(C)C2CCC3C(C)CC2CC(C)(O)C(=O)N2CCCCc2ccccc2)CC(O)CC1O  
 CCC(CC)(c1ccc(OCC(=O)C(C)(C)C)c(C)c1)c1ccc(C(=O)NC(CC(=O)O)C(=O)O)n1C  
 CCC(CC)(c1ccc(OCC(O)C(C)(C)C)c(C)c1)c1ccc(C(=O)NC(C)CO)n1C  
 C=C1C(=CC=C2CCCC3(C)C2CCC3C(C)CC2CC(C)(O)C(=O)N2Cc2ccc(OC)cc2)CC(O)CC1O  
 C=C1C(=CC=C2CCCC3(C)C2CCC3C(C)CC2CC(C)(O)C(=O)N2CCCC2cc(OC)cc(OC)c2)CC(O)CC1O  
 C=C1C(=CC=C2CCCC3(C)C2CCC3C(C)CC2CC(C)(O)C(=O)N2Cc2cc(OC)cc(OC)c2)CC(O)CC1O  
 Cc1ccc(-c2csc(=N)n2CC(=O)N2CCN(c3ccccc3)CC2)cc1  
 CCCS(=O)(=O)c1oc(-c2cccs2)nc1S(=O)(=O)c1ccc(F)cc1  
 CCC(CC)(c1ccc(OCC(O)C(C)(C)C)c(C)c1)c1ccc(C(=O)NCCC(=O)O)n1C  
 N=c1scc(-c2ccccc2)n1CC(=O)N1CCN(c2ccccc2)CC1  
 CCn1c(C(=O)NCC(=O)OC)ccc1C(CC)(CC)c1ccc(OCC(=O)C(C)(C)C)c(C)c1  
 COc1ccc(NC(c2ccc(OC(F)(F)F)cc2)c2c(C)[nH]c3ccccc23)cc1OC  
 CC(C)S(=O)(=O)c1oc(-c2cccs2)nc1S(=O)(=O)c1ccccc1  
 CC(=O)N1CCN(C(=O)Cn2c(-c3ccc(C)cc3)csc2=N)CC1  
 COc1ccc(NC(c2ccccc2Cl)c2c(C)[nH]c3ccccc23)cc1OC  
 N=c1scc(-c2ccc(Cl)cc2)n1CC(=O)N1CCN(c2ccccc2)CC1  
 CC(C)CC(N)C(=O)NC(CC(C)C)C(=O)NC1CCOCC(O)C(O)COCC(C(=O)O)NC(=O)C(CC(C)C)NC(=O)C(CC(C)C)NC(=O)C(C)(C)NC1=O  
 COc1ccc(C(Nc2ccc(OC)c(OC)c2)c2c(C)[nH]c3ccccc23)cc1  
 COC(=O)c1ccc2c(c1)C(C)(C)C(C=Cc1ccc(OC)cc1)=[N+]2C  
 CCC(CC)(c1ccc(OCC(O)CO)c(C)c1)c1ccc(OCC(O)C(C)(C)CCCc2ccccc2)c(C)c1  
 CN1CCN(C(=O)Cn2c(-c3ccc(Cl)cc3)csc2=N)CC1  
 COc1ccc(C=CC2=[N+](C)c3ccc(OC)cc3C2(C)C)cc1  
 Cc1[nH]c2ccccc2c1C(Nc1ccc(Cl)cc1)c1ccccc1Cl  
 CC(=O)N1CCN(C(=O)Cn2c(-c3ccccc3)csc2=N)CC1  
 CCS(=O)(=O)c1oc(-c2cccs2)nc1S(=O)(=O)c1ccccc1  
 COc1ccc(NC(c2ccccc2Cl)c2c(C)[nH]c3ccccc23)cc1  
 Cc1ccc2c(C(Nc3ccc(C(F)(F)F)cc3)c3ccccc3Cl)c(C)[nH]c2c1  
 Cc1ccc2c(C(NC3ccccc3)c3ccccc3Cl)c(C)[nH]c2c1  
 CC(C)CS(=O)(=O)c1oc(-c2cccs2)nc1S(=O)(=O)c1ccc(F)cc1  
 Cc1[nH]c2ccccc2c1C(Nc1ccc(Cl)cc1)c1ncc[nH]1  
 CCC(CC)(c1ccc(OCC(O)CO)c(C)c1)c1ccc(OCC(O)C(C)(C)CCc2ccccc2)c(C)c1  
 CCS(=O)(=O)c1ccc(C(=O)NCCCC(=O)N2CCN(c3ccc(C(F)(F)F)cc3)CC2)cc1[N+](=O)[O-]  
 Cc1ccc(NC(c2ccccc2Cl)c2c(C)[nH]c3ccccc23)cc1  
 Cc1[nH]c2ccccc2c1C(Nc1ccccc1)c1ccc(Cl)cc1  
 COC(=O)c1ccc(C=CC2=[N+](C)c3ccc(OC)cc3C2(C)C)cc1  
 Cc1[nH]c2ccccc2c1C(Nc1ccccc1)c1ccccc1Cl  
 Cc1[nH]c2ccccc2c1C(Nc1ccc(N(C)C)cc1)c1ccccc1Cl  
 Cc1ccc2c(C(NC3ccc(C(F)(F)F)cc3)c3ccccc3Cl)c(C)[nH]c2c1  
 COc1ccc(C(Nc2ccccc2)c2c(C)[nH]c3ccccc23)cc1

### S4.9.3 Seeds

C=C1C(=CC=C2CCCC3(C)C2CCC3C(C)CCCC(C)(C)O)CC(O)C(CCn2ncnm2)C1O  
 C=C1C(O)CC(=CC=CCC(C)(C)CC(C)CCCC(C)(C)O)CC1O  
 C=C1C(=CC=C2CCCC3(C)C2CCC3C(C)CCCC(C)(C)O)CC(O)C2=CCOC12  
 C=C1C(O)CC(=CC=C2CCCC3(C)C2CCC3C(C)C(CCCC)CCO)CC1O  
 C=C1C(=O)OC(CC(C)C2CCC3C(=CC=C4CC(O)C(C)C(O)C4=C)CCCC32C)C1C  
 C=C1C(=CC=C2CCCC3(C)C2CCC3C(C)CC2OC(=O)C(=C)C2CC(C)C)CC(O)C(CCCO)C1O  
 C=C1C(O)CC(=CC=CCC(C)CC(C)CCCC(C)(C)O)CC1O  
 COc1ccc(NC(c2ccccc2Cl)c2c(C)[nH]c3cc(C)ccc23)cc1OC  
 COc1ccc(C(Nc2ccc(C(F)(F)F)cc2)c2c(C)[nH]c3ccccc23)cc1  
 C=C1C(=CC=C2CCC(C)CCCC(C)(C)O)C3(C)C2CCC3C(C)CCO)CC(O)CC1O  
 C=C1C(O)CC(=CC=C2CCCC3(C)C2CCC3C(C)C=CCC(O)C23CC4CC(CC(C4)C2)C3)CC1O  
 CCCCS(=O)(=O)NCCCC(C)C1CC2C(=CC=C3CC(O)CC(O)C3)CCCC21C  
 N=c1scc(-c2ccc(Cl)cc2)n1CC(=O)N1CCOCC1  
 C=C1C(O)CC(=CC=C2CCCC3(C)C2CCC3C(C)CCCC(C)O)CC1O  
 C=C1C(=CC=C2CCCC3(C)C2CCC3C(C)CCC(O)C(C)C)CC(O)CC1O

CC(CCC(=O)O)C1CCC2C3CCC4CC(O)CCC4(C)C3CCC12C  
 CCC(=CC=CC(O)(C(F)(F)F)C(F)(F)F)c1cccc(O)C2ccc(CO)c(CO)c2)c1  
 COC(=O)c1ccc2c(c1)C(C)(C)C(C=Cc1ccc(O)cc1)=[N+]2C  
 C=C1C(=CC=C2CCCC3(C)C2CCC3C(C)CC2OC(=O)C(=C)C2CCC)CC(O)C(CCCO)C1O  
 C=C1C(=CC=C2CCCC3(C)C2CCC3C(C)CC2OC(=O)C(=C)C2CC)CC(O)C(CCCO)C1O  
 C=C1C(=CC=C2CCCC3(C)C2CCC3C(C)CCCC(C)(C)O)CC(O)C(CCN2cnm2)C1O  
 CCn1c(C(=O)NC(C)C(=O)O)ccc1C(CC)(CC)c1ccc(O)C(C)(C)C)c(C)c1  
 C=C1C(=CC=C2CCCC3(C)C2CCC3C(C)CCCC(C)(C)O)CC(O)C(CCN2nccn2)C1O  
 CC(C=CC(=O)NO)=CC(C)C1CCC2C(=CC=C3CC(O)CC(O)C3)CCCC21C  
 C=C1C(=CC=C2CCCC3(C)C2CCC3C(C)CC2OC(=O)C(=C)C2(C)C)CC(O)CC1O  
 C=C1C(=CC=C2CCCC3(C)C2CCC3C(C)OCCCC(O)(CC)CC)CC(O)CC1C(F)F  
 C=C1C(=CC=C2CCCC3(C)C2CCC3C(C)CC2CC(C)(O)C(=O)N2Cc2cc(O)CC(C)c2)CC(O)CC1O  
 C=C1C(O)CC(=CC=C2CCCC3(C)C2CCC3C(C)C(CC)CCO)CC1O  
 CCn1c(C(=O)NC(C)CO)ccc1C(CC)(CC)c1ccc(O)C(C)(C)C)c(C)c1  
 CCC(CC)(c1ccc(O)C(CO)C)c(C)c1)c1ccc(O)C(C)(C)C)c(C)c1

## S4.10 Sample 10

### S4.10.1 Training set

Cc1[nH]c2cccc2c1C(Nc1cccc1)c1ccc(C(C)C)cc1  
 CC(C=CCC(O)C12CC3CC(CC(C3)C1)C2)C1CCC2C(=CC=C3CC(O)CC(O)C3)CCCC21C  
 C=C1C(=CC=C2CCCC3(C)C2CCC3C(C)CCCC(C)(C)O)CC(O)CC1C(F)F  
 C=C1C(=CC=C2CCCC3(C)C2CCC3C(C)COCC(=C)C(C)(C)C)CC(O)CC1O  
 C=C1C(O)CC(=CC=C2CCCC3(C)C2CCC3C(C)C(CCCC)CCC(C)(C)O)CC1O  
 C=C1C(=CC=C2CCCC3(C)C2CCC3C(C)COc2cccc2)CC(O)CC1O  
 C=C1C(=CC=C2CCCC3(C)C2CCC3C(C)C=CC(O)C2CC2)CC(O)CC1O  
 C=C1C(O)CC(=CC=C2CCCC3(C)C2CCC3C(C)C(CC)CCO)CC1O  
 Nc1nc2ccc(S(=O)(=O)N3CCCC3)cc2s1  
 CCC(CC)(c1ccc(O)C(CO)C)c(C)c1)c1ccc(O)C(C)(C)CCc2cccc2)c(C)c1  
 CCS(=O)(=O)c1oc(-c2cccs2)nc1S(=O)(=O)c1cccc1  
 CCC(CC)(c1ccc(O)C(C)(C)C)c(C)c1)c1ccc(O)C(CO)CCO)c(C)c1  
 C=C1C(=CC=C2CCCC3(C)C2CCC3C(C)CC2OC(=O)C(=C)C2CCCC)CC(O)C(CCCO)C1O  
 C=C1C(=CC=C2CCCC3(C)C2CCC3C(C)COCC(=C)C2(C)CCCC2)CC(O)CC1O  
 C=C1C(=CC=C2CCCC3(C)C2CCC3C(C)C(C)CCC(C)(C)O)CC(O)CC1O  
 C=C1C(=CC=C2CCCC3(C)C2CCC3C(C)CCCC(C)(C)O)CC(O)C2=CCOC12  
 C=C1C(=CC=C2CCCC3(C)C2CCC3C(C)CC2CC(C)(O)C(=O)N2CCc2cc(O)cc(O)c2)CC(O)CC1O  
 C=C1C(=CC=C2CCCC3(C)C(C(C)CCC(F)(F)C(O)(CC)CC)=CCC23)CC(O)CC1C(F)F  
 CCC(O)(CC)CSC(C)C1=CCC2C(=CC=C3CC(O)C(C)(O)C(O)C3)CCCC12C  
 CCC(CC)(c1ccc(O)C(C)(C)C)c(C)c1)c1ccc(C(=O)NC(CO)CCO)n1C  
 C=C1C(=CC=C2CCCC3(C)C2CCC3C(C)CCCC(C)(C)O)CC(O)C(CCN2cnm2)C1O  
 CC(CCCNC(=O)CS)C1CCC2C(=CC=C3CC(O)CC(O)C3)CCCC21C  
 CCC(CC)(c1ccc(O)C(CO)C)c(C)c1)c1ccc(O)C(C)(C)CCc2cccc2)c(C)c1  
 C=C1C(O)CC(=CC=C2CCCC3C2CCC3C(C)CCCC(C)(C)O)CC1O  
 C=C1C(O)CC(=CC=C2CCCC3(C)C2CCC3C(C)C(CC)CC(O)(CC)CC)CC1O  
 C=C1C(=CC=C2CCCC3(C)C2CCC3C(C)CC2OC(=O)C(=C)C2CCCC)CC(O)C(O)C(CO)C1O  
 Cc1ccc(NC(c2cccc2Cl)c2c(C)[nH]c3cccc23)cc1  
 Cc1[nH]c2cccc2c1C(Nc1cccc1)c1ccc(Cl)cc1  
 CC[Si](CC)(c1ccc(O)C(C)(C)C)c(C)c1)c1ccc(O)C2CO2)c(C)c1  
 C=C1C(=CC=C2CCCC3(C)C2CCC3C(C)CC2OC(=O)C(=C)C2CC(C)C)CC(O)CC1O  
 C=C1C(=CC=C2CCCC3(C)C2CCC3C(C)CC2OC(=O)C(=C)C2(C)C)CC(O)CC1O  
 COc1ncccc1NC(c1ccnc1)c1c(C)[nH]c2cc(C)ccc12  
 CC(CCCNS(N)(=O)=O)C1CCC2C(=CC=C3CC(O)CC(O)C3)CCCC21C  
 C=C1C(=CC=C2CCCC3(C)C2CCC3C(C)CC)CC(O)C(CCCO)C1O  
 CCC(CC)(c1ccc(O)C(=O)C(C)(C)C)c(C)c1)c1ccc(C(=O)NCC(=O)O)n1C  
 COc1ccc(C(Nc2ccc(C(F)(F)F)cc2)c2c(C)[nH]c3cccc23)cc1  
 CC(C)CS(=O)(=O)c1oc(-c2cccs2)nc1S(=O)(=O)c1ccc(F)cc1  
 CCn1c(C(=O)NC(CO)CCO)ccc1C(CC)(CC)c1ccc(O)C(C)(C)C)c(C)c1

Cc1ccc2c(C(Nc3ccc(Cl)cc3)c3ccccc3Cl)c(C)[nH]c2c1  
C=C1C(=CC=C2CCCC3(C)C2CCC3C(C)C(CCCC)CC(O)C(C)C)CC(O)CC10  
C=C1C(=CC=C2CCCC3(C)C2CCC3C(C)CC2OC(=O)C(=C)C23CCCC3)CC(O)CC10  
CCn1c(C(=O)NC(C)C(=O)O)ccc1C(CC)(CC)c1ccc(OCC(O)C(C)(C)C)c(C)c1  
N=c1scc(-c2ccc(Cl)cc2)n1CC(=O)N1CCOCC1  
C=C1C(=CC=C2CCCC3(C)C2CCC3C(C)CC2OC(=O)C(=C)C2C)CC(O)CC10  
C=C1C(=CC=C2CCCC3(C)C2CCC3C(C)CC2CC(C)(O)C(=O)N2CCc2ccccc2)CC(O)CC10  
Cc1ccc(-c2csc(=N)n2CC(=O)N2CCN(c3ccccc3)CC2)cc1  
C=C1C(=O)OC(CC(C)C2CCC3C(=CC=C4CC(O)C(C)C(O)C4=C)CCCC32C)C1C  
C=C1C(O)CC(=CC=C2CCCC3(C)C(CCCC(C)(C)O)CCC23)CC10  
CCC(CC)(c1ccc(OCC(O)C(C)(C)C)c(C)c1)c1ccc(OCC(O)C(O)CO)c(C)c1  
CC(C=CC(=O)NO)=CC(C)C1CCC2C(=CC=C3CC(O)CC(O)C3)CCCC21C  
CCn1c(C(=O)NCC(=O)OC)ccc1C(CC)(CC)c1ccc(OCC(=O)C(C)(C)C)c(C)c1  
Cc1[nH]c2ccccc2c1C(Nc1ccc(Cl)cc1)c1ccncc1  
C=C1C(=CC=C2CCCC3(C)C2CCC3C(C)C=CC(O)C2(C=CC(=O)OCC)CC2)CC(O)CC10  
Cc1ccc2c(C(NC3ccc(C(F)(F)F)cc3)c3ccccc3Cl)c(C)[nH]c2c1  
C=C1C(=CC=C2CCCC3(C)C2CCC3C(C)CC2CC(C)(O)C(=O)N2Cc2ccccc2)CC(O)CC10  
CC(C)CC(N)C(=O)NC(CC(C)C)C(=O)NC1CCOCC(O)C(O)COCC(C(=O)O)NC(=O)C(CC(C)C)NC(=O)C(C)(C)NC1=O  
C=C1C(=CC=C2CCCC3(C)C2CCC3C(C)CCCC(C)(C)C)CC(O)CC10  
CC(CCCC(=O)Nc1ccccc1N)C1CCC2C(=CC=C3CC(O)CC(O)C3)CCCC21C  
CC(CCCNS(C)(=O)=O)C1CCC2C(=CC=C3CC(O)CC(O)C3)CCCC21C  
C=C1C(=CC=C2CCCC3(C)C2CCC3C(C)CCCC(C)(C)O)CC(O)C(CCn2cnmn2)C10  
CCC(=CC=CC(O)(C(F)(F)F)C(F)(F)F)c1cccc(OCC2ccc(CO)c(CO)c2)c1  
CC(CCCC(C)(C)O)C1CCC2C(=CC=C3CC(O)C(=CCO)C(O)C3)CCCC21C  
CCC(O)(CC)CSC(C)C1=CCC2C(=CC=C3CC(O)C(=CCO)C(O)C3)CCCC12C  
C=C1C(O)CC(=CC=C2CCCC3(C)C2CCC3C(C)CCCC(C)(C)O)CC10  
C=C1C(O)CC(=CC=C2CCCC3(C)C2CCC3C(C)CC#CC(O)C23CC4CC(CC(C4)C2)C3)CC10  
C=C1C(=CC=C2CCC(CCCCCC(C)(C)O)C3(C)C2CCC3C(C)CCO)CC(O)CC10  
C=C1C(O)CC(=CC=C2CCCC3(C)C2CCC3C(C)CC#CC(O)CC23CC4CC(CC(C4)C2)C3)CC10  
CN1CCN(C(=O)Cn2c(-c3ccc(Cl)cc3)csc2=N)CC1  
C=C1C(=CC=C2CCCC3(C)C2CCC3C(C)CC2OC(=O)C(=C)C2CC)CC(O)C(OCCO)C10  
C=C1C(=CC=C2CCCC3(C)C2CCC3C(C)CC2CC(C)(O)C(=O)N2CCc2cc(O)cc(O)C2)CC(O)CC10  
C=C1C(=CC=C2CCCC3(C)C2CCC3C(C)CC2OC(=O)C(=C)C2CCC)CC(O)C(C)C10  
C=C1C(=CC=C2CCCC3(C)C2CCC3C(C)C(CCCC)CCC(C)(C)O)CC(O)CC10  
C=C1CCC(O)CC1=CC=C1CCCC2(C)C1CCC2C(C)CCCC(C)C  
Cc1[nH]c2ccccc2c1C(Nc1ccc(N(C)C)cc1)c1ccccc1C1  
C=C1C(=CC=C2CCCC3(C)C2CCC3C(C)CC2CC(C)(O)C(=O)N2Cc2cc(O)CC(O)CC10  
N=c1scc(-c2ccc(Cl)cc2)n1CC(=O)N1CCN(c2ccccc2)CC1  
CCC(CC)(c1ccc(OCC(O)CO)c(C)c1)c1ccc(OCC(O)C(C)(C)C)c(C)c1  
CC(=O)N1CCN(C(=O)Cn2c(-c3ccc(Cl)cc3)csc2=N)CC1  
C=C1C(O)CC(=CC=C2CCCC3(C)C2CCC3C(C)CCCC(C)O)CC10  
CCCCS(=O)(=O)NCCCC(C)C1CCC2C(=CC=C3CC(O)CC(O)C3)CCCC21C  
CCC(CC)(c1ccc(OCC(O)C(C)(C)C)c(C)c1)c1ccc(OCC(O)CO)c(C)c1  
CCC(CC)(c1ccc(OCC(O)C(C)(C)C)c(C)c1)c1ccc(C(=O)NCC(=O)O)n1C  
Cc1[nH]c2ccccc2c1C(Nc1ccc(Cl)cc1)c1ccncc1  
CCC(CC)(c1ccc(OCC(O)C(C)(C)C)c(C)c1)c1ccc(C(=O)NCCC)O)n1C  
C=C1C(=CC=C2CCCC3(C)C2CCC3C(C)CCCC(C)(C)O)CC(O)C(CCn2nccn2)C10  
COC(=O)c1ccc2c(c1)C(C)(C)C(C=Cc1ccc(O)cc1)=[N+]2C  
C=C1C(=CC=C2CCCC3(C)C2CCC3C(C)CC2CC(C)(O)C(=O)N2C)CC(O)CC10  
C=C1C(=CC=C2CCCC3(C)C2CCC3C(C)C(CC)CCC(C)(C)O)CC(O)CC10  
C=C1C(=CC=C2CCCC3(C)C2CCC3C(C)CC2OC(=O)C(=C)C2CCCC)CC(O)C(C)C10  
COc1ccc(NC(c2ccc(OC(F)(F)F)cc2)c2c(C)[nH]c3ccccc23)cc1OC  
C=C1C(O)CC(=CC=C2CCCC3(C)C2CCC3C(C)C(CCCC)CC(C)(C)O)CC10  
CC(CCCC(C)(C)O)C1CCC2C(=CC=C3CC(O)C4=CCOC4C3)CCCC21C  
C=C1C(O)CC(=CC=C2CCCC3(C)C2CCC3C(C)C=CCC(O)CC23CC4CC(CC(C4)C2)C3)CC10  
C=C1C(=O)OC(CC(C)C2CCC3C(=CC=C4CC(O)C(CCCO)C(O)C4=C)CCCC32C)C1C  
C=C1C(=CC=C2CCCC3(C)C(C4(CCC(=O)C(C)(C)O)CC4)=CCC23)CC(O)CC10  
C=C1C(=O)OC(CC(C)C2CCC3C(=CC=C4CC(O)C(O)C4=C)CCCC32C)C1C

CC(O)CCCC(C)C1CCC2C(=CC=C3CC(O)C(C)C(O)C3)CCCC21C  
Cc1ccc2c(C(Nc3ccc(C(F)(F)F)cc3)c3ccccc3C1)c(C)[nH]c2c1  
CC(C=CC(=O)Nc1ccccc1N)=CC(C)C1CCC2C(=CC=C3CC(O)CC(O)C3)CCCC21C  
C=C1C(=CC=C2CCCC3(C)C2CCC3C(C)C0CC#CC(C)(C)C)CC(O)CC10

#### S4.10.2 Testing set

The SMILES strings of the recreated VDR ligands are highlighted in yellow.

C=C1C(=CC=C2CCCC3(C)C2CCC3C(C)CCCC(C)(C)O)CC(O)C(Cc2n2cmm2)C10  
C=C1C(=CC=C2CCCC3(C)C2CCC3C(C)CCCC(C)(C)O)CC(O)CC10  
C=C1C(O)CC(=CC=C2CCCC3(C)C2CCC3C(C)C=CC(O)C23CC4CC(CC(C4)C2)C3)CC10  
C=C1C(O)CC(=CC=C2CCCC3(C)C2CCC3C(C)C(C)(C)CCC(C)(C)O)CC10  
CCC(O)(CC)CSC(C)C1=CC2C(=CC=C3CC(O)C(O)C3)CCCC12C  
C=C1C(O)CC(=CC=C2CCCC3(C)C2CCC3C(C)CCC(O)(CC)CC)CC10  
CCCOC1C(O)CC(=CC=C2CCCC3(C)C(C(C)SCCC(O)(CC)CC)=CCC23)CC10  
C=C1C(O)CC(=CC=C2CCCC3(C)C2CCC3C(C)C(C)CCC(C)(C)O)CC10  
C=C1C(O)CC(=CC=C2CCCC3C(C)CCCC(C)(C)O)CCC23)CC10  
CC(CCCC(C)(C)O)C1CCC2C(=CC=C3CC(O)C(=CCF)C(O)C3)CCCC21C  
C=C1C(=CC=C2CCCC3(C)C2CCC3C(C)COc2ccc(C(C)(C)O)cc2)CC(O)CC10  
C=C1C(=CC=C2CCCC3(C)C2CCC3C(C)CSc2ccc(C(C)(C)O)cc2)CC(O)CC10  
CCCOC1C(O)CC(=CC=C2CCCC3(C)C(C(C)SCCC(O)(CC)CC)=CCC23)CC10  
C=C1C(O)CC(=CC=C2CCCC3(C)C2CCC3C(C)OCC(C)C(C)(C)O)CC10  
C=C1C(=CC=C2CCCC3(C)C(C(C)CCCC(C)(C)O)CCC23C)CC(O)CC10  
C=C1C(=CC=C2CCCC3(C)C2CCC3C(C)CCCC(C)(C)O)CC(O)C(Cc2c2cmm2)C10  
C=C1C(O)CC(=CC=C2CCCC3(C)C2CCC3C(C)C(CCO)CCCC)CC10  
C=C1C(=CC=C2CCCC3(C)C2CCC3C(C)(C)CC)CC(O)C(=CCCO)C10  
C=C1C(=CC=C2CCCC3(C)C2CCC3C(C)C=CC(O)C2(C(=O)O)CCCC)CC(O)CC10  
C=C1C(=CC=C2CCCC3(C)C2CCC3C(C)CC(C)C)CC(O)C(=CCCO)C10  
C=C1C(O)CC(=CC=C2CCCC3(C)C2CCC3C(C)C(CCCC)CC(O)(CC)CC)CC10  
CCCc1cc(C(O)(CC)CC)ccc1-c1cc(CCc2ccc(CO)c(CO)c2)ccc1C  
CC(CCCC(C)(C)O)C1CCC2C(=CC=C3CC(O)CC(O)C3=O)CCCC21C  
C=C1C(=CC=C2CCCC3(C)C(C4(CCCC(C)(C)O)CC4)=CCC23)CC(O)CC10  
C=C1C(=CC=C2CCCC3(C)C2CCC3C(C)CCCC(C)(C)O)CC(O)C(Cc2c2cnc2)C10  
C=C1CC(CC(C)C)C2CCC3C(=CC=C4CC(O)C(=C)C(O)C4)CCCC32C)OC1=O  
**C=C1C(O)CC(=CC=C2CCCC3(C)C2CCC3C(C)C(CCCC)CC(O)CC10**  
C=C1C(O)CC(=CC=C2CCCC3(C)C2CCC3C(C)C=CCC(O)C23CC4CC(CC(C4)C2)C3)CC10  
Cc2n1c(C(=O)NC(C)CO)ccc1C(CC)(CC)c1ccc(OCC(O)C(C)(C)C)c(C)c1  
CCC(CC)(c1ccc(OCC(CO)CO)c(C)c1)c1ccc(OCC(O)C(C)(C)C)c(C)c1  
C=C1C(=CC=C2CCCC3(C)C2CCC3C(C)C(CCO)CCCC)CC(O)CC10  
C=C1C(O)CC(=CC=C2CCCC3(C)C2CCC3C(C)C(CC)CC(C)(C)O)CC10  
CCC(=CC=CC(O)(C(F)(F)F)C(F)(F)F)c1cccc(CCc2ccc(CO)c(CO)c2)c1  
C=C1C(O)CC(=CC=CCC(C)(C)CC(C)CCCC(C)(C)O)CC10  
CCCc1cc(C(O)(CC)CC)ccc1-c1cc(OCC2ccc(CO)c(CO)c2)ccc1CC  
C=C1C(O)CC(=CC=C2CCCC3(C)C2CCC3C(C)C(CC)CCC(C)(C)O)CC10  
**C=C1C(O)CC(=CC=C2CCCC3(C)C2CCC3C(C)C(CC)CC(O)CC10**  
C=C1C(O)CC(=CC=CCC(C)CC(C)CCCC(C)(C)O)CC10  
C=C1C(=CC=C2CCC(C)CCCC(C)(C)O)C3(C)C2CCC3C(C)CC(O)CC10  
C=C1CC(CC(C)C)C2CCC3C(=CC=C4CC(O)CC(O)C4=C)CCCC32C)OC1=O  
C=C1C(=CC=C2CCCC3(C)C2CCC3C(C)CC2OC(=O)C(=C)C2CCC)CC(O)CC10  
C=C1C(=CC=C2CCCC3(C)C2CCC3C(C)CC2OC(=O)C(=C)C2CCC)CC(O)C(CCCO)C10  
C=C1C(=CC=C2CCCC3(C)C2CCC3C(C)CC2OC(=O)C(=C)C2CCC)CC(O)C(OCCCC)C10  
C=C1C(=CC=C2CCCC3(C)C2CCC3C(C)CC2OC(=O)C(=C)C2CC)CC(O)C(C)C10  
C=C1C(=CC=C2CCCC3(C)C2CCC3C(C)CCC(O)C(C)C)CC(O)CC10  
C=C1C(=CC=C2CCCC3(C)C2CCC3C(C)CC2OC(=O)C(=C)C2CCCC)CC(O)CC10  
C=C1C(=CC=C2CCCC(C)CCCC(C)(C)O)C3(C)C2CCC3C(C)CO)CC(O)CC10  
C=C1C(=CC=C2CCCC3(C)C2CCC3C(C)CC2OC(=O)C(=C)C2CC)CC(O)C(CCCO)C10  
C=C1C(=CC=C2CCCC3(C)C2CCC3C(C)CC2OC(=O)C(=C)C2CC)CC(O)CC10

C=C1C(=CC=C2CCCC3(C)C2CCC3C(C)CC2OC(=O)C(=C)C2CC(C)C)CC(O)C(CCCO)C1O  
C=C1C(=CC=C2CCCC3(C)C2CCC3C(C)CC2OC(=O)C(=C)C2CC(C)C)CC(O)C(OCCCC)C1O  
C=C1C(=CC=C2CCCC3(C)C2CCC3C(C)CC2OC(=O)C(=C)C2CC(C)C)CC(O)C(C)C1O  
CC(CCCNS(=O)(=O)C(F)(F)F)C1CCC2C(=CC=C3CC(O)CC(O)C3)CCCC21C  
CC(CCCNS(=O)(=O)c1ccccc1)C1CCC2C(=CC=C3CC(O)CC(O)C3)CCCC21C  
C=C1C(=CC=C2CCCC3(C)C2CCC3C(C)OCCCC(O)(CC)CC)CC(O)CC1C(F)F  
CCC(CC)(c1ccc(OCC(=O)C(C)(C)C)c(C)c1)c1ccc(OCC(=O)C(C)(C)C)c(C)c1  
CCC(=CC=CC(O)(CC)CC)c1cccc(OCC2ccc(CO)C(CO)c2)c1  
C=C1C(O)CC(=CC=C3CC(C)CCC(C)(C)O)CC1O  
COOCCC=C1C(O)CC(=CC=C2CCCC3(C)C2CCC3C(C)CCC(C)(C)O)CC1O  
C=C1C(=CC=C2CCCC3(C)C2CCC3C(C)CCC(C)(C)O)CC2OCC=C2C1O  
C=C1C(O)CC(=CC=C3CC(C)=CC(C)CCC(C)(C)O)CC1O  
C=C1C(=CC=C2CCCC3(C)C2CCC3C(C)CC2CC(C)(O)C(=O)N2Cc2cc(OCC)cc(OCC)c2)CC(O)CC1O  
CCC(CC)(c1ccc(OCC(=O)C(C)(C)C)c(C)c1)c1ccc(OCC(O)CO)c(C)c1  
C=C1C(=CC=C2CCCC3(C)C2CCC3C(C)CC2CC(C)(O)C(=O)N2Cc2cc(OCC)cc(OCC)c2)CC(O)CC1O  
CC(CCCNS(N)(=O)=O)C1CCC2C(=CC=C3CC(O)CC(O)C3)CCCC21C  
CC(CCCC(=O)NO)C1CCC2C(=CC=C3CC(O)CC(O)C3)CCCC21C  
C=C(COCC(C)C1CCC2C(=CC=C3CC(O)CC(O)C3=C)CCCC21C)C1=CCCC1(C)C  
C=C1C(=CC=C2CCCC3(C)C2CCC3C(C)CC2CC(C)(O)C(=O)N2Cc2cc(O)cc(O)C2)CC(O)CC1O  
CC(CCCNS(C)(=O)=O)C1CCC2C(=CC=C3CC(O)CC(O)C3)CCCC21C  
CC(CCC(=O)O)C1CCC2C3CCC4CC(O)CCC4(C)C3CCC12C  
C=C1C(=CC=C2CCCC3(C)C2CCC3C(C)CC2CC(C)(O)C(=O)N2CCCCc2ccccc2)CC(O)CC1O  
CCC(CC)(c1ccc(OCC(=O)C(C)(C)C)c(C)c1)c1ccc(C(=O)NC(C(=O)O)C(=O)O)n1C  
CC(CCCC(=O)Nc1ccccc1N)C1CCC2C(=CC=C3CC(O)CC(O)C3)CCCC21C  
CCC(CC)(c1ccc(OCC(O)C(C)(C)C)c(C)c1)c1ccc(C(=O)NC(C)CO)n1C  
**Cc1ccc(NC(c2ccccc2Cl)c2c(C)[nH]c3ccccc23)cc1C**  
C=C1C(=CC=C2CCCC3(C)C2CCC3C(C)CC2CC(C)(O)C(=O)N2Cc2ccc(O)cc2)CC(O)CC1O  
CCC(CC)(c1ccc(OCC(=O)C(C)(C)C)c(C)c1)c1ccc(C(=O)NCCC(=O)O)n1C  
CCCS(=O)(=O)c1oc(-c2cccs2)nc1S(=O)(=O)c1ccc(F)cc1  
CCC(CC)(c1ccc(OCC(O)C(C)(C)C)c(C)c1)c1ccc(C(=O)NCCC(=O)O)n1C  
N=c1scc(-c2ccccc2)n1CC(=O)N1CCN(c2ccccc2)CC1  
C=C1C(=CC=C2CCCC3(C)C2CCC3C(C)CC2CC(C)(O)C(=O)N2CCCCc2ccccc2)CC(O)CC1O  
CC(C)S(=O)(=O)c1oc(-c2cccs2)nc1S(=O)(=O)c1ccccc1  
CCC(CC)(c1ccc(OCC(=O)C(C)(C)C)c(C)c1)c1ccc(C(=O)NC(C)(=O)O)n1C  
CC(=O)N1CCN(C(=O)Cn2c(-c3ccc(C)cc3)csc2=N)CC1  
COc1ccc(NC(c2ccccc2Cl)c2c(C)[nH]c3ccccc23)cc1OC  
COc1ccc(C(Nc2ccc(O)C(O)C2)c2c(C)[nH]c3ccccc23)cc1  
COC(=O)c1ccc2c(c1)C(C)(C)C(C=Cc1ccc(O)cc1)=[N+]2C  
Cc1ccc(CNC(c2ccccc2Cl)c2c(C)[nH]c3cc(C)ccc23)cc1  
Cc1[nH]c2ccccc2c1C(Nc1ccc(Cl)cc1)c1ncs1  
COc1ccc(C=CC2=[N+](C)c3ccc(O)cc3C2(C)C)cc1  
Cc1[nH]c2ccccc2c1C(Nc1ccc(Cl)cc1)c1ccccc1Cl  
Cc1[nH]c2ccccc2c1C(Nc1ccc([N+](=O)[O-])cc1)c1ccccc1Cl  
COc1ccc(NC(c2ccc(C(F)(F)F)cc2)c2c(C)[nH]c3ccccc23)cc1OC  
CC(=O)N1CCN(C(=O)Cn2c(-c3ccccc3)csc2=N)CC1  
Cc1ccc2c(C(Nc3ccc(O)C(F)(F)F)cc3)c3ccccc3Cl)c(C)[nH]c2c1  
Cc1[nH]c2ccccc2c1C(NC1ccccc1)c1ccccc1Cl  
CCn1c(C(=O)NCCO)ccc1C(CC)(CC)c1ccc(OCC(O)C(C)(C)C)c(C)c1  
CCOc1ccc(C=CC2=[N+](C)c3ccc(C(=O)O)cc3C2(C)C)cc1  
**COc1ccc(NC(c2ccccc2Cl)c2c(C)[nH]c3ccccc23)cc1**  
Cc1ccc2c(C(NC3ccccc3)c3ccccc3Cl)c(C)[nH]c2c1  
Cc1[nH]c2ccccc2c1C(Nc1ccc(Cl)cc1)c1ncc[nH]1  
Cc1ccc2c(C(Nc3ccccc3)c3ccccc3Cl)c(C)[nH]c2c1  
CS(=O)(=O)c1ccc(C(=O)NCCCC(=O)N2CCN(c3ccc(C(F)(F)F)cc3)CC2)cc1[N+](=O)[O-]  
COc1ccc2c(C(Nc3ccc(Cl)cc3)c3ccccc3Cl)c(C)[nH]c2c1  
COC(=O)c1ccc(C=CC2=[N+](C)c3ccc(O)cc3C2(C)C)cc1  
**Cc1[nH]c2ccccc2c1C(Nc1ccccc1)c1ccccc1Cl**  
COc1ccccc1NC(c1ccccc1Cl)c1c(C)[nH]c2ccccc12  
COc1ccc(NC(c2nccs2)c2c(C)[nH]c3ccccc23)cc1OC

CC1ccc(NC(c2ccccc2Cl)c2c(C)[nH]c3cc(C)ccc23)cc1OC  
CC1ccc(C(Nc2cccn2)c2c(C)[nH]c3ccccc23)cc1

### S4.10.3 Seeds

CCC(O)(CC)CSC(C)C1=CCC2C(=CC=C3CC(O)C(C)(O)C(O)C3)CCCC12C  
CCS(=O)(=O)c1oc(-c2cccs2)nc1S(=O)(=O)c1ccccc1  
C=C1C(=CC=C2CCCC3(C)C2CCC3C(C)COCc2ccccc2)CC(O)CC1O  
CCCCS(=O)(=O)NCCCC(C)C1CCC2C(=CC=C3CC(O)CC(O)C3)CCCC21C  
CC(C)CC(N)C(=O)NC(CC(C)C)C(=O)NC1CCOC(O)C(O)COC(C(=O)O)NC(=O)C(CC(C)C)NC(=O)C(CC(C)C)NC(=O)C(C)(C)NC1=O  
Cc1ccc2c(C(NC3ccc(C(F)(F)F)cc3)c3ccccc3Cl)c(C)[nH]c2c1  
CCC(CC)(c1ccc(OCC(O)C(C)(C)C)c(C)c1)c1ccc(OCC(O)C(O)CO)c(C)c1  
CC(C)CS(=O)(=O)c1oc(-c2cccs2)nc1S(=O)(=O)c1ccc(F)cc1  
C=C1C(=CC=C2CCCC3(C)C2CCC3C(C)CC2OC(=O)C(=C)C2CCCC)CC(O)C(OCCCO)C1O  
C=C1CCC(O)CC1=CC=C1CCCC2(C)C1CCC2C(C)CCCC(C)C  
CC1ccc(C(Nc2ccc(C(F)(F)F)cc2)c2c(C)[nH]c3ccccc23)cc1  
C=C1C(O)CC(=CC=C2CCCC3(C)C(CCCCC(C)(C)O)CCC23)CC1O  
C=C1C(=CC=C2CCCC3(C)C(C(C)CCC(F)(F)C(O)(CC)CC)=CCC23)CC(O)CC1C(F)F  
C=C1C(=CC=C2CCCC3(C)C2CCC3C(C)COC(=C)C(C)(C)C)CC(O)CC1O  
Cc1ccc(NC(c2ccccc2Cl)c2c(C)[nH]c3ccccc23)cc1  
C=C1C(=CC=C2CCCC3(C)C2CCC3C(C)CC2OC(=O)C(=C)C2CCCC)CC(O)C(C)C1O  
C=C1C(O)CC(=CC=C2CCCC3(C)C2CCC3C(C)CC#CC(O)CC23CC4CC(CC(C4)C2)C3)CC1O  
CC(O)CCCC(C)C1CCC2C(=CC=C3CC(O)C(C)C(O)C3)CCCC21C  
C=C1C(=CC=C2CCCC3(C)C2CCC3C(C)CC2OC(=O)C(=C)C2CC)CC(O)C(OCCCO)C1O  
CCC(CC)(c1ccc(OCC(O)CO)c(C)c1)c1ccc(OCC(O)C(C)(C)C)c(C)c1  
Cc1[nH]c2ccccc2c1C(Nc1cccn1)c1ccc(C(C)C)cc1  
CCC(O)(CC)CSC(C)C1=CCC2C(=CC=C3CC(O)C(=CCO)C(O)C3)CCCC12C  
C=C1C(=CC=C2CCCC3(C)C2CCC3C(C)C(CC)CCC(C)(C)O)CC(O)CC1O  
CCn1c(C(=O)NC(CO)CCO)ccc1C(CC)(CC)c1ccc(OCC(O)C(C)(C)C)c(C)c1  
CCC(CC)(c1ccc(OCC(O)C(C)(C)C)c(C)c1)c1ccc(C(=O)NCCC)nc1C  
CCC(CC)(c1ccc(OCC(O)C(C)(C)C)c(C)c1)c1ccc(OCC(O)CCO)c(C)c1  
C=C1C(O)CC(=CC=C2CCCC3(C)C2CCC3C(C)C(CC)CCO)CC1O  
Nc1nc2ccc(S(=O)(=O)N3CCCC3)cc2s1  
C=C1C(=CC=C2CCCC3(C)C2CCC3C(C)CC2CC(C)(O)C(=O)N2Cc2ccccc2)CC(O)CC1O  
C=C1C(=CC=C2CCCC3(C)C2CCC3C(C)CCCC(C)(C)O)CC(O)C2=CCOC12

| SMILES                                                                   | Structure                                                                             |
|--------------------------------------------------------------------------|---------------------------------------------------------------------------------------|
| <chem>C=C1C(=CC=C2CCCC3(C)C2CCC3C(C)C(CC)CCC(C)(C)O)CC(O)CC1O</chem>     | 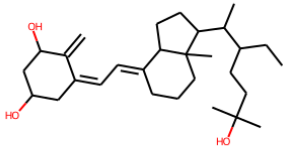   |
| <chem>C=C1C(=CC=C2CCCC3(C)C2CCC3C(C)CC2OC(=O)C(=C)C2CCC)CC(O)CC1O</chem> |    |
| <chem>C=C1C(O)CC(=CC=C2CCCC3(C)C2CCC3C(C)C(CC)CCCO)CC1O</chem>           |   |
| <chem>C=C1C(O)CC(=CC=C2CCCC3(C)C2CCC3C(C)C(CCCC)CCCO)CC1O</chem>         |  |
| <chem>C=C1C(O)CC(=CC=C2CCCC3(C)C2CCC3C(C)CCCC(C)O)CC1O</chem>            |  |

|                                                                      |                                                                                       |
|----------------------------------------------------------------------|---------------------------------------------------------------------------------------|
| <chem>C=C1C(O)CC(=CC=C2CCCC3(C)C2CCC3C(C)C(CCO)CCCC)CC1O</chem>      | 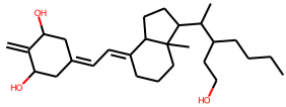   |
| <chem>CCCCS(=O)(=O)NCCCC(C)C1CCC2C(=CC=C3CC(O)CC(O)C3)CCCC21C</chem> |    |
| <chem>C=C1C(O)CC(=CC=C2CCCC3(C)C2CCC3C(C)CCCC(C)(C)O)CC1O</chem>     |   |
| <chem>C=C1C(=CC=C2CCCC3(C)C2CCC3C(C)CC)CC(O)C(=CCCO)C1O</chem>       |  |
| <chem>C=C1C(O)CC(=CC=C2CCCC3C2CCC3C(C)CCCC(C)(C)O)CC1O</chem>        |  |



|                                                                     |                                                                                       |
|---------------------------------------------------------------------|---------------------------------------------------------------------------------------|
| <chem>C=C1C(=CC=C2CCCC3(C)C2CCC3C(C)CCCC(C)(C)O)CC(O)CC1O</chem>    | 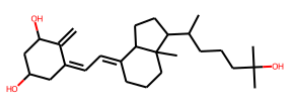   |
| <chem>C=C1C(O)CC(=CC=C2CCCC3(C)C(CCCCC(C)(C)O)CCC23)CC1O</chem>     |    |
| <chem>C=C1C(O)CC(=CC=C2CCCC3(C)C2CCC3C(C)C(CC)CCO)CC1O</chem>       |   |
| <chem>C=C1C(=CC=C2CCCC3(C)C2CCC3C(C)C(C)CCC(C)(C)O)CC(O)CC1O</chem> |  |
| <chem>CC(O)CCCC(C)C1CCC2C(=CC=C3CC(O)C(C)C(O)C3)CCCC21C</chem>      |  |

|                                                                         |                                                                                       |
|-------------------------------------------------------------------------|---------------------------------------------------------------------------------------|
| <chem>C=C1C(O)CC(=CC=CCC(C)CC(C)CCCC(C)(C)O)CC1O</chem>                 | 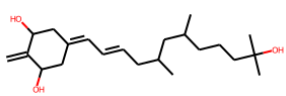   |
| <chem>CCC(CC)(c1ccc(OCC(O)CO)c(C)c1)c1ccc(OCC(O)C(C)(C)C)c(C)c1</chem>  |    |
| <chem>CCC(CC)(c1ccc(OCC(O)C(C)(C)C)c(C)c1)c1ccc(OC(CO)CCO)c(C)c1</chem> |   |
| <chem>CCC(CC)(c1ccc(OCC(O)C(C)(C)C)c(C)c1)c1ccc(C(=O)NC(C)CO)n1C</chem> |  |
| <chem>CCC(CC)(c1ccc(OCC(O)C(C)(C)C)c(C)c1)c1ccc(C(=O)NCCCO)n1C</chem>   |  |

|                                                              |                                                                                       |
|--------------------------------------------------------------|---------------------------------------------------------------------------------------|
| <chem>COc1ccc(NC(c2ccccc2Cl)c2c(C)[nH]c3ccccc23)cc1OC</chem> | 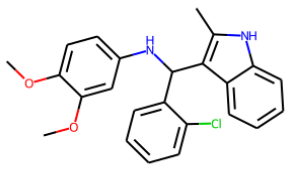   |
| <chem>Cc1[nH]c2ccccc2c1C(Nc1ccc(Cl)cc1)c1ccccc1Cl</chem>     |    |
| <chem>Cc1[nH]c2ccccc2c1C(Nc1ccccc1)c1ccccc1Cl</chem>         |   |
| <chem>Cc1ccc(NC(c2ccccc2Cl)c2c(C)[nH]c3ccccc23)cc1C</chem>   |  |
| <chem>Cc1[nH]c2ccccc2c1C(Nc1ccc(Cl)cc1)c1ccncc1</chem>       |  |

|                                                            |                                                                                     |
|------------------------------------------------------------|-------------------------------------------------------------------------------------|
| <chem>COc1ccc(NC(c2ccccc2Cl)c2c(C)[nH]c3ccccc23)cc1</chem> | 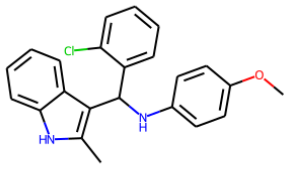 |
| <chem>N=c1sc(-c2ccccc2)n1CC(=O)N1CCN(c2ccccc2)CC1</chem>   |  |

Table S10: A list of all recreated VDR ligands

## References

- [1] C. A. Lipinski, F. Lombardo, B. W. Dominy and P. J. Feeney, *Adv. Drug. Deliver. Rev.*, 1997, **23**, 3.
- [2] A. K. Ghose, V. N. Viswanadhan and J. J. Wendoloski, *J. Comb. Chem.*, 1999, **1**, 55.
- [3] D. F. Veber, S. R. Johnson, H.-Y. Cheng, B. R. Smith, K. W. Ward and K. D. Kopple, *J. Med. Chem.*, 2002, **45**, 2615.
- [4] M. Congreve, R. Carr, C. Murray and H. Jhoti, *Drug Discov. Today*, 2003, **8**, 876.
- [5] W. P. Walters and M. Namchuk, *Nat. Rev. Drug Discovery*, 2003, **2**, 259.
